# Supplementary material for: Low alcohol consumption and pregnancy and childhood outcomes: time to change guidelines indicating apparently ‘safe’ levels of alcohol during pregnancy? A systematic review and meta-analyses
Source: PubMed Central journal article supplement — BMJ Open. 2017 Aug 3;7(7):e015410. doi: 10.1136/bmjopen-2016-015410 (PMC5642770; doi:10.1136/bmjopen-2016-015410), 2017-08-03
Supplement: bmjopen-2016-015410.draft_revisions.pdf [file bmjopen-2016-015410.draft_revisions.pdf]

# BMJ Open

**Low alcohol consumption and pregnancy and childhood outcomes: time to change guidelines indicating apparently 'safe' levels of alcohol during pregnancy? A systematic review and meta-analyses.**

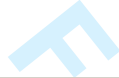

|                                 |                                                                                                                                                                                                                                                                                                                                                                                                                                                                                                                                                                                                                                                                                                                                                                                                                                                 |
|---------------------------------|-------------------------------------------------------------------------------------------------------------------------------------------------------------------------------------------------------------------------------------------------------------------------------------------------------------------------------------------------------------------------------------------------------------------------------------------------------------------------------------------------------------------------------------------------------------------------------------------------------------------------------------------------------------------------------------------------------------------------------------------------------------------------------------------------------------------------------------------------|
| Journal:                        | <i>BMJ Open</i>                                                                                                                                                                                                                                                                                                                                                                                                                                                                                                                                                                                                                                                                                                                                                                                                                                 |
| Manuscript ID                   | bmjopen-2016-015410                                                                                                                                                                                                                                                                                                                                                                                                                                                                                                                                                                                                                                                                                                                                                                                                                             |
| Article Type:                   | Research                                                                                                                                                                                                                                                                                                                                                                                                                                                                                                                                                                                                                                                                                                                                                                                                                                        |
| Date Submitted by the Author:   | 02-Dec-2016                                                                                                                                                                                                                                                                                                                                                                                                                                                                                                                                                                                                                                                                                                                                                                                                                                     |
| Complete List of Authors:       | Mamluk, Loubaba; University of Bristol School of Social and Community Medicine, IEU<br>Edwards, Hannah; University of Bristol, School of Social and Community Medicine<br>Savovic, Jelena; University of Bristol, NIHR CLAHRC West<br>Leach, Verity; University of Bristol<br>Jones, Tim; NIHR CLAHRC West<br>Moore, Theresa; NIHR CLAHRC West<br>Ijaz , Sharea ; NIHR CLAHRC West<br>Lewis, Sarah; University of Bristol, School of Social and Community Medicine<br>Donovan, Jenny; NIHR CLAHRC West<br>Lawlor, Debbie; Department of Social Medicine, University of Bristol, MRC Integrative Epidemiology Unit<br>Davey Smith, George; University of Bristol, Social Medicine<br>Fraser, Abigail; University of Bristol, MRC Integrative Epidemiology Unit<br>Zuccolo, Luisa; University of Bristol, School of Social and Community Medicine |
| <b>Primary Subject Heading</b>: | Epidemiology                                                                                                                                                                                                                                                                                                                                                                                                                                                                                                                                                                                                                                                                                                                                                                                                                                    |
| Secondary Subject Heading:      | Reproductive medicine                                                                                                                                                                                                                                                                                                                                                                                                                                                                                                                                                                                                                                                                                                                                                                                                                           |
| Keywords:                       | PAEDIATRICS, EPIDEMIOLOGY, Maternal medicine < OBSTETRICS                                                                                                                                                                                                                                                                                                                                                                                                                                                                                                                                                                                                                                                                                                                                                                                       |
|                                 |                                                                                                                                                                                                                                                                                                                                                                                                                                                                                                                                                                                                                                                                                                                                                                                                                                                 |

SCHOLARONE™  
Manuscripts

1  
2  
3 Systematic Review & Meta-analysis  
4  
5  
6

7 **Title:** Low alcohol consumption and pregnancy and childhood outcomes: time to change  
8 guidelines indicating apparently 'safe' levels of alcohol during pregnancy? A systematic review  
9 and meta-analyses.  
10  
11  
12

13  
14  
15 **Running title:** Low alcohol consumption and pregnancy and childhood outcomes.  
16  
17

18  
19 **Authors:** Loubaba Mamluk PhD<sup>1,2,3</sup>, Hannah B Edwards MSc<sup>2,3</sup>, Jelena Savović PhD<sup>2,3</sup>, Verity  
20 Leach PhD<sup>2,3</sup>, Timothy Jones PhD<sup>2,3</sup>, Theresa HM Moore MSc<sup>2,3</sup>, Sharea Ijaz PhD<sup>2,3</sup>, Sarah  
21 J. Lewis PhD<sup>2</sup>, Jenny L. Donovan PhD<sup>2,3</sup>, Deborah A. Lawlor PhD<sup>1,2,3</sup>, George Davey Smith  
22 PhD<sup>1,2</sup>, Abigail Fraser PhD<sup>\*1,2</sup>, Luisa Zuccolo PhD<sup>\*1,2</sup>  
23  
24  
25  
26

27 *\* Joint Last Authors*  
28  
29

30  
31  
32 **Author addresses:** Hannah B Edwards, Jelena Savovic, Verity Leach, Timothy Jones,  
33 Theresa HM Moore, Sharea Ijaz, and Jenny L. Donovan: NIHR CLAHRC West, University  
34 Hospitals Bristol, NHS Foundation Trust, 9th Floor, Whitefriars, Lewins Mead, Bristol, BS1  
35 2NT, United Kingdom. Sarah J. Lewis, Deborah A. Lawlor, George Davey Smith, Abigail  
36 Fraser, and Luisa Zuccolo: MRC Integrative Epidemiology Unit, School of Social and  
37 Community Medicine, University of Bristol, Oakfield House, Oakfield Grove, Bristol BS8 2BN,  
38 United Kingdom.  
39  
40  
41  
42  
43  
44  
45

46  
47 **Corresponding author:** Loubaba Mamluk, MRC Integrative Epidemiology Unit, School of  
48 Social and Community Medicine, University of Bristol, Oakfield House, Oakfield Grove, Bristol  
49 BS8 2BN, United Kingdom. NIHR CLAHRC West, University Hospitals Bristol  
50 NHS Foundation Trust, 9<sup>th</sup> Floor, Whitefriars, Lewins Mead Bristol, BS1 2NT. United Kingdom  
51 T+44 (0)117 3313378, l.mamluk@bristol.ac.uk  
52  
53  
54  
55  
56

**Author affiliations:**

- 1- MRC Integrative Epidemiology Unit at the University of Bristol, Bristol
- 2- School of Social and Community Medicine, University of Bristol, Bristol
- 3- NIHR CLAHRC West, University Hospitals Bristol NHS Foundation Trust, Bristol

**Word Count:** 3257**Figures:** 3**Tables:** 3**Supplementary Tables:** 3**Supplementary Figures:** 3**Number of references:** 53**What this paper adds****What is already known on this subject**

Until recently UK guidelines advised women to avoid drinking alcohol while trying to conceive, and in the first trimester, but at the same time indicated that consumption should be restricted to within “1 to 2 UK units, once or twice a week.

Despite the guidance on light drinking versus abstinence being the point of confusion for health professionals and pregnant women and contributing to inconsistent guidance and advice, previous reviews have reported on a range of “low/moderate” alcohol consumption levels in pregnancy and have not focused specifically on the threshold that current UK guidelines refer to.

Additionally, they did not specifically seek out study designs that reduce the impact of confounding and other forms of bias on the effect estimates.

**What this study adds**

We examined the effects of light alcohol consumption during pregnancy using the best quality evidence by only including studies with prospective assessment of exposure and prioritising results adjusted for main confounders.

We uniquely sought to include alternative study designs to further improve causal inference alongside standard analytical approaches.

We found very few studies employing either standard or alternative analytical approaches that answered the research question focussed on the specific range of exposure. Pooled estimates from these studies provided some evidence that even light alcohol consumption in pregnancy is associated with risk of preterm delivery and small for gestational age.

We found very little evidence to support recommendations of a 32g alcohol/week limit with respect to most outcomes.

## Abstract:

**Objectives:** To determine the effects of low-to-moderate levels of maternal alcohol consumption in pregnancy on pregnancy and longer-term offspring outcomes.

**Search Strategy:** Medline, Embase, Web of Science, and Psycinfo from inception to 11-07-2016.

**Selection Criteria:** Prospective observational studies, negative control and quasi-experimental studies of pregnant women estimating effects of light drinking in pregnancy ( $\leq 32\text{g/week}$ ) versus abstaining. Pregnancy outcomes such as birth weight, and features of fetal alcohol syndrome were examined.

**Data Collection and Analysis:** One reviewer extracted data and another checked extracted data. Random effects meta-analyses were performed where applicable, and a narrative summary of findings was carried out otherwise.

**Main Results:** 24 cohort and two quasi-experimental studies were included. With the exception of birth size and gestational age, there was insufficient data to meta-analyse or make robust conclusions. Being small-for-gestational-age (SGA) and preterm birth odds were higher for babies whose mothers consumed up to  $32\text{g/week}$  versus none, but estimates for preterm birth included the null value: summary odd ratios (OR) 1.08, 95% confidence intervals (CI) (1.02 to 1.14),  $I^2$  0%, OR 1.10, 95%CI (0.95 to 1.28),  $I^2$  60.2%, respectively.

**Conclusion:** Evidence of the effects of drinking  $\leq 32\text{g/w}$  in pregnancy is sparse. As there was some evidence that even light prenatal alcohol consumption is associated with being SGA and preterm delivery, guidance could advise abstention as a precautionary principle, but should explain the paucity of evidence.

**Keywords:** Alcohol, pregnancy, systematic review.

## Strengths and Limitations of this study:

### Strengths

- Completeness of searches with a focused research question aimed at informing alcohol in pregnancy guidelines.
- Biases minimised by only including those with prospective assessment of exposure and prioritising results adjusted for main confounders.
- Unique effort to include alternative study designs to further improve causal inference alongside standard analytical approaches.

### Limitations

- Limitation of results on the effects of light drinking in pregnancy from standard analytical approaches is bias due to residual confounding.
- The inclusion of only English language studies may have led to missing some studies, however there is little evidence that exclusion of non-English language studies leads to systematic bias in systematic reviews of conventional medicine.
- We could not pool eligible studies for various reasons (e.g. too few studies, lack of standard errors)

## Introduction

Alcohol is a known teratogen[1] and the evidence about the risks of heavy alcohol consumption during pregnancy on intellectual ability, birth defects, behaviour, fine motor skills, and mental health (comprising fetal alcohol spectrum disorder – FASD)[2] is clear and compelling.[3] Internationally, clinical guidelines recommend that pregnant women should abstain from heavy or “binge” drinking.[4] However, until recently UK guidelines advised women to avoid drinking alcohol while trying to conceive, and in the first trimester, but at the same time indicated that consumption should be restricted to within “1 to 2 UK units, once or twice a week”. [5] The UK Chief Medical Officer (CMO) commissioned a review of guidelines on alcohol consumption during pregnancy. Based on a review of reviews, the Guidelines Development Expert Group has recently proposed a change to guidelines such that women should be advised to abstain from alcohol when pregnant and/or trying to conceive,[6] based on the precautionary principle (i.e. “better safe than sorry”), in the absence of robust evidence.

Our aim was to conduct a comprehensive systematic review and meta-analysis of the literature to determine the effects of low-to-moderate levels of maternal alcohol consumption in pregnancy on pregnancy and longer term offspring outcomes. Here we report on alcohol consumption of up to two UK units of alcohol up to twice a week (the equivalent of ~ 32g/week), compared to no alcohol. In the absence of evidence from randomised controlled trials, we examine observational studies of pregnant women from the general population with prospective assessment of alcohol exposure, to reduce recall bias. In particular, we specifically seek out quasi-experimental studies, negative control comparisons, and Mendelian randomisation analyses in order to reduce the impact of confounding and measurement error on the effect estimates.

## Methods

### Selection strategy and selection criteria

A full protocol of this systematic review carried out using PRISMA guidelines[7] is available from the PROSPERO systematic review register (registration number CRD4201501594; [http://www.crd.york.ac.uk/PROSPERO/display\\_record.asp?ID=CRD42015015941](http://www.crd.york.ac.uk/PROSPERO/display_record.asp?ID=CRD42015015941)).

In brief, eligible studies were defined as epidemiological studies of pregnant women or women trying to conceive with prospective assessment of prenatal alcohol exposure (i.e. before birth), sampled from general population. The protocol specifically included studies using standard analytical approaches (e.g. multivariable regression analysis), as well as studies that used innovative analytical methods to improve causal inference, such as (i) quasi-experimental studies (for example comparing outcomes before and after implementation of new guidelines on alcohol consumption); (ii) negative control studies (e.g. comparing the association of offspring outcomes with maternal alcohol consumption to the association of the same outcomes with consumption among fathers, under the assumption that confounding is likely to be similar but that if there was a direct causal effect of maternal consumption on outcomes, maternal associations would be stronger); and Mendelian randomisation studies (using genetic variants associated with alcohol consumption and metabolism). We considered these analytical approaches to be the most appropriate in terms of their ability to minimise bias from confounding and other sources. Our original protocol included studies exploring the effects of prenatal alcohol consumption up to 83g/week (the commonly used threshold for moderate consumption [8-10]) versus abstinence. Here we have focused specifically on low alcohol consumption, i.e. up to 32g/week as this was the cut-off specified by the UK guidelines at the time of writing this review as being an implicitly “safe” threshold.[5] This specific cut off value has not been reviewed and is the main point of discussion as the guideline change from low consumption (equating to 1 to 2 UK units, once or twice a week or 32g/week) to abstinence.

1  
2  
3 Outcomes included: 1) pregnancy outcomes: still birth; miscarriage; gestational length and  
4 preterm delivery; hypertensive disorders of pregnancy; gestational diabetes; small for  
5 gestational age (SGA) and birth size (weight, length, and head circumference); low amniotic  
6 fluid (oligohydramnios); placenta previa; placental abruption; assisted delivery (including  
7 vacuum extraction, forceps delivery, Caesarean section); Apgar score at birth; admission to  
8 neonatal unit; congenital malformations. 2) Features of foetal alcohol spectrum disorder  
9 (FASD): childhood growth restriction; cranium size and head circumference; developmental  
10 delays; behaviour problems; cognitive impairment and intelligent quotient (IQ); facial  
11 malformations.  
12

13  
14  
15  
16  
17  
18  
19  
20  
21  
22 Studies were excluded if: there was no quantitative measure of alcohol consumption that  
23 could be converted to grams of alcohol/week; there was insufficient data to estimate the  
24 effect size of the association of our pre-defined low consumption categories versus  
25 abstinence with any outcome, including studies that analysed alcohol as a continuous  
26 variable (i.e. assuming the same linear or log linear effect across the entire alcohol  
27 distribution); the lowest exposure category (compared to non-drinkers) had an upper bound  
28 exceeding 32g/week, or was unspecified; they were cohort studies of pregnant women with  
29 alcohol abuse/dependency; they were case-control studies or cohort studies with  
30 retrospective alcohol consumption assessment (e.g. after birth).  
31

32  
33  
34  
35  
36  
37  
38  
39  
40 The following databases were searched: MEDLINE, PsycINFO, EMBASE on Ovid; the  
41 Cochrane Library including CENTRAL (the Cochrane Central Database of Controlled Trials)  
42 on Wiley Interscience; and Science Citation Index, Social Science Citation Index, on Web of  
43 Science from inception to 11 July 2016 (supplementary Table 1). We limited the search to  
44 English language papers and excluded animal studies, letters, editorials, and conference  
45 proceedings for which there were no full-text papers. Searches were tailored to each  
46 database by investigators. The search focused on published medical literature and did not  
47 include grey literature. We additionally performed manual searches of the reference lists of:  
48  
49  
50  
51  
52  
53  
54  
55  
56



1  
2  
3 (i) all papers included in recent systematic reviews of the effects of prenatal alcohol  
4 exposure on the outcomes of interest; and (ii) all recent papers citing those reviews.

5  
6  
7 Titles and abstracts, and full texts if necessary, were screened independently by two  
8 reviewers. Discrepancies were discussed and disagreements resolved through consensus.

9  
10 We assessed potential for bias in included studies by assessing how well the study adjusted  
11 for known confounders known to impact on the exposure-outcome associations (namely:  
12 socioeconomic positioning, smoking during pregnancy, maternal age, and ethnicity. We  
13 considered the potential for confounding and bias across studies included in the analyses  
14 and described it narratively alongside summary results.  
15  
16  
17  
18  
19  
20

### 21 Data extraction

22  
23 Data were extracted into a custom built Microsoft Access database. We extracted the  
24 following information from each study: title, authors, publication year, country/region, study  
25 design, population characteristics (sample size, methods of sampling, age distribution, and  
26 ethnicity), measures of exposure (assessment method; including timing and quantification of  
27 alcohol consumption, reference group, categories of exposure, and information on unit  
28 equivalence if stated), outcome assessment methods (including whether this was abstracted  
29 from medical records, obtained via a research interview and the person reporting the  
30 outcome e.g. parent, teacher, health professional, researcher or child), model adjustments,  
31 and study results. If a study reported more than one result for each outcome, we extracted  
32 all of them (e.g. relative to different timing of exposure, model adjustments, etc.). Information  
33 from each included paper was extracted by one reviewer (LM) and subsequently checked  
34 for accuracy and completeness by another reviewer (HE).[11] Extraction errors were minimal  
35 and were resolved through discussion between extractor and checker.  
36  
37  
38  
39  
40  
41  
42  
43  
44  
45  
46  
47  
48  
49  
50  
51  
52  
53  
54  
55  
56  
57  
58  
59  
60

### Alcohol unit conversion

Alcohol consumption in drinks/week was converted into grams/week based on the pure ethanol equivalent of one drink, as stated in each individual article, or otherwise inferred based on the definition of standard drinks in the country where the study took place.

### Data analysis

The association of low alcohol use with pregnancy and related outcomes was investigated comparing the highest category within the range of 0-32g/week to abstinence (during pregnancy). In studies providing data across several categories of intake within the 0-32g/week range, we used the effect estimate for the highest category of intake. If studies reported on exposure to alcohol during different trimesters, we included estimates relative to the earliest exposure. Similarly, if results were available from both unadjusted and adjusted regressions, we prioritised fully adjusted results, as a way of minimising the impact of confounding by important factors such as maternal smoking, age, socio-economic position and ethnicity. In case of multiple results from the same cohort (relative to the same outcome), we analysed those pertaining to the largest population size (i.e. conducted on the least 'selected' population as result of exclusions, to minimise selection bias). Results from all studies that fulfilled our inclusion criteria were summarised, together with information about the study. Where appropriate, we additionally pooled results for each outcome.

Authors were not contacted for extra data.

Individual study estimates were pooled using random effects meta-analysis. When continuous outcomes were measured using different scales, we derived and pooled Cohen's d statistics (representing standardised differences in means by level of exposure). Where only two studies were available to meta-analyse, results were pooled unless they were very different from each other ( $I^2 \geq 50\%$ ).<sup>[12]</sup> In this case, a narrative summary of findings was carried out and results were reported in Table 2. Where a study only reported unadjusted results, we kept these separate in the forest plots (sub-group analysis) but then also showed overall pooled estimates combining all results.

1  
2  
3 Planned sub-group analyses by trimester could not be performed due to insufficient number  
4 of included studies with this information.  
5

6  
7 The likelihood of small study bias deriving from publication bias was assessed through visual  
8 inspection of funnel plots for pooled analyses including  $\geq 4$  studies.  
9

10  
11 Statistical analyses were carried out using Stata version 13.1 (StataCorp, College Station,  
12 TX, USA).[13]  
13

## 14 15 Results

16 A flowchart of the article review process is shown in Figure 1. A total of 4680 citation records  
17 were identified from searching the four relevant databases. A manual search of recent  
18 systematic reviews identified 33 additional articles. After exclusions, 24 prospective studies  
19 analysed using standard approaches and two quasi-experimental studies were included,  
20 reporting on 30 outcomes in total.  
21  
22  
23  
24  
25  
26

### 27 Standard analytical approaches

28 Pooled estimates for continuous and binary outcomes are presented in Figure 2 and 3  
29 respectively.  
30

31  
32 The outcome reported by the largest number of studies was preterm delivery (9 studies, for a  
33 total of 318832 participants, Figure 3A), followed by birthweight and SGA (7 studies each,  
34 Figures 2 and 3B), and low birthweight (5 studies, Figure 3C).  
35  
36

37 The meta-analysis yielded a summary OR of 1.10 (95% CI 0.95; 1.28) for preterm delivery,  
38 but there was substantial statistical heterogeneity between studies ( $I^2=60.2\%$ ), due to a large  
39 Danish study reporting a protective effect (Figure 3A). There was also modest evidence for  
40 an increased risk of being SGA (OR 1.08, 95% CI 1.02; 1.14) for a total of 288512  
41 participants, although this was almost entirely driven by a single US study contributing 95%  
42 of the participants to this meta-analysis (Figure 3B). The birthweight meta-analysis yielded a  
43 summary effect of -13.9g (95% CI -13.49g; +3.31g) for offspring of light drinkers versus non-  
44 drinkers (Figure 2).  
45  
46  
47  
48  
49  
50  
51  
52  
53  
54

1  
2  
3 Other outcomes were typically reported by a limited number of studies and mostly could not  
4 be meta-analysed due to clinical heterogeneity in outcome assessment or incompleteness of  
5 published data (supplementary Figure 1, and Table 2). Based on two studies with data on  
6 behavioural outcomes, there was little evidence of any effect for internalising symptoms but  
7 a suggestion that light drinking in pregnancy protected against high externalising behaviour  
8 scores (OR 0.97, (95%CI 0.93; 1.01, supplementary Figure 1)). However, an additional  
9 study assessing conduct problems and hyperactivity (in the same externalising domain)  
10 reported results in the opposite direction, which could not be meta-analysed due to different  
11 outcome definitions.  
12

13 Table 2 presents results of included studies that did not contribute to the meta-analyses for  
14 various reasons. There was no strong evidence of association between consuming up to 32  
15 g/week of alcohol and any of the remaining outcomes excluded from meta-analyses, with  
16 three exceptions: a very large US study showing increased risk of placental abruption and  
17 decreased risk of pre-eclampsia (OR 1.24, 95%CI 1.05; 1.46 and OR 0.82, 95% CI 0.74;  
18 0.90, respectively)[14], and a single British study reporting better cognitive outcomes in  
19 children exposed to light maternal drinking in pregnancy.[15]  
20

21 For outcomes with a sufficient number of studies ( $\geq 4$  studies), there was little evidence of  
22 small study effect based on inspection of funnel plots (supplemental Figures 2-5), with only  
23 preterm birth showing some asymmetry due to the three smallest studies showing point  
24 estimates in the direction of increased risk (supplementary Figure 2).  
25

26 Of all included results, only two were unadjusted[16 17], and most of the others were  
27 adjusted for maternal smoking, age and socio-economic position (supplementary Table 2).  
28

29 Studies that did not adjust for ethnicity were generally conducted in homogenous  
30 populations. Due to the small number of studies for each outcome, we could not further  
31 investigate the effect of adjusting for all or some of these confounders. Similarly, there was  
32 insufficient data to examine the effect of timing of exposure on outcomes.  
33  
34  
35  
36  
37  
38  
39  
40  
41  
42  
43  
44  
45  
46  
47  
48  
49  
50  
51  
52  
53  
54  
55  
56  
57  
58  
59  
60

### Alternative analytical approaches

Two negative control publications[18] based on the same UK cohort met our inclusion criteria.[17 19] They investigated the effects of maternal alcohol consumption on childhood educational achievement[19] and IQ.[17] Offspring exposed to maternal consumption of <12g/week of alcohol in the first trimester did not have worse outcomes compared to those of mothers who abstaining from alcohol, and a similar pattern was found for paternal alcohol consumption.

One further quasi-experimental study, one natural experiment and five Mendelian randomisation studies were excluded from the present review because they did not specifically test the effect of consuming up to 32g/week in pregnancy versus abstaining.

These will be included in a forthcoming review focused on estimating the causal effects of prenatal alcohol exposure based on alternative study designs and analytical approaches to strengthen causal evidence.

**Table 1.** Prospective studies examining the effects of prenatal alcohol exposure on pregnancy outcomes (studies included in the meta-analysis)

| Study (year)          | Country     | Number in analysis | Outcomes                                                                                                                                                                                                                                           | Age at outcome assessment (child) | Adjusted (yes/no) |
|-----------------------|-------------|--------------------|----------------------------------------------------------------------------------------------------------------------------------------------------------------------------------------------------------------------------------------------------|-----------------------------------|-------------------|
| [20] Lundsberg (2015) | USA         | 3,916              | Birth weight (<2500g)<br>SGA (< 10 <sup>th</sup> percentile)                                                                                                                                                                                       | Birth                             | Yes               |
| [21] Nykjaer (2014)   | UK          | 535                | Birth weight (g)<br>Customised birth centile<br>SGA (< 10 <sup>th</sup> centile)<br>Low birth weight <2500g                                                                                                                                        | Birth                             | Yes               |
| [22] Niclasen (2014)  | Denmark     | 5,710              | Preterm birth<br>10% with highest problem scores, Strengths & Difficulties Questionnaire (SDQ),<br>Parent report<br>Boys Internalising behaviour<br>Girls Internalising behaviour<br>Boys Externalising behaviour<br>Girls Externalising behaviour | 7 years                           | Yes               |
| [23] Miyake (2014)    | Japan       | 1,493              | Preterm birth<br>SGA (< 10 <sup>th</sup> percentile)<br>Adjusted mean birth weight<br>Low birth weight                                                                                                                                             | 0-11 months                       | Yes               |
| [14] Salihi (2011)    | USA         | 276,288            | Preterm birth<br>SGA (< 10 <sup>th</sup> percentile)                                                                                                                                                                                               | Birth                             | Yes               |
| [24] Robinson (2010)  | Australia   | 1849               | Clinically significant problems (T score ≥60), Child Behaviour Checklist (CBCL)<br>Parent report<br>Internalising behaviour<br>Externalising behaviour                                                                                             | 2-14 years inclusive              | Yes               |
| [25] Jaddoe (2007)    | Holland; UK | 4,132              | Low birth weight<br>SGA (weight < -2 standard deviation scores)<br>Preterm birth<br>Birth weight                                                                                                                                                   | Birth                             | Yes               |
| [26] Sayal (2007)     | UK          | 720                | 10% with highest problem scores, Strengths & Difficulties Questionnaire (SDQ)<br>parent report <i>Hyperactivity</i> - Externalising                                                                                                                | 7.75 years                        | Yes               |
| [26] Sayal (2007)     | UK          | 700                | 10% with highest problem scores, Strengths & Difficulties Questionnaire (SDQ)<br>parent report <i>Conduct problems</i> - Externalising                                                                                                             | 7.75 years                        | Yes               |
| [27] Albertsen (2004) | Denmark     | 29,463             | Preterm birth (<37 weeks)<br>Moderate preterm birth (32-37 weeks)<br>Very preterm birth (<32 weeks)                                                                                                                                                | Birth                             | Yes               |
| [28] Lundsberg (1997) | USA         | 2,063              | SGA (lowest 10 <sup>th</sup> percentile)<br>Low birth weight<br>Preterm delivery                                                                                                                                                                   | Birth                             | Yes               |
| [29] Passaro (1996)   | UK          | 7,052              | Birth weight (g)                                                                                                                                                                                                                                   | Birth                             | Yes               |
| [30] Shu (1995)       | USA         | 398                | Birth weight (g)                                                                                                                                                                                                                                   | Birth                             | Yes               |
| [16] Peacock (1995)   | UK          | 901                | Preterm birth <37 weeks                                                                                                                                                                                                                            | Birth                             | No                |
| [31] Olsen (1991)     | Denmark     | 11,698             | Birth weight (<2500g)                                                                                                                                                                                                                              | Birth                             | yes               |
| [32] Brooke (1989)    | UK          | 1,140              | Birthweight                                                                                                                                                                                                                                        | Birth                             | yes               |

SGA :small for gestation age

**Table 2.** Prospective studies examining the effects of prenatal alcohol exposure on pregnancy outcomes (results not included in the meta-analysis)

| Outcome                                                 | Study (year)          | Country (sample size)                                                    | Outcome details                                          | Reason not included in meta-analysis  | Age at outcome assessment (child)                                               | Results <sup>[1]</sup>                                                                                | Adjusted (yes/no) |
|---------------------------------------------------------|-----------------------|--------------------------------------------------------------------------|----------------------------------------------------------|---------------------------------------|---------------------------------------------------------------------------------|-------------------------------------------------------------------------------------------------------|-------------------|
| <b>Malformations</b>                                    | [20] Lundsberg (2015) | USA (4,496)                                                              | Major malformations                                      | Only study with this outcome          | Birth                                                                           | OR 0.78 (95% CI 0.40 – 1.50)                                                                          | Yes               |
|                                                         | [33] Bille (2007)     | Denmark (1020)                                                           | Oral clefts                                              | Only study with this outcome          | Birth                                                                           | OR 1.06 (95% CI 0.74 – 1.50)                                                                          | Yes               |
|                                                         | [34] Ernhart (1989)   | USA (873)                                                                | Craniofacial anomalies                                   | SE/SD not reported                    | Birth                                                                           | Mean craniofacial anomalies was 1.92 for those exposed, compared to 1.85 for those unexposed (p=0.26) | Yes               |
|                                                         | [34] Ernhart (1989)   | USA (873)                                                                | Total anomalies                                          | SE/SD not reported                    | Birth                                                                           | Mean total anomalies was 2.60 for those exposed, compared to 2.53 for those unexposed (p=0.28)        | Yes               |
| <b>Gestational age and preterm birth</b>                | [29] Passaro (1996)   | UK (10,539)                                                              | Gestational age                                          | Only study with this outcome          | Birth                                                                           | Mean gestational age 40.1 (SD 1.9) for those exposed, compared to 40.1 (SD 2.0) for those unexposed.  | Yes               |
|                                                         | [35] Ogston (1992)    | Netherlands, Scotland, France, Spain, Denmark, Germany, Portugal (8,453) | Per cent of infants with gestational age <37 weeks       |                                       |                                                                                 | 3.7% in those exposed compared to 3.9% in those unexposed.                                            | Yes               |
| <b>Birthweight</b>                                      | [35] Ogston (1992)    | Netherlands, Scotland, France, Spain, Denmark, Germany, Portugal (8,453) | Mean birthweight (g) in non-smokers                      | SE/SD not reported                    | Birth                                                                           | 3414g in those exposed, compared to 3363g in those unexposed.                                         | Yes               |
|                                                         | [35] Ogston (1992)    | Netherlands, Scotland, France, Spain, Denmark, Germany, Portugal (8,453) | Mean birthweight (g) in smokers                          | SE/SD not reported                    | Birth                                                                           | 3225g in those exposed, compared to 3225g in those unexposed.                                         | Yes               |
| <b>Height</b>                                           | [20] Lundsberg (2015) | USA (4,496)                                                              | Lowest 10 <sup>th</sup> percentile of birth length       | Only study with this outcome          | Birth                                                                           | OR 1.10 (95% CI 0.78 – 1.54)                                                                          | Yes               |
| <b>Head circumference</b>                               | [20] Lundsberg (2015) | USA (4,496)                                                              | Lowest 10 <sup>th</sup> percentile of head circumference | Only study with this outcome          | Birth                                                                           | OR 1.08 (95% CI 0.83 – 1.42)                                                                          | Yes               |
| <b>Apgar score</b>                                      | [20] Lundsberg (2015) | USA (4,496)                                                              | Apgar <7 at 5 minutes                                    | Only study with this outcome          | Birth                                                                           | OR 1.61 (95% CI 0.67 – 3.84)                                                                          | Yes               |
| <b>Admission to Neonatal Intensive Care Unit (NICU)</b> | [20] Lundsberg (2015) | USA (4,496)                                                              | Admission to NICU                                        | Only study with this outcome          | Birth                                                                           | OR 1.12 (95% CI 0.86 – 1.46)                                                                          | Yes               |
| <b>Miscarriage</b>                                      | [36] Andersen (2012)  | Denmark (89,322)                                                         | Miscarriage in first trimester                           | Only study with this outcome          | (Outcome confirmed via National / Hospital Registries, or from maternal report) | OR 1.05 (95% CI 0.94 – 1.18)                                                                          | Yes               |
|                                                         | [37] Windham (1997)   | USA (5,324)                                                              | Spontaneous abortion occurring ≤20 weeks gestation       | Only study with this outcome          | (Outcome confirmed via medical records)                                         | OR 1.0 (95% CI 0.7 – 1.5)                                                                             | Yes               |
| <b>Stillbirth</b>                                       | [36] Andersen (2012)  | Denmark (89,322)                                                         | Stillbirth                                               | Estimates are in different directions | (Outcome confirmed via National / Hospital Registries, or from maternal report) | OR 0.90 (95% CI 0.73 – 1.12)                                                                          | Yes               |
|                                                         | [14] Salihu (2011)    | USA (1,226,685)                                                          | Stillbirth                                               | Estimates are in different directions | Birth                                                                           | OR 1.10 (95% CI 0.88 – 1.39)                                                                          | Yes               |

|  |                               |                          |                                                                          |                                                                                                                      |                                        |               |                                                                                                         |     |
|--|-------------------------------|--------------------------|--------------------------------------------------------------------------|----------------------------------------------------------------------------------------------------------------------|----------------------------------------|---------------|---------------------------------------------------------------------------------------------------------|-----|
|  | <b>Placenta-related</b>       | [14] Salihi (2011)       | USA (1,226,685)                                                          | Placental abruption                                                                                                  | Only study with this outcome           | Birth         | OR 1.24 (95% CI 1.05 – 1.46)                                                                            | Yes |
|  |                               | [14] Salihi (2011)       | USA (1,226,685)                                                          | Placenta previa                                                                                                      | Only study with this outcome           | Birth         | OR 1.11 (95% CI 0.87 – 1.43)                                                                            | Yes |
|  | <b>Pre-eclampsia</b>          | [14] Salihi (2011)       | USA (1,226,685)                                                          | Pre-eclampsia                                                                                                        | Only two studies with this outcome     | Birth         | OR 0.82 (95% CI 0.74 – 0.90)                                                                            | Yes |
|  |                               | [38] McCarthy (2013)     | New Zealand, Australia, Ireland, UK                                      | Pre-eclampsia                                                                                                        | Only two studies with this outcome     | Birth         | OR 0.59 (95% CI 0.35 – 0.99)                                                                            | Yes |
|  | <b>Motor development</b>      | [39] Faebo Larsen (2013) | Denmark (32,097)                                                         | Developmental Coordination Disorder (DCD)                                                                            | Only study with this outcome           | 7 years       | OR 0.85 (95% CI 0.70 – 1.03)                                                                            | Yes |
|  | <b>Behaviour /development</b> | [26] Sayal (2007)        | UK (967)                                                                 | 10% with highest problem scores, Strengths & Difficulties Questionnaire (SDQ) parent report <i>Conduct problems</i>  | Later age used in analysis             | 3.9 years     | OR 1.14 (95% CI 0.98 – 1.32)                                                                            | Yes |
|  |                               | [26] Sayal (2007)        | UK (1077)                                                                | 10% with highest problem scores, Strengths & Difficulties Questionnaire (SDQ) parent report <i>Hyperactivity</i>     | Later age used in analysis             | 3.9 years     | OR 0.99 (95% CI 0.86 – 1.16)                                                                            | Yes |
|  |                               | [26] Sayal (2007)        | UK (257)                                                                 | 10% with highest problem scores, Strengths & Difficulties Questionnaire (SDQ) teacher report <i>Conduct problems</i> | Parent report used in analysis instead | 7.75- 9 years | OR 1.41 (95% CI 1.02– 1.94)                                                                             | Yes |
|  |                               | [26] Sayal (2007)        | UK (525)                                                                 | 10% with highest problem scores, Strengths & Difficulties Questionnaire (SDQ) teacher report <i>Hyperactivity</i>    | Parent report used in analysis instead | 7.75- 9 years | OR 1.20 (95% CI 0.96– 1.51)                                                                             | Yes |
|  |                               | [40] Parry (1992)        | Netherlands, Scotland, France, Spain, Denmark, Germany, Portugal (8,453) | Mental Development Index, Bayley Scales of Infant Development                                                        | No SE/SD reported for reference group  | 18 months     | Mean increase of 1.80 points (SE 1.1) for those exposed compared to unexposed.                          | Yes |
|  |                               | [40] Parry (1992)        | Netherlands, Scotland, France, Spain, Denmark, Germany, Portugal (8,453) | Psychomotor Development Index, Bayley Scales of Infant Development                                                   | No SE/SD reported for reference group  | 18 months     | Mean increase of 0.81 points (se 0.8) for those exposed compared to unexposed.                          | Yes |
|  | <b>Cognition</b>              | [15] Sayal (2013)        | UK (10,558)                                                              | Key Stage 2 scores                                                                                                   | Only study with this outcome           | 11 years      | Mean increase of 0.38 (95% CI -0.02 – 0.78) on KS2 score for those exposed compared to unexposed.       | Yes |
|  |                               | [17] Alati (2008)        | UK (4,332)                                                               | IQ, Weschler Intelligence Scale for Children (WISC-III)                                                              | Only study with this outcome           | 8 years       | Mean IQ score 106.4 (SD 16.3) in those exposed, compared to 105.7 (SD 16.2) in those unexposed, p=0.10. | No  |

[1] Odds Ratio results compare the odds of outcome in those exposed to  $\leq 32g$  AA per week. SE: Standard error SD: standard deviation SGA :small for gestation age IQ: intelligence quotient.



1  
2  
3  
4  
5  
6  
7  
8  
9  
10  
11  
12  
13  
14  
15  
16  
17  
18  
19  
20  
21  
22  
23  
24  
25  
26  
27  
28  
29  
30  
31  
32  
33  
34  
35  
36  
37  
38  
39  
40  
41  
42  
43  
44  
45  
46  
47  
48  
49

For peer review only

1  
2  
3  
4  
5  
6  
7  
8  
9  
10  
11  
12  
13  
14  
15  
16  
17  
18  
19  
20  
21  
22  
23  
24  
25  
26  
27  
28  
29  
30  
31  
32  
33  
34  
35  
36  
37  
38  
39  
40  
41  
42  
43  
44  
45  
46  
47  
48  
49

Table 3. Quasi-experimental studies examining the effects of prenatal alcohol exposure on pregnancy outcomes.

| Study (year)      | Country | Sample size | Study type                   | Gene | SNP-rs number | Age at outcome assessment (child) | Outcomes                                                | Summary of results & conclusions as presented in the paper                                                                                                                                               | Limitations                                                                                            |
|-------------------|---------|-------------|------------------------------|------|---------------|-----------------------------------|---------------------------------------------------------|----------------------------------------------------------------------------------------------------------------------------------------------------------------------------------------------------------|--------------------------------------------------------------------------------------------------------|
| [19] Alati (2013) | UK      | 7,062       | Maternal-paternal comparison | na   | na            | 11 years                          | Academic achievement: Key Stage 2 scores (standardised) | Maternal alcohol consumption abstainers: mean 102.0 (SD 9.1); <1 glass/week: mean 102.8 (SD 8.7)<br>Paternal alcohol consumption abstainers: mean 98.9 (SD 11); <1 glass/week: mean 101.1 (SD 9.1)       | Different confounding structures for the association of maternal vs. paternal alcohol with the outcome |
| [17] Alati (2008) | UK      | 4,332       | Maternal-paternal comparison | na   | na            | 8 years                           | IQ: Wechsler Intelligence Scale for Children (WISC)     | Maternal alcohol consumption abstainers: mean 105.7 (SD 16.2); <1 glass/week: mean 106.4 (SD 16.3)<br>Paternal alcohol consumption abstainers: mean 102.2 (SD 16.8); <1 glass/week: mean 104.0 (SD 16.7) | Different confounding structures for the association of maternal vs. paternal alcohol with the outcome |

Abbreviations: OR: Odds ratio CI: Confidence intervals MD: Mean difference SD: standard deviation IQ: Intelligence quotient.

## Discussion

Main findings: We conducted a comprehensive systematic review of the literature aimed at examining whether low levels of alcohol drinking in pregnancy have a causal detrimental effect on pregnancy and offspring outcomes. Our two main findings are: i) a surprisingly limited number of prospective studies specifically addressing the question of whether light maternal alcohol consumption (i.e. up to 32g/week (or 4 UK units) has any causal effect (adverse or beneficial) on infant and later offspring outcomes and pregnancy outcomes, and, as a result, ii) a paucity of evidence demonstrating a clear detrimental effect, or safe limit, of light alcohol consumption on outcomes. The upper limit that we chose to examine here is that of the current version of the UK National Institute for Health and Care Excellence (NICE) guidelines.[41] The question we have attempted to address is very important given the mixed advice that women are given with regards to whether they should abstain completely or be allowed light alcohol consumption in pregnancy. The lack of research evidence to address this question is notable.

Strengths and limitations: Strengths of this review include the completeness of searches with a focused research question aimed at informing alcohol in pregnancy guidelines. In addition to observational studies' biases minimised by only including those with prospective assessment of exposure and prioritising results adjusted for main confounders. Another strength of this review is the unique effort to include alternative study designs to further improve causal inference alongside standard analytical approaches. The main limitation of results on the effects of light drinking in pregnancy from standard analytical approaches is bias due to residual confounding. Women who drink low amounts of alcohol may be more likely to be of higher socio-economic position, compared to abstainers, at least in developed settings in recent years,[42] and both of these characteristics are associated with better pregnancy and cognitive outcomes.[43] Maternal smoking and ethnicity are also known correlates of maternal alcohol use, and risk factors for e.g. low birth weight.[44] Most studies included in this review adjusted for at least some of these factors. However, due to the small

1  
2  
3 number of studies included for any given outcome, it was impossible to formally investigate  
4 the effect of incomplete adjustment for some (or all) of these confounders. Additionally, for  
5 most outcomes, we could not pool eligible studies for various reasons (e.g. too few studies,  
6 lack of standard errors) and that we limited our review to a number of pre-specified  
7 outcomes including the most common pregnancy-related outcomes and childhood outcomes  
8 related to FASD. The inclusion of only English language studies may have led to missing  
9 some studies, however there is little evidence that exclusion of non-English language studies  
10 leads to systematic bias in systematic reviews of conventional medicine.[45-48]  
11  
12  
13  
14  
15  
16  
17  
18  
19

20  
21 Interpretation: This review demonstrates the paucity and poor quality of evidence addressing  
22 this important public health question, and the difficulty of designing studies that can  
23 effectively evaluate the causal impact of low alcohol consumption whilst minimising bias and  
24 confounding. It also shows the value of reporting measures of effect for meaningful  
25 categories of the exposure. Whilst many studies reported that associations did not differ from  
26 linearity prior to providing a single coefficient for the dose-response association, it is possible  
27 that statistical power limited the ability to detect non-linear associations in single studies.  
28 Such detail is especially important when there are controversies about the shape of the  
29 association of interest (linear, U or J-shaped) and/or the existence of safe thresholds.  
30 Outstanding questions also remain about the effects of maternal alcohol consumption at  
31 different stages of conception and pregnancy. Alternative analytical approaches such as  
32 sibling comparisons[49] and the use of instrumental variable approaches[50] as well as  
33 triangulating the totality of evidence from multiple study types[51] (formally or informally) are  
34 needed in order to strengthen confidence in the direction and size of any potential causal  
35 relationships.  
36  
37  
38  
39  
40  
41  
42  
43  
44  
45  
46  
47  
48  
49  
50

51  
52  
53 The recently proposed change in the guidelines for alcohol use in pregnancy in the UK to  
54 complete abstinence, would be an application of the precautionary principle. This review  
55 confirmed some increased risk of babies being born SGA but little direct evidence of any  
56  
57  
58  
59  
60

1  
2  
3 other detrimental effect for maternal drinking up to 32g/week. However, there have been few  
4 well-conducted studies examining this specific category of exposure. This issue remains of  
5 great public health importance, with alcohol consumption during pregnancy prevalent in the  
6 UK, Ireland, New Zealand and Australia and reaching up to 80% of pregnant women.[52] For  
7 some, the evidence of the potential for harm – mostly coming from animal experiments and  
8 human studies of effects due to higher levels of exposure will be sufficient to advocate that  
9 guidelines should advise women to avoid all alcohol in pregnancy, while others will wish to  
10 retain the existing wording of guidelines.[53]  
11  
12  
13  
14  
15  
16  
17  
18  
19  
20

21  
22 In conclusion, we found limited evidence for a causal role of light drinking in pregnancy,  
23 compared to abstaining, on most of the outcomes examined. Despite the distinction between  
24 light drinking and abstinence being the point of most tension and confusion for health  
25 professionals and pregnant women and contributing to inconsistent guidance and advice  
26 now and in the past, our extensive review shows that this specific question is not being  
27 researched thoroughly enough, if at all. In addition, there has been no evidence regarding  
28 possible benefits of light alcohol consumption versus absence. Further studies, including  
29 those using designs that improve causal inference, are required to provide further evidence  
30 and a better estimation of the likely effects, in particular to inform expectant women who  
31 choose not to follow the new recommendation for abstinence or are anxious about their  
32 drinking in the very early stages before pregnancy recognition. Formulating guidance on the  
33 basis of the current evidence is challenging. However, describing the paucity of current  
34 research and explaining that “absence of evidence is not evidence of absence”, appears  
35 warranted.  
36  
37  
38  
39  
40  
41  
42  
43  
44  
45  
46  
47  
48  
49  
50  
51  
52  
53  
54  
55  
56  
57  
58  
59  
60

### Acknowledgments

We thank our colleagues from NIHR CLAHRC West who provided support that greatly assisted the research. We thank Louise Waters for assistance with article collection and Alison Richards for developing the search strategy for this review.

### Details of contributors

Loubaba Mamluk: Drafting the protocol, preparing the data extraction database, data screening and collection (lead reviewer), data analysis, figures, tables, data interpretation, and drafting the manuscript. Hannah B Edwards: screening, data collection, data quality checking, data interpretation, and preparation of final manuscript. Theresa HM Moore: Advising on the protocol, preparing the protocol, screening title and abstract. Timothy Jones: Data extraction and full text screening. Sharea Ijaz: Abstract and full text screening. Jelena Savović: protocol development/study design (including the development of searching, article screening and data collection strategies), oversaw and managed the review process and the review team, provided methodological advice for the review and meta-analysis conduct, and critically revised the manuscript. George Davey Smith: Obtained funding, formulation of project plan, review of progress and of the manuscript. Jenny L. Donovan: Obtained funding and contributed to drafting the manuscript, and approved the final version. Verity Leach: Data extraction. Deborah A. Lawlor: contributed to the study design, data interpretation and review of earlier manuscript drafts; she approved the final version that has been submitted. Sarah J. Lewis: contributed to the study design, data interpretation and review of earlier manuscript drafts; she approved the final version that has been submitted. Abigail Fraser: Contributed to the study design, data analysis and interpretation and drafting of manuscript. Luisa Zuccolo: Contributed to the study design, data analysis and interpretation and drafting of manuscript. I, Loubaba Mamluk, the corresponding author of this manuscript, certify that I have full access to all the data in the study and had final responsibility for the decision to submit for publication.

### Transparency declaration

I, Loubaba Mamluk, the corresponding author of this manuscript, affirm that this manuscript is an honest, accurate, and transparent account of the study being reported; that no important aspects of the study have been omitted; and that any discrepancies from the study as planned (and, if relevant, registered) have been explained.

### Conflict of interest:

The authors have nothing to disclose.

1  
2  
3 This work has not been submitted for publication elsewhere.  
4  
5

### 6 **Disclosure**

7 All authors have completed the ICMJE uniform disclosure form  
8 at [www.icmje.org/coi\\_disclosure.pdf](http://www.icmje.org/coi_disclosure.pdf) and declare: no support from any organisation for the  
9 submitted work; no financial relationships with any organisations that might have an interest  
10 in the submitted work in the previous three years; no other relationships or activities that  
11 could appear to have influenced the submitted work.  
12  
13  
14

### 15 **Role of funding source:**

16  
17 The UK Medical Research Council (MC\_UU\_12013/1 and MC\_UU\_12013/5) and the  
18 University of Bristol provide core funding for the MRC Integrative Epidemiology Unit; LM,  
19 DAL, GDS, AF, and LZ are partially or fully funded through this. AF and LZ are UK Medical  
20 Research Council research fellowships (Grant refs: MR/M009351/1 and G0902144,  
21 respectively). LM, JS, HE, VL, TJ, SI, TM and JLD are fully or partially partly funded by  
22 National Institute for Health Research (NIHR) Collaboration for Leadership in Applied Health  
23 Research and Care West (CLAHRC West) at University Hospitals Bristol NHS Foundation  
24 Trust. DAL (NF-SI-0611-10196) and JLD (NF-SI-0512-10119) are NIHR Senior  
25 Investigators. SL is a senior lecturer funded by HEFCE. The views expressed here are those  
26 of the author(s) and not necessarily those of the NHS, the MRC, NIHR or the Department of  
27 Health. I, Loubaba Mamluk, the corresponding author of this manuscript, certify that I have  
28 full access to all the data in the study and had final responsibility for the decision to submit  
29 for publication.  
30  
31  
32  
33  
34  
35  
36  
37  
38  
39

### 40 **Transparency declaration**

41 The lead author (Loubaba Mamluk) affirms that this manuscript is an honest, accurate, and  
42 transparent account of the study being reported; that no important aspects of the study have  
43 been omitted; and that any discrepancies from the study as planned (and, if relevant,  
44 registered) have been explained.  
45  
46  
47  
48  
49  
50  
51  
52  
53  
54  
55  
56  
57  
58  
59  
60

## References

1. Streissguth AP, Landesman-Dwyer S, Martin JC, Smith DW. Teratogenic effects of alcohol in humans and laboratory animals. *Science (New York, N.Y.)* 1980;**209**(4454):353-61
2. Popova S, Lange S, Shield K, et al. Comorbidity of fetal alcohol spectrum disorder: a systematic review and meta-analysis. *Lancet (London, England)* 2016;**387**(10022):978-87 doi: 10.1016/s0140-6736(15)01345-8[published Online First: Epub Date]].
3. Chudley AE, Conry J, Cook JL, Looock C, Rosales T, LeBlanc N. Fetal alcohol spectrum disorder: Canadian guidelines for diagnosis. *CMAJ : Canadian Medical Association journal = journal de l'Association medicale canadienne* 2005;**172**(5 Suppl):S1-s21 doi: 10.1503/cmaj.1040302[published Online First: Epub Date]].
4. International Alliance for Responsible Drinking- Drinking guidelines for pregnancy and breast feeding. 2016
5. (NICE) NIFHACE. Antenatal care. CG62. NICE 2008
6. Department of Health. Alcohol Guidelines Review – Report from the Guidelines development group to the UK Chief Medical Officers. 2016
7. Moher D, Liberati A, Tetzlaff J, Altman DG. Preferred reporting items for systematic reviews and meta-analyses: the PRISMA statement. *Annals of internal medicine* 2009;**151**(4):264-69
8. Hamlyn B OK, Wands S. *Infant Feeding 2000*. London: The Stationery Office, 2002.
9. Henderson J, Gray R, Brocklehurst P. Systematic review of effects of low–moderate prenatal alcohol exposure on pregnancy outcome. *Bjog* 2007;**114**(3):243-52
10. Patra J, Bakker R, Irving H, Jaddoe VW, Malini S, Rehm J. Dose–response relationship between alcohol consumption before and during pregnancy and the risks of low birthweight, preterm birth and small for gestational age (SGA)—a systematic review and meta-analyses. *Bjog* 2011;**118**(12):1411-21
11. Dissemination CfRa. CRD’s guidance for undertaking reviews in health care. York Publishing Services Ltd 2009:32
12. Higgins J, Green S. *Cochrane handbook for systematic reviews of interventions version 5.1. 0* [updated Mar 2011]. The Cochrane collaboration. 2011, 2012.
13. StataCorp. *Stata Statistical Software: release 12*. College Station TSL, 2015.
14. Salihu HM, Kornosky JL, Lynch O, Alio AP, August EM, Marty PJ. Impact of prenatal alcohol consumption on placenta-associated syndromes. *Alcohol* 2011;**45**(1):73-9 doi: <http://dx.doi.org/10.1016/j.alcohol.2010.05.010>[published Online First: Epub Date]].
15. Sayal K, Draper ES, Fraser R, Barrow M, Davey Smith G, Gray R. Light drinking in pregnancy and mid-childhood mental health and learning outcomes. *Arch Dis Child* 2013;**98**(2):107-11 doi: <http://dx.doi.org/10.1136/archdischild-2012-302436>[published Online First: Epub Date]].
16. Peacock JL, Bland JM, Anderson HR. Preterm delivery: effects of socioeconomic factors, psychological stress, smoking, alcohol, and caffeine. *Bmj* 1995;**311**(7004):531-5
17. Alati R, Macleod J, Hickman M, et al. Intrauterine exposure to alcohol and tobacco use and childhood IQ: findings from a parental-offspring comparison within the Avon Longitudinal Study of Parents and Children. *Pediatr Res* 2008;**64**(6):659-66 doi: <http://dx.doi.org/10.1203/PDR.0b013e318187cc31>[published Online First: Epub Date]].
18. Lipsitch M, Tchetgen ET, Cohen T. Negative controls: a tool for detecting confounding and bias in observational studies. *Epidemiology (Cambridge, Mass.)* 2010;**21**(3):383
19. Alati R, Davey Smith G, Lewis SJ, et al. Effect of prenatal alcohol exposure on childhood academic outcomes: contrasting maternal and paternal associations in the ALSPAC study. *PLoS ONE* 2013;**8**(10):e74844 doi: <http://dx.doi.org/10.1371/journal.pone.0074844>[published Online First: Epub Date]].
20. Lundsberg LS, Illuzzi JL, Belanger K, Triche EW, Bracken MB. Low-to-moderate prenatal alcohol consumption and the risk of selected birth outcomes: a prospective cohort study. *Ann*



- Epidemiol 2015;**25**(1):46-54.e3 doi:  
<http://dx.doi.org/10.1016/j.annepidem.2014.10.011>[published Online First: Epub Date]].
21. Nykjaer C, Alwan NA, Greenwood DC, et al. Maternal alcohol intake prior to and during pregnancy and risk of adverse birth outcomes: evidence from a British cohort. *J Epidemiol Community Health* 2014;**68**(6):542-9 doi: <http://dx.doi.org/10.1136/jech-2013-202934>[published Online First: Epub Date]].
  22. Niclasen J, Nybo Andersen AM, Teasdale TW, Strandberg-Larsen K. Prenatal exposure to alcohol, and gender differences on child mental health at age seven years. *J Epidemiol Community Health* 2014;**68**(3):224-32 doi: <http://dx.doi.org/10.1136/jech-2013-202956>[published Online First: Epub Date]].
  23. Miyake Y, Tanaka K, Okubo H, Sasaki S, Arakawa M. Alcohol consumption during pregnancy and birth outcomes: the Kyushu Okinawa Maternal and Child Health Study. *BMC Pregnancy Childbirth* 2014;**14**:79 doi: <http://dx.doi.org/10.1186/1471-2393-14-79>[published Online First: Epub Date]].
  24. Robinson M, Oddy WH, McLean NJ, et al. Low-moderate prenatal alcohol exposure and risk to child behavioural development: a prospective cohort study. *Bjog* 2010;**117**(9):1139-50 doi: <http://dx.doi.org/10.1111/j.1471-0528.2010.02596.x>[published Online First: Epub Date]].
  25. Jaddoe VW, Bakker R, Hofman A, et al. Moderate alcohol consumption during pregnancy and the risk of low birth weight and preterm birth. The generation R study. *Ann Epidemiol* 2007;**17**(10):834-40
  26. Sayal K, Heron J, Golding J, Emond A. Prenatal alcohol exposure and gender differences in childhood mental health problems: a longitudinal population-based study. *Pediatrics* 2007;**119**(2):e426-34
  27. Albertsen K, Andersen AM, Olsen J, Gronbaek M. Alcohol consumption during pregnancy and the risk of preterm delivery. *Am J Epidemiol* 2004;**159**(2):155-61
  28. Lundsberg LS, Bracken MB, Saftlas AF. Low-to-moderate gestational alcohol use and intrauterine growth retardation, low birthweight, and preterm delivery. *Ann Epidemiol* 1997;**7**(7):498-508
  29. Passaro KT, Little RE, Savitz DA, Noss J. The effect of maternal drinking before conception and in early pregnancy on infant birthweight. The ALSPAC Study Team. *Avon Longitudinal Study of Pregnancy and Childhood. Epidemiology* 1996;**7**(4):377-83
  30. Shu XO, Hatch MC, Mills J, Clemens J, Susser M. Maternal smoking, alcohol drinking, caffeine consumption, and fetal growth: results from a prospective study. *Epidemiology* 1995;**6**(2):115-20
  31. Olsen J, Pereira AdC, Olsen SF. Does maternal tobacco smoking modify the effect of alcohol on fetal growth? *American journal of public health* 1991;**81**(1):69-73
  32. Brooke OG, Anderson HR, Bland JM, Peacock JL, Stewart CM. Effects on birth weight of smoking, alcohol, caffeine, socioeconomic factors, and psychosocial stress. *Bmj* 1989;**298**(6676):795-801
  33. Bille C, Olsen J, Vach W, et al. Oral clefts and life style factors--a case-cohort study based on prospective Danish data. *Eur J Epidemiol* 2007;**22**(3):173-81
  34. Ernhart CB, Sokol RJ, Ager JW, Morrow-Tlucak M, Martier S. Alcohol-related birth defects: assessing the risk. *Ann N Y Acad Sci* 1989;**562**:159-72
  35. Ogston SA, Parry GJ. EUROMAC. A European concerted action: maternal alcohol consumption and its relation to the outcome of pregnancy and child development at 18 months. Results--strategy of analysis and analysis of pregnancy outcome. *Int J Epidemiol* 1992;**21** Suppl 1:S45-71
  36. Andersen A-MN, Andersen PK, Olsen J, Grønbaek M, Strandberg-Larsen K. Moderate alcohol intake during pregnancy and risk of fetal death. *Int J Epidemiol* 2012;**41**(2):405-13
  37. Windham GC, Von Behren J, Fenster L, Schaefer C, Swan SH. Moderate maternal alcohol consumption and risk of spontaneous abortion. *Epidemiology* 1997;**8**(5):509-14

- 1  
2  
3 38. McCarthy FP, O'Keeffe LM, Khashan AS, et al. Association between maternal alcohol  
4 consumption in early pregnancy and pregnancy outcomes. *Obstetrics & Gynecology*  
5 2013;**122**(4):830-37
- 6 39. Faebo Larsen R, Hvas Mortensen L, Martinussen T, Nybo Andersen AM. Determinants of  
7 developmental coordination disorder in 7-year-old children: a study of children in the Danish  
8 National Birth Cohort. *Dev Med Child Neurol* 2013;**55**(11):1016-22 doi:  
9 <http://dx.doi.org/10.1111/dmcn.12223>[published Online First: Epub Date]].
- 10 40. Parry GJ, Ogston SA. EUROMAC. A European concerted action: maternal alcohol consumption  
11 and its relation to the outcome of pregnancy and child development at 18 months. Results--  
12 child development at age 18 months. *Int J Epidemiol* 1992;**21 Suppl 1**:S72-8
- 13 41. NHS Choices. Can I drink alcohol if I'm pregnant?  
14 [www.nhs.uk/chq/Pages/2270.aspx?CategoryID=54#close](http://www.nhs.uk/chq/Pages/2270.aspx?CategoryID=54#close). 2014
- 15 42. Kelly Y, Sacker A, Gray R, Kelly J, Wolke D, Quigley MA. Light drinking in pregnancy, a risk for  
16 behavioural problems and cognitive deficits at 3 years of age? *Int J Epidemiol*  
17 2009;**38**(1):129-40 doi: <http://dx.doi.org/10.1093/ije/dyn230>[published  
18 Online First: Epub  
19 Date]].
- 20 43. Bradley RH, Corwyn RF. Socioeconomic status and child development. *Annual review of*  
21 *psychology* 2002;**53**(1):371-99
- 22 44. Phung H, Bauman A, Nguyen T, Young L, Tran M, Hillman K. Risk factors for low birth weight in a  
23 socio-economically disadvantaged population: parity, marital status, ethnicity and cigarette  
24 smoking. *Eur J Epidemiol* 2003;**18**(3):235-43
- 25 45. Morrison A, Polisena J, Husereau D, et al. The effect of English-language restriction on systematic  
26 review-based meta-analyses: a systematic review of empirical studies. *International journal of*  
27 *technology assessment in health care* 2012;**28**(02):138-44
- 28 46. Moher D, Pham B, Lawson M, Klassen T. The inclusion of reports of randomised trials published  
29 in languages other than English in systematic reviews. *Health Technol Assess* 2003;**7**(41):1-  
30 90
- 31 47. Klassen TP, Lawson ML, Moher D. Language of publication restrictions in systematic reviews gave  
32 different results depending on whether the intervention was conventional or  
33 complementary. *Journal of clinical epidemiology* 2005;**58**(8):769-76. e2
- 34 48. Jüni P, Holenstein F, Sterne J, Bartlett C, Egger M. Direction and impact of language bias in meta-  
35 analyses of controlled trials: empirical study. *Int J Epidemiol* 2002;**31**(1):115-23
- 36 49. Richmond RC, Al-Amin A, Smith GD, Relton CL. Approaches for drawing causal inferences from  
37 epidemiological birth cohorts: a review. *Early human development* 2014;**90**(11):769-80 doi:  
38 10.1016/j.earlhumdev.2014.08.023[published Online First: Epub Date]].
- 39 50. Burgess S, Davies NM, Thompson SG. Instrumental variable analysis with a nonlinear exposure-  
40 outcome relationship. *Epidemiology* 2014;**25**(6):877-85 doi:  
41 10.1097/ede.000000000000161[published Online First: Epub Date]].
- 42 51. Ades A, Sutton A. Multiparameter evidence synthesis in epidemiology and medical decision-  
43 making: current approaches. *Journal of the Royal Statistical Society: Series A (Statistics in*  
44 *Society)* 2006;**169**(1):5-35
- 45 52. O'Keeffe LM, Kearney PM, McCarthy FP, et al. Prevalence and predictors of alcohol use during  
46 pregnancy: findings from international multicentre cohort studies. *BMJ open*  
47 2015;**5**(7):e006323
- 48 53. Mather M, Wiles K, O'Brien P. Should women abstain from alcohol throughout pregnancy? 2015  
49  
50  
51  
52  
53  
54  
55  
56  
57  
58  
59  
60

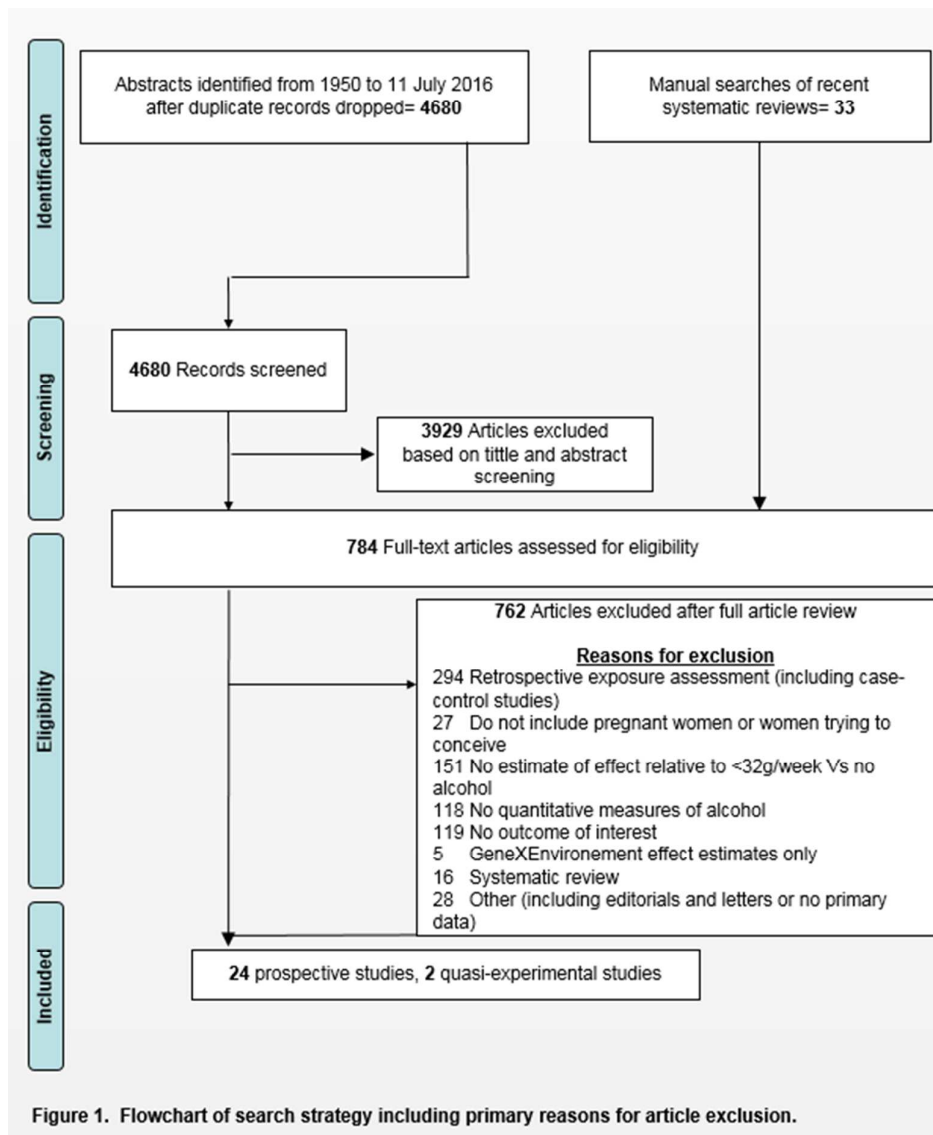

Review only

1  
2  
3  
4  
5  
6  
7  
8  
9  
10  
11  
12  
13  
14  
15  
16  
17  
18  
19  
20  
21  
22  
23  
24  
25  
26  
27  
28  
29  
30  
31  
32  
33  
34  
35  
36  
37  
38  
39  
40  
41  
42  
43  
44  
45  
46  
47  
48  
49

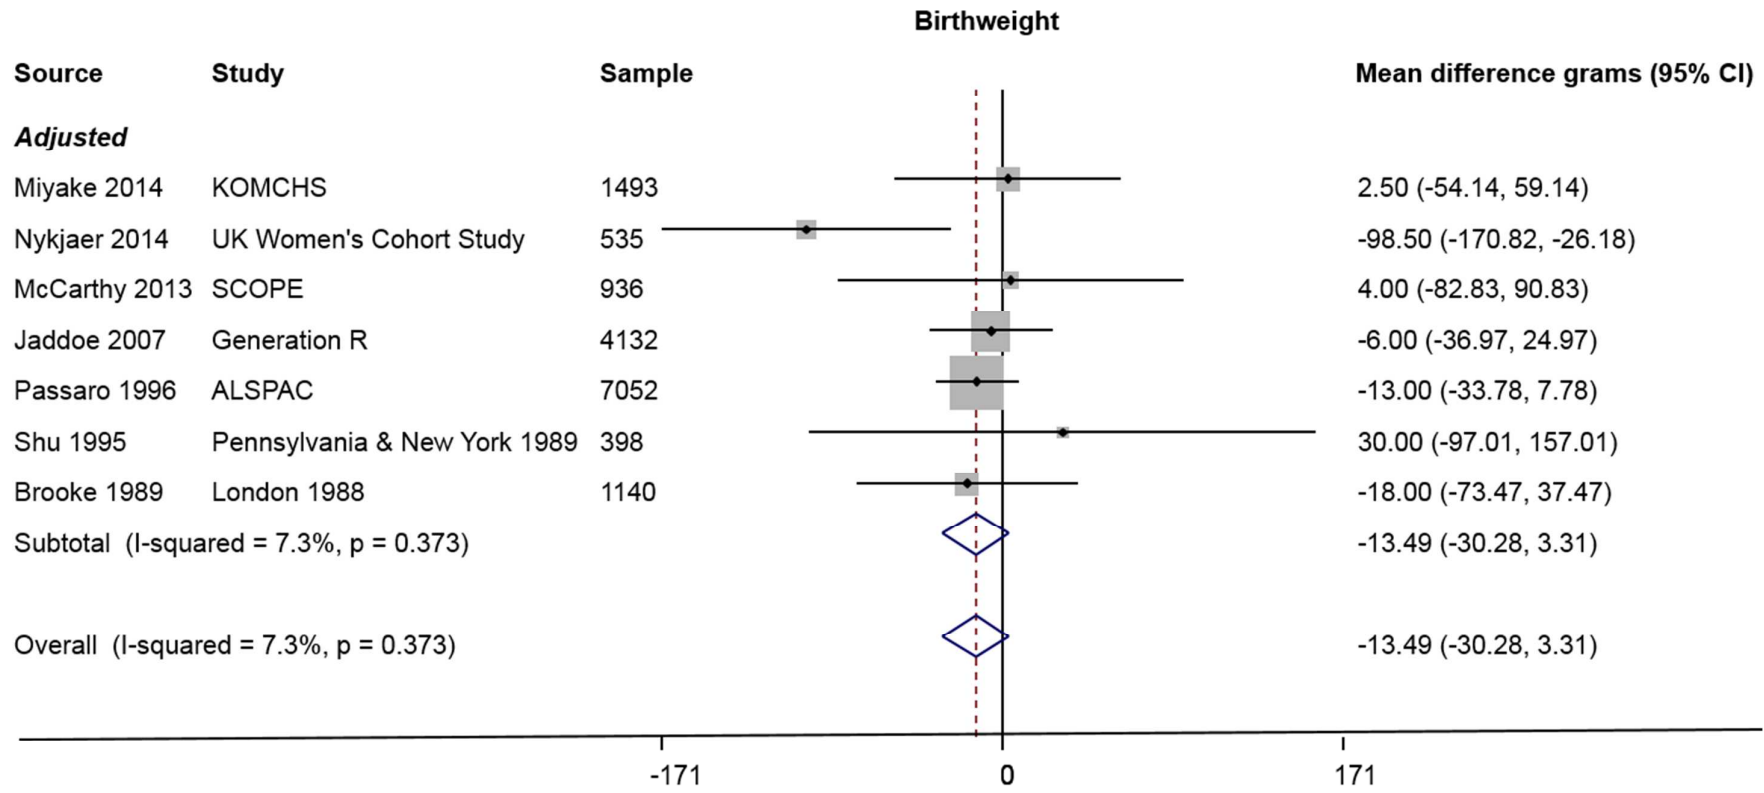

**Figure 2.** Pooled mean difference for birthweight comparing low alcohol consumption (up to 32g/week) with no alcohol consumption (7 studies). 'Adjusted' refers to adjusted for both smoking and a measure of socio-economic status. CI: Confidence intervals.

1  
2  
3  
4  
5  
6  
7  
8  
9  
10  
11  
12  
13  
14  
15  
16  
17  
18  
19  
20  
21  
22  
23  
24  
25  
26  
27  
28  
29  
30  
31  
32  
33  
34  
35  
36  
37  
38  
39  
40  
41  
42  
43  
44  
45  
46  
47  
48  
49

a)

b)

For peer review only

1  
2  
3  
4  
5  
6  
7  
8  
9  
10  
11  
12  
13  
14  
15  
16  
17  
18  
19  
20  
21  
22  
23  
24  
25  
26  
27  
28  
29  
30  
31  
32  
33  
34  
35  
36  
37  
38  
39  
40  
41  
42  
43  
44  
45  
46  
47  
48  
49

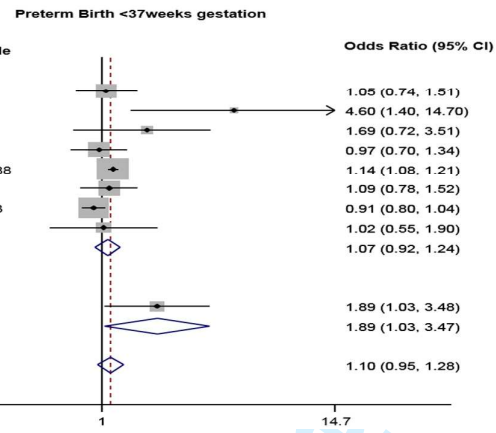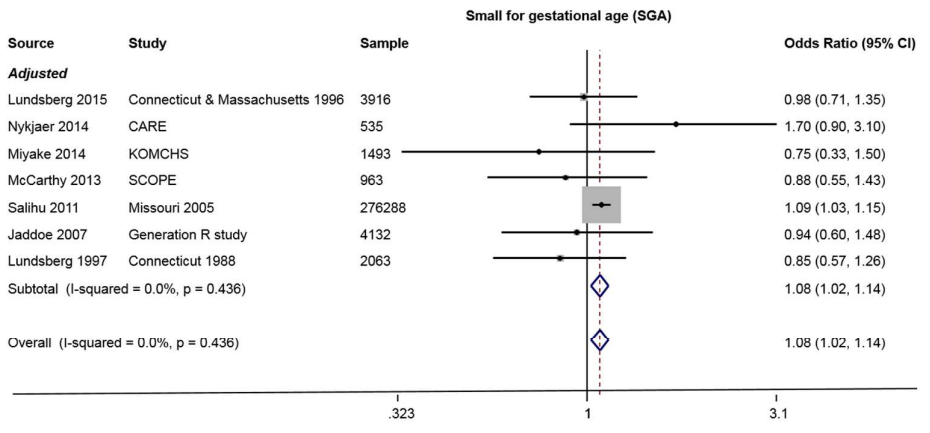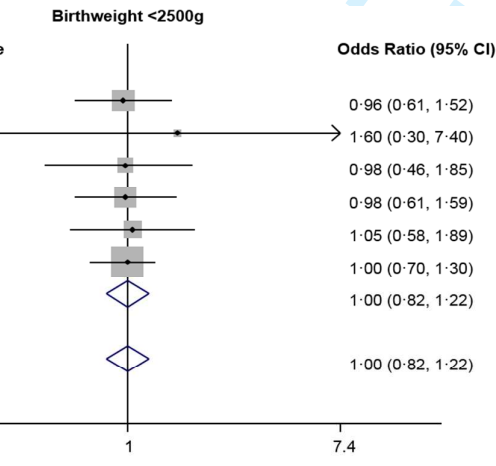

**Figure 3a)** Odd Ratios for preterm birth comparing low alcohol consumption (up to 32g/week) with no alcohol consumption (8 studies); **3b)** Odd Ratios for small for gestational age comparing low alcohol consumption (up to 32g/week) with no alcohol consumption (7 studies) **3c)** Odd Ratios for low birthweight comparing low alcohol consumption (up to 32g/week) with no alcohol consumption (6 studies). OR: Odds ratio, CI: Confidence intervals. Pooled OR includes both adjusted and unadjusted estimates from studies, 'Adjusted' refers to adjusted for both smoking and a measure of socio-economic status.

Supplementary material

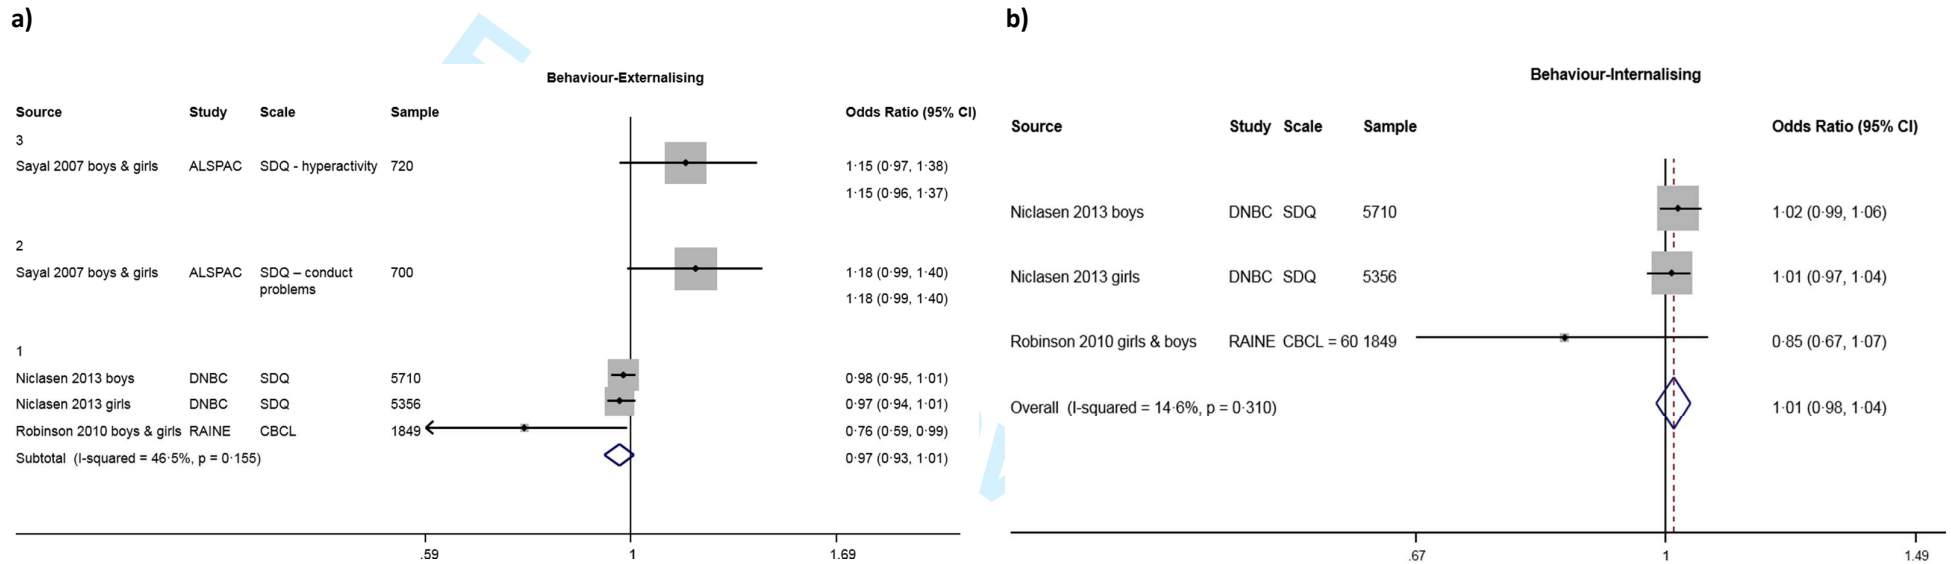

**Supplementary figure 1a)** Odds ratios for externalising behaviour comparing low alcohol consumption (up to 32g/week) with no alcohol consumption (3 studies); **1b)** Odds ratios for internalising behaviour comparing low alcohol consumption (up to 32g/week) with no alcohol consumption (2 studies); OR: Odds ratio, CI: Confidence intervals.

1  
2  
3  
4  
5  
6  
7  
8  
9  
10  
11  
12  
13  
14  
15  
16  
17  
18  
19  
20  
21  
22  
23  
24  
25  
26  
27  
28  
29  
30  
31  
32  
33  
34  
35  
36  
37  
38  
39  
40  
41  
42  
43  
44  
45  
46  
47  
48  
49

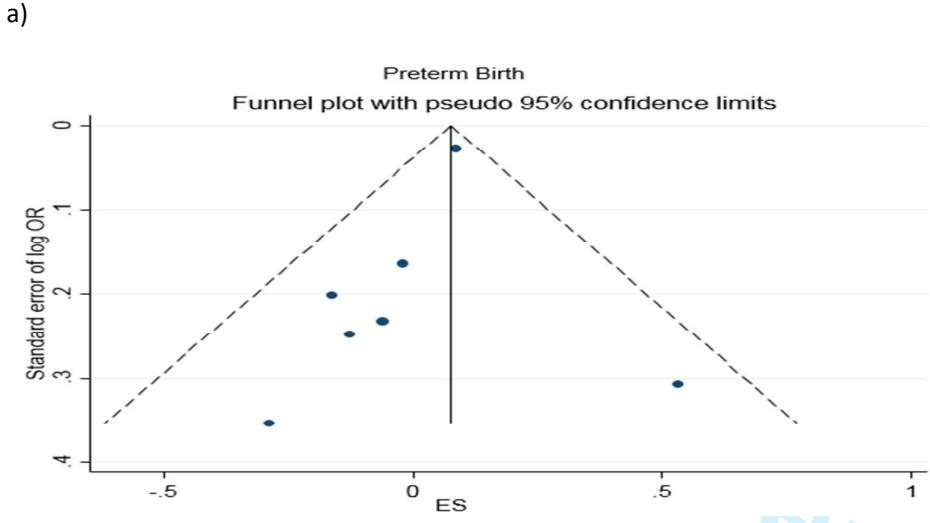

Supplementary figure 2a. Funnel plot of studies included in the meta-analysis for preterm birth.

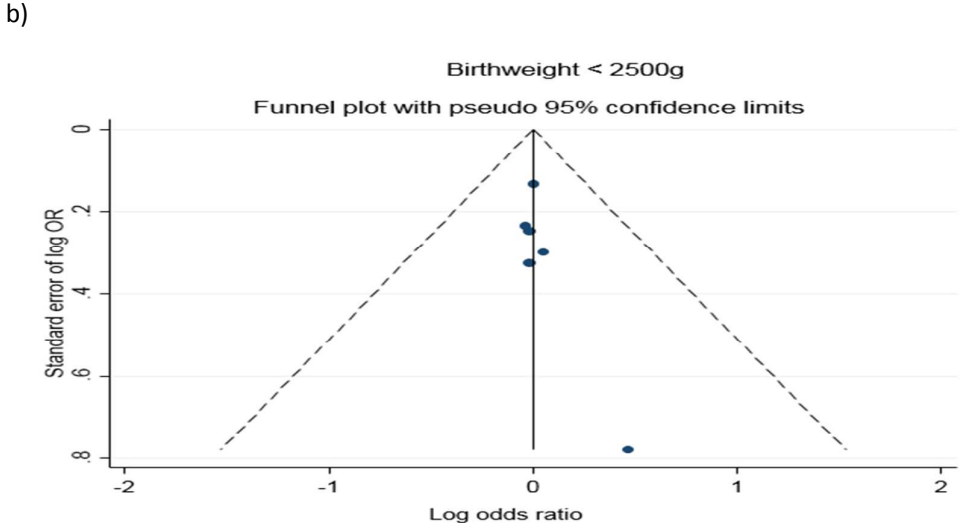

Supplementary figure 2b. Funnel plot of studies included in the meta-analysis for birthweight <2500g.

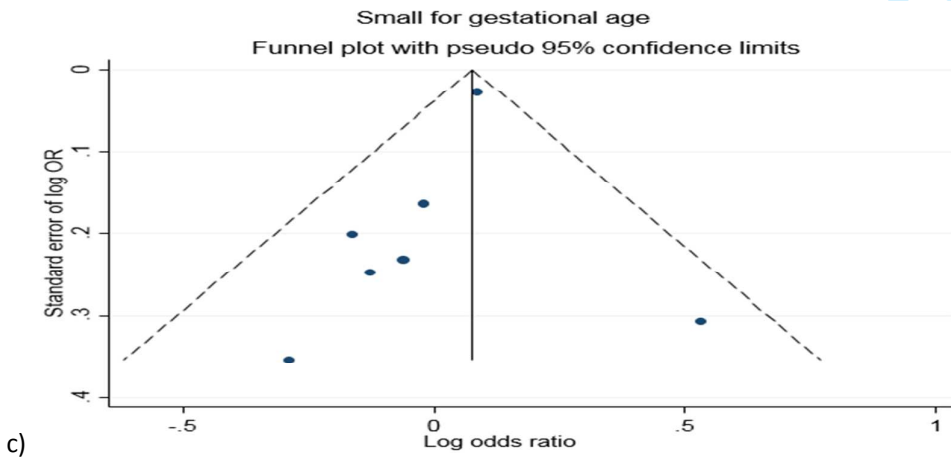

Supplementary figure 2c. Funnel plot of studies included in the meta-analysis for small for gestational age.

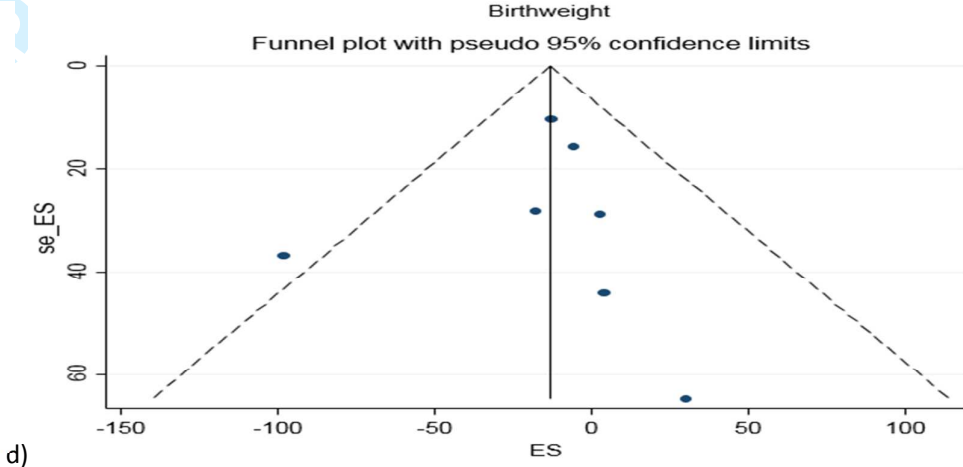

Supplementary figure 2d. Funnel plot of studies included in the meta-analysis for birthweight in grams.

Supplementary Table 1. Search Strategy 1950 to 11-07-2016. MEDLINE, PsycINFO, EMBASE on Ovid; the Cochrane Library including CENTRAL (the Cochrane Central Database of Controlled



1  
2  
3  
4  
5 Trials) on Wiley Interscience; and Science Citation Index, Social Science Citation Index, on Web of Science.  
6

- 7 1 exp pregnancy/ (719661)  
8 2 Pregnant Women/ (5199)  
9 3 preconception care/ or prenatal care/ (21644)  
10 4 exp "embryonic and fetal development"/ (212127)  
11 5 Fetus/ (68424)  
12 6 exp Pregnancy Complications/ (343999)  
13 7 (prepregnan\$ or conception or preconception or pregnan\$ or prenatal\$ or pre-natal\$ or  
14 f?etal or f?etus  
15 or in utero).ti,ab. (588557)  
16 8 Maternal exposure/ (5534)  
17 9 or/1-8 (1079283)  
18 10 Ethanol/ (73449)  
19 11 Alcohol dehydrogenase/ (5809)  
20 12 Aldehyde Oxidoreductases/ (3672)  
21 13 exp Drinking Behavior/ (57821)  
22 14 Temperance/ (2430)  
23 15 alcohol\$.ti. (106954)  
24 16 (alcohol dehydrogenase or acetaldehyde dehydrogenase).ti,ab. (8557)  
25 17 ((alcohol or alcoholic) adj3 (drink\$ or exposure or consumption or consume\$ or consuming  
26 or low or light or moderat\$ or abstin\$ or abstain\$)).ti,ab. (49470)  
27 18 ((low or light or moderate or abstin\$ or abstain\$ or pattern\$ or behavio?r\$) adj3 drink\$).ti,ab.  
28 (10558)  
29 19 (ADH1B\$ or teetotal\$ or temperance or nondrink\$ or non-drink\$).ti,ab. (3093)  
30 20 Genome-Wide Association Study/ or Linkage Disequilibrium/ or genotype/ or phenotype/ or  
31 polymorphism, genetic/ or (polymorphism\$ or ((gene or genes or genetic or genotyp\$) adj3  
32 (instrument\$ or variant\$ or variable\$ or variability or variabilities or variance\$))).ti,ab. (494904)  
33 21 \*Alcohols/ or exp \*Alcohol-Related Disorders/ or (alcohol adj3 (misuse or "use" or abuse or  
34 addict\$ or dependence or response\$ or susceptibility)).ti,ab. (110843)  
35 22 20 and 21 (3108)  
36 23 or/10-19,22 (213050)  
37  
38  
39  
40  
41  
42  
43  
44  
45  
46  
47  
48  
49

1  
2  
3  
4  
5  
6  
7  
8  
9  
10  
11  
12  
13  
14  
15  
16  
17  
18  
19  
20  
21  
22  
23  
24  
25  
26  
27  
28  
29  
30  
31  
32  
33  
34  
35  
36  
37  
38  
39  
40  
41  
42  
43  
44  
45  
46  
47  
48  
49

- 24 9 and 23 (11403)
- 25 letter/ (861500)
- 26 editorial/ (368458)
- 27 news/ (166329)
- 28 exp historical article/ (325965)
- 29 Anecdotes as topic/ (4586)
- 30 comment/ (610211)
- 31 case report/ (1708277)
- 32 (letter or comment\$.ti. (100442)
- 33 or/25-32 (3417468)
- 34 randomized controlled trial/ or Randomized Controlled Trials as Topic/ or random\$.ti,ab. (888907)
- 35 33 not 34 (3386180)
- 36 animals/ not humans/ (3889478)
- 37 exp Animals, Laboratory/ (730783)
- 38 exp Animal Experimentation/ (6477)
- 39 exp Models, Animal/ not humans/ (310115)
- 40 exp rodentia/ (2688128)
- 41 (rat or rats or mouse or mice).ti. (1123907)
- 42 or/35-41 (7849766)
- 43 24 not 42 (6498)
- 44 meta-analysis/ (52850)
- 45 meta-analysis as topic/ (13933)
- 46 (meta analy\$ or metaanaly\$ or metanaly\$ or meta regression).ti,ab. (72390)
- 47 ((systematic\$ or evidence\$ or realist or narrative or literature) adj2 (review\$ or overview\$)).ti,ab.  
(171877)
- 48 "review of reviews".ti,ab. (211)
- 49 (reference list\$ or bibliograph\$ or hand search\$ or manual search\$ or relevant journals).ab.  
(27094)
- 50 (search strategy or search criteria or systematic search or study selection or data extraction).ab.  
(28877)
- 51 (search\$ adj4 literature).ab. (30686)

For peer review only

1  
2  
3  
4  
5 52 (medline or pubmed or cochrane or embase or psychlit or psyclit or psychinfo or cinahl or science  
6 Citation index or bids or cancerlit).ab. (95294)  
7 53 cochrane.jw. (11053)  
8 54 ((multiple treatment\$ or indirect or mixed) adj2 comparison).ti,ab. (991)  
9 55 or/44-54 (293491)  
10 56 43 and 55 (201)  
11 57 epidemiologic studies/ (6077)  
12 58 ep.fs. (1223653)  
13 59 exp case control studies/ (691899)  
14 60 exp cohort studies/ (1394149)  
15 61 cross-sectional studies/ (185407)  
16 62 Mendelian Randomization Analysis/ (229)  
17 63 (case control or negative control).ti,ab. (93097)  
18 64 (cohort adj (study or studies or analys\$)).ti,ab. (98537)  
19 65 ((follow up or observational) adj (study or studies)).ti,ab. (87771)  
20 66 ((longitudinal\$ or retrospectiv\$ or prospectiv\$) and (study or studies or studied or review\$ or  
21 analys\$ or cohort\$)).ti,ab. (870699)  
22 67 cross sectional.ti,ab. (183479)  
23 68 (mendel\$ or natural experiment\$).ti,ab. (11082)  
24 69 ((family or sibling or population) adj3 (study or studies)).ti,ab. (115245)  
25 70 or/57-69 (2937160)  
26 71 exp guideline/ (25834)  
27 72 guidelines as topic/ or practice guidelines as topic/ (114690)  
28 73 guideline\$.mp. (291621)  
29 74 or/71-73 (291621)  
30 75 55 or 70 or 74 (3362878)  
31 76 43 and 75 (3349)  
32 77 limit 76 to english language (3096)  
33 78 ((smok\$ or drug\$ or tobacco or nicotine or cigarette\$ or substance\$ or methamphetamine\$  
34 or amphetamine\$ or cocaine\$ or heroin or cannabis or marijuana) not (alcohol or alcoholic or drink\$)).ti.  
35 (489662)  
36  
37  
38  
39  
40  
41  
42  
43  
44  
45  
46  
47  
48  
49

1  
2  
3  
4  
5  
6  
7  
8  
9  
10  
11  
12  
13  
14  
15  
16  
17  
18  
19  
20  
21  
22  
23  
24  
25  
26  
27  
28  
29  
30  
31  
32  
33  
34  
35  
36  
37  
38  
39  
40  
41  
42  
43  
44  
45  
46  
47  
48  
49

79 77 not 78 (2822)

---

For peer review only

**Supplementary Table 2.** Lists of confounders adjusted for by each study

| Study (year)             | Confounders                                                                                                                                                                                                                                                                                                                                                                                                                                                                                                                                                                                                                                                        |
|--------------------------|--------------------------------------------------------------------------------------------------------------------------------------------------------------------------------------------------------------------------------------------------------------------------------------------------------------------------------------------------------------------------------------------------------------------------------------------------------------------------------------------------------------------------------------------------------------------------------------------------------------------------------------------------------------------|
| [20] Lundsberg (2015)    | Parity, maternal age, education, BMI, marital status, ethnicity, caffeine, smoking, exercise, work, prenatal and multivitamin use, passive smoke exposure, marijuana use, cocaine use, study cohort, preterm labour, respiratory problem, infant gender, bleeding, nausea/vomiting, hypertension, incompetent cervix, placental problems, sexually transmitted disease, induction/augmentation, maternal asthma, gestational diabetes.                                                                                                                                                                                                                             |
| [21] Nykjaer (2014)      | Maternal pre-pregnancy weight, height, age, parity, ethnicity, salivary cotinine levels, caffeine intake, education, energy intake, gestation and baby's sex                                                                                                                                                                                                                                                                                                                                                                                                                                                                                                       |
| [22] Niclasen (2014)     | Adjusted for the following confounders: parental smoking, parental education, parental pre-pregnancy psychiatric diagnoses, and maternal psychological well-being in pregnancy.                                                                                                                                                                                                                                                                                                                                                                                                                                                                                    |
| [23] Miyake (2014)       | Low birth weight, preterm birth: maternal age; region of residence; number of children; family structure; maternal education; maternal employment; body mass index; maternal smoking during pregnancy; and baby's gender.<br>Small for gestational age: maternal age; region of residence; number of children; family structure; maternal education; maternal employment; body mass index; maternal smoking during pregnancy; gestational age; and baby's gender.                                                                                                                                                                                                  |
| [39] Faeco Larsen (2013) | Sex, gestational age, intrauterine growth restriction, maternal age, mother's occupational status, maternal smoking (ever) in first trimester, amount of maternal smoking and alcohol consumption in first trimester.                                                                                                                                                                                                                                                                                                                                                                                                                                              |
| [15] Sayal (2013)        | Maternal age, parity, highest level of maternal education, daily frequency of smoking, use of cannabis and/or other illicit drugs during the first trimester, homeownership, whether currently married, high scores (>12) on the Edinburgh Postnatal Depression Scale, and child gestational age, birth weight and gender.                                                                                                                                                                                                                                                                                                                                         |
| [38] McCarthy (2013)     | Maternal age, smoking, years of schooling, ethnicity, body mass index, infant sex, maternal status, family income, and drug use during pregnancy. Adjusted for clustering. Birthweight adjusted for gestational age at delivery.                                                                                                                                                                                                                                                                                                                                                                                                                                   |
| [36] Andersen (2012)     | Number of previous abortions, coffee consumption, changes in alcohol consumption since prior to pregnancy and smoking. Effect of coffee consumption and smoking was stratified according to period. The model is stratified according to maternal age and parity.                                                                                                                                                                                                                                                                                                                                                                                                  |
| [14] Salihi (2011)       | Maternal age, parity, race, smoking, education, marital status, adequacy of prenatal care, maternal height, gender of the infant, and year of birth                                                                                                                                                                                                                                                                                                                                                                                                                                                                                                                |
| [24] Robinson (2010)     | Maternal age, maternal education, presence of the biological father in the family home, family income, stress in pregnancy, child's age at follow up (and child's age at follow-up squared), and maternal cigarette smoking.                                                                                                                                                                                                                                                                                                                                                                                                                                       |
| [25] Jaddoe (2007)       | Controlled for maternal body mass index, smoking, educational level, height, ethnicity, parity and age and infant gender; birth weight and low birth weight models also controlled for gestational age.                                                                                                                                                                                                                                                                                                                                                                                                                                                            |
| [33] Bille (2007)        | Parental age and social class                                                                                                                                                                                                                                                                                                                                                                                                                                                                                                                                                                                                                                      |
| [26] Sayal (2007)        | Gender, smoking, cannabis use and use of illicit drugs in the first trimester; highest level of maternal education; home ownership; marital status; parity; maternal age group; high EPDS score; child ethnicity; gestational age group; and birth weight                                                                                                                                                                                                                                                                                                                                                                                                          |
| [27] Albertsen (2004)    | Type 1 diabetes, age, previous preterm delivery, smoking during pregnancy, coffee consumption during pregnancy, occupational status in the household, parity, and total alcohol consumption during pregnancy.                                                                                                                                                                                                                                                                                                                                                                                                                                                      |
| [28] Lundsberg (1997)    | Small for gestational age: smoking in month 7, ethnicity, weight, height, infant sex, parity, bleeding during pregnancy, high blood pressure, and preeclampsia/eclampsia. Low birthweight: smoking in month 7, height, weight, ethnicity, infant sex, parity, coffee use in month 7, exercise in third trimester, employment, bleeding during pregnancy, high blood pressure, pre-eclampsia/eclampsia, anomalies, and placental problems. Preterm delivery: smoking in month 7, height, parity, age, caffeine use in month 7, exercise first 16 weeks, bleeding during pregnancy, high blood pressure, pre-eclampsia/eclampsia, anomalies, and placental problems. |
| [37] Windham (1997)      | Maternal age, prior spontaneous abortion, gestational age at interview, and cigarette and caffeine consumption in week before interview.                                                                                                                                                                                                                                                                                                                                                                                                                                                                                                                           |
| [29] Passaro (1996)      | Gestational age, infant sex, parity, maternal smoking, and maternal body mass index.                                                                                                                                                                                                                                                                                                                                                                                                                                                                                                                                                                               |
| [30] Shu (1995)          | Gestational age, parity, smoking and income.                                                                                                                                                                                                                                                                                                                                                                                                                                                                                                                                                                                                                       |
| [16] Peacock (1995)      | Unadjusted                                                                                                                                                                                                                                                                                                                                                                                                                                                                                                                                                                                                                                                         |
| [31] Olsen (1991)        | Age, school education and parity, alcohol and smoking entered the model as "dummy variables".                                                                                                                                                                                                                                                                                                                                                                                                                                                                                                                                                                      |
| [35] Ogston (1992)       | Gestational age at birth, sex, mother's age, parity and smoking.                                                                                                                                                                                                                                                                                                                                                                                                                                                                                                                                                                                                   |
| [40] Parry (1992)        | Gestational age at birth, sex, mother's age, parity and smoking.                                                                                                                                                                                                                                                                                                                                                                                                                                                                                                                                                                                                   |
| [32] Brooke (1989)       | Gestational age, sex, maternal height, and parity                                                                                                                                                                                                                                                                                                                                                                                                                                                                                                                                                                                                                  |

1  
2  
3  
4  
5  
6  
7  
8  
9  
10  
11  
12  
13  
14  
15  
16  
17  
18  
19  
20  
21  
22  
23  
24  
25  
26  
27  
28  
29  
30  
31  
32  
33  
34  
35  
36  
37  
38  
39  
40  
41  
42  
43  
44  
45  
46  
47  
48  
49

|                     |                                          |
|---------------------|------------------------------------------|
| [34] Ernhart (1989) | Parity, smoking, race and year of study. |
|---------------------|------------------------------------------|

For peer review only

## PRISMA 2009 Checklist

| Section/topic             | # | Checklist item                                                                                                                                                                                                                                                                                              | Reported on page # |
|---------------------------|---|-------------------------------------------------------------------------------------------------------------------------------------------------------------------------------------------------------------------------------------------------------------------------------------------------------------|--------------------|
| <b>TITLE</b>              |   |                                                                                                                                                                                                                                                                                                             |                    |
| Title                     | 1 | Identify the report as a systematic review, meta-analysis, or both.                                                                                                                                                                                                                                         | 1                  |
| <b>ABSTRACT</b>           |   |                                                                                                                                                                                                                                                                                                             |                    |
| Structured summary        | 2 | Provide a structured summary including, as applicable: background; objectives; data sources; study eligibility criteria, participants, and interventions; study appraisal and synthesis methods; results; limitations; conclusions and implications of key findings; systematic review registration number. | 4                  |
| <b>INTRODUCTION</b>       |   |                                                                                                                                                                                                                                                                                                             |                    |
| Rationale                 | 3 | Describe the rationale for the review in the context of what is already known.                                                                                                                                                                                                                              | 5                  |
| Objectives                | 4 | Provide an explicit statement of questions being addressed with reference to participants, interventions, comparisons, outcomes, and study design (PICOS).                                                                                                                                                  | 5                  |
| <b>METHODS</b>            |   |                                                                                                                                                                                                                                                                                                             |                    |
| Protocol and registration | 5 | Indicate if a review protocol exists, if and where it can be accessed (e.g., Web address), and, if available, provide registration information including registration number.                                                                                                                               | 6                  |
| Eligibility criteria      | 6 | Specify study characteristics (e.g., PICOS, length of follow-up) and report characteristics (e.g., years considered, language, publication status) used as criteria for eligibility, giving rationale.                                                                                                      | 6 & 7              |
| Information sources       | 7 | Describe all information sources (e.g., databases with dates of coverage, contact with study authors to identify additional studies) in the search and date last searched.                                                                                                                                  | 7                  |
| Search                    | 8 | Present full electronic search strategy for at least one database, including any limits used, such that it could be repeated.                                                                                                                                                                               | 33-39              |
| Study selection           | 9 | State the process for selecting studies (i.e., screening, eligibility, included in systematic review, and, if applicable, included in the meta-analysis).                                                                                                                                                   | 7                  |

|                                    |    |                                                                                                                                                                                                                        |         |
|------------------------------------|----|------------------------------------------------------------------------------------------------------------------------------------------------------------------------------------------------------------------------|---------|
| Data collection process            | 10 | Describe method of data extraction from reports (e.g., piloted forms, independently, in duplicate) and any processes for obtaining and confirming data from investigators.                                             | 8       |
| Data items                         | 11 | List and define all variables for which data were sought (e.g., PICOS, funding sources) and any assumptions and simplifications made.                                                                                  | 7 & 8   |
| Risk of bias in individual studies | 12 | Describe methods used for assessing risk of bias of individual studies (including specification of whether this was done at the study or outcome level), and how this information is to be used in any data synthesis. | 6 & 7   |
| Summary measures                   | 13 | State the principal summary measures (e.g., risk ratio, difference in means).                                                                                                                                          | 9       |
| Synthesis of results               | 14 | Describe the methods of handling data and combining results of studies, if done, including measures of consistency (e.g., $I^2$ ) for each meta-analysis.                                                              | 8 & 9   |
| Risk of bias across studies        | 15 | Specify any assessment of risk of bias that may affect the cumulative evidence (e.g., publication bias, selective reporting within studies).                                                                           | 9       |
| Additional analyses                | 16 | Describe methods of additional analyses (e.g., sensitivity or subgroup analyses, meta-regression), if done, indicating which were pre-specified.                                                                       | 9       |
| <b>RESULTS</b>                     |    |                                                                                                                                                                                                                        |         |
| Study selection                    | 17 | Give numbers of studies screened, assessed for eligibility, and included in the review, with reasons for exclusions at each stage, ideally with a flow diagram.                                                        | 28      |
| Study characteristics              | 18 | For each study, present characteristics for which data were extracted (e.g., study size, PICOS, follow-up period) and provide the citations.                                                                           | 21-27   |
| Risk of bias within studies        | 19 | Present data on risk of bias of each study and, if available, any outcome level assessment (see item 12).                                                                                                              | 11      |
| Results of individual studies      | 20 | For all outcomes considered (benefits or harms), present, for each study: (a) simple summary data for each intervention group (b) effect estimates and confidence intervals, ideally with a forest plot.               | 29 & 30 |
| Synthesis of results               | 21 | Present results of each meta-analysis done, including confidence intervals and measures of consistency.                                                                                                                | 29 & 30 |
| Risk of bias across studies        | 22 | Present results of any assessment of risk of bias across studies (see Item 15).                                                                                                                                        | 32      |
| Additional analysis                | 23 | Give results of additional analyses, if done (e.g., sensitivity or subgroup analyses, meta-regression [see Item 16]).                                                                                                  | 29 & 30 |
| <b>DISCUSSION</b>                  |    |                                                                                                                                                                                                                        |         |
| Summary of evidence                | 24 | Summarize the main findings including the strength of evidence for each main outcome; consider their relevance to key groups (e.g., healthcare providers, users, and policy makers).                                   | 12      |



|                |    |                                                                                                                                                               |         |
|----------------|----|---------------------------------------------------------------------------------------------------------------------------------------------------------------|---------|
| Limitations    | 25 | Discuss limitations at study and outcome level (e.g., risk of bias), and at review-level (e.g., incomplete retrieval of identified research, reporting bias). | 12 & 13 |
| Conclusions    | 26 | Provide a general interpretation of the results in the context of other evidence, and implications for future research.                                       | 14      |
| <b>FUNDING</b> |    |                                                                                                                                                               |         |
| Funding        | 27 | Describe sources of funding for the systematic review and other support (e.g., supply of data); role of funders for the systematic review.                    | 16      |

### MOOSE Checklist for Meta-analyses of Observational Studies

| Item No                                     | Recommendation                                                                          | Reported on Page No   |
|---------------------------------------------|-----------------------------------------------------------------------------------------|-----------------------|
| Reporting of background should include      |                                                                                         |                       |
| 1                                           | Problem definition                                                                      | 1                     |
| 2                                           | Hypothesis statement                                                                    | NA                    |
| 3                                           | Description of study outcome(s)                                                         | 6&7                   |
| 4                                           | Type of exposure or intervention used                                                   | 6                     |
| 5                                           | Type of study designs used                                                              | 6                     |
| 6                                           | Study population                                                                        | 7                     |
| Reporting of search strategy should include |                                                                                         |                       |
| 7                                           | Qualifications of searchers (eg, librarians and investigators)                          | 7                     |
| 8                                           | Search strategy, including time period included in the synthesis and key words          | supplementary table 1 |
| 9                                           | Effort to include all available studies, including contact with authors                 | 7                     |
| 10                                          | Databases and registries searched                                                       | 7                     |
| 11                                          | Search software used, name and version, including special features used (eg, explosion) | supplementary table 1 |
| 12                                          | Use of hand searching (eg, reference lists of obtained articles)                        | 7                     |
| 13                                          | List of citations located and those excluded, including justification                   | Figure 1              |
| 14                                          | Method of addressing articles published in languages other than English                 | NA                    |
| 15                                          | Method of handling abstracts and unpublished studies                                    | supplementary table 1 |
| 16                                          | Description of any contact with authors                                                 | NA                    |
| Reporting of methods should include         |                                                                                         |                       |
| 17                                          | Description of relevance or appropriateness of studies assembled for assessing the      | 6                     |

|                                     |                                                                                                                                                                                                                                                                              |                           |
|-------------------------------------|------------------------------------------------------------------------------------------------------------------------------------------------------------------------------------------------------------------------------------------------------------------------------|---------------------------|
|                                     | hypothesis to be tested                                                                                                                                                                                                                                                      |                           |
| 18                                  | Rationale for the selection and coding of data (eg, sound clinical principles or convenience)                                                                                                                                                                                | 7                         |
| 19                                  | Documentation of how data were classified and coded (eg, multiple raters, blinding and interrater reliability)                                                                                                                                                               | NA                        |
| 20                                  | Assessment of confounding (eg, comparability of cases and controls in studies where appropriate)                                                                                                                                                                             | supplementary table 2 & 8 |
| 21                                  | Assessment of study quality, including blinding of quality assessors, stratification or regression on possible predictors of study results                                                                                                                                   | 8                         |
| 22                                  | Assessment of heterogeneity                                                                                                                                                                                                                                                  | Figures 2&3               |
| 23                                  | Description of statistical methods (eg, complete description of fixed or random effects models, justification of whether the chosen models account for predictors of study results, dose-response models, or cumulative meta-analysis) in sufficient detail to be replicated | 9&10                      |
| 24                                  | Provision of appropriate tables and graphics                                                                                                                                                                                                                                 | 27-36                     |
| Reporting of results should include |                                                                                                                                                                                                                                                                              |                           |
| 25                                  | Graphic summarizing individual study estimates and overall estimate                                                                                                                                                                                                          | Figures 2&3               |
| 26                                  | Table giving descriptive information for each study included                                                                                                                                                                                                                 | Table 1-3                 |
| 27                                  | Results of sensitivity testing (eg, subgroup analysis)                                                                                                                                                                                                                       | Figures 2&3               |
| 28                                  | Indication of statistical uncertainty of findings                                                                                                                                                                                                                            | 19                        |

1  
2  
3  
4  
5  
6  
7  
8  
9  
10  
11  
12  
13  
14  
15  
16  
17  
18  
19  
20  
21  
22  
23  
24  
25  
26  
27  
28  
29  
30  
31  
32  
33  
34  
35  
36  
37  
38  
39  
40  
41  
42  
43  
44  
45  
46  
47  
48  
49

**PRISMA 2009 Checklist**

| Section/topic             | #  | Checklist item                                                                                                                                                                                                                                                                                              | Reported on page # |
|---------------------------|----|-------------------------------------------------------------------------------------------------------------------------------------------------------------------------------------------------------------------------------------------------------------------------------------------------------------|--------------------|
| <b>TITLE</b>              |    |                                                                                                                                                                                                                                                                                                             |                    |
| Title                     | 1  | Identify the report as a systematic review, meta-analysis, or both.                                                                                                                                                                                                                                         | 1                  |
| <b>ABSTRACT</b>           |    |                                                                                                                                                                                                                                                                                                             |                    |
| Structured summary        | 2  | Provide a structured summary including, as applicable: background; objectives; data sources; study eligibility criteria, participants, and interventions; study appraisal and synthesis methods; results; limitations; conclusions and implications of key findings; systematic review registration number. | 3                  |
| <b>INTRODUCTION</b>       |    |                                                                                                                                                                                                                                                                                                             |                    |
| Rationale                 | 3  | Describe the rationale for the review in the context of what is already known.                                                                                                                                                                                                                              | 4                  |
| Objectives                | 4  | Provide an explicit statement of questions being addressed with reference to participants, interventions, comparisons, outcomes, and study design (PICOS).                                                                                                                                                  | 5&6                |
| <b>METHODS</b>            |    |                                                                                                                                                                                                                                                                                                             |                    |
| Protocol and registration | 5  | Indicate if a review protocol exists, if and where it can be accessed (e.g., Web address), and, if available, provide registration information including registration number.                                                                                                                               | 5                  |
| Eligibility criteria      | 6  | Specify study characteristics (e.g., PICOS, length of follow-up) and report characteristics (e.g., years considered, language, publication status) used as criteria for eligibility, giving rationale.                                                                                                      | 5 & 6              |
| Information sources       | 7  | Describe all information sources (e.g., databases with dates of coverage, contact with study authors to identify additional studies) in the search and date last searched.                                                                                                                                  | 6                  |
| Search                    | 8  | Present full electronic search strategy for at least one database, including any limits used, such that it could be repeated.                                                                                                                                                                               | supTable 1         |
| Study selection           | 9  | State the process for selecting studies (i.e., screening, eligibility, included in systematic review, and, if applicable, included in the meta-analysis).                                                                                                                                                   | Figure 1           |
| Data collection process   | 10 | Describe method of data extraction from reports (e.g., piloted forms, independently, in duplicate) and any processes for obtaining and confirming data from investigators.                                                                                                                                  | 6                  |

|                                    |    |                                                                                                                                                                                                                        |                          |
|------------------------------------|----|------------------------------------------------------------------------------------------------------------------------------------------------------------------------------------------------------------------------|--------------------------|
| Data items                         | 11 | List and define all variables for which data were sought (e.g., PICOS, funding sources) and any assumptions and simplifications made.                                                                                  | 7 & 8                    |
| Risk of bias in individual studies | 12 | Describe methods used for assessing risk of bias of individual studies (including specification of whether this was done at the study or outcome level), and how this information is to be used in any data synthesis. | 6 & 7                    |
| Summary measures                   | 13 | State the principal summary measures (e.g., risk ratio, difference in means).                                                                                                                                          | Figure 2&3<br>supfigure1 |
| Synthesis of results               | 14 | Describe the methods of handling data and combining results of studies, if done, including measures of consistency (e.g., $I^2$ ) for each meta-analysis.                                                              | Figure 2&3<br>supfigure1 |
| Risk of bias across studies        | 15 | Specify any assessment of risk of bias that may affect the cumulative evidence (e.g., publication bias, selective reporting within studies).                                                                           | 7                        |
| Additional analyses                | 16 | Describe methods of additional analyses (e.g., sensitivity or subgroup analyses, meta-regression), if done, indicating which were pre-specified.                                                                       | 8                        |
| <b>RESULTS</b>                     |    |                                                                                                                                                                                                                        |                          |
| Study selection                    | 17 | Give numbers of studies screened, assessed for eligibility, and included in the review, with reasons for exclusions at each stage, ideally with a flow diagram.                                                        | Figure 1                 |
| Study characteristics              | 18 | For each study, present characteristics for which data were extracted (e.g., study size, PICOS, follow-up period) and provide the citations.                                                                           | Table 1-3                |
| Risk of bias within studies        | 19 | Present data on risk of bias of each study and, if available, any outcome level assessment (see item 12).                                                                                                              | 7                        |
| Results of individual studies      | 20 | For all outcomes considered (benefits or harms), present, for each study: (a) simple summary data for each intervention group (b) effect estimates and confidence intervals, ideally with a forest plot.               | Figure 2&3<br>supfigure1 |
| Synthesis of results               | 21 | Present results of each meta-analysis done, including confidence intervals and measures of consistency.                                                                                                                | Figure 2&3<br>supfigure1 |
| Risk of bias across studies        | 22 | Present results of any assessment of risk of bias across studies (see Item 15).                                                                                                                                        | 13-14                    |
| Additional analysis                | 23 | Give results of additional analyses, if done (e.g., sensitivity or subgroup analyses, meta-regression [see Item 16]).                                                                                                  | Figure 2&3               |

1  
2  
3  
4  
5  
6  
7  
8  
9  
10  
11  
12  
13  
14  
15  
16  
17  
18  
19  
20  
21  
22  
23  
24  
25  
26  
27  
28  
29  
30  
31  
32  
33  
34  
35  
36  
37  
38  
39  
40  
41  
42  
43  
44  
45  
46  
47  
48  
49

|                     |    |                                                                                                                                                                                      |            |
|---------------------|----|--------------------------------------------------------------------------------------------------------------------------------------------------------------------------------------|------------|
|                     |    |                                                                                                                                                                                      | supfigure1 |
| <b>DISCUSSION</b>   |    |                                                                                                                                                                                      |            |
| Summary of evidence | 24 | Summarize the main findings including the strength of evidence for each main outcome; consider their relevance to key groups (e.g., healthcare providers, users, and policy makers). | 13&14      |
| Limitations         | 25 | Discuss limitations at study and outcome level (e.g., risk of bias), and at review-level (e.g., incomplete retrieval of identified research, reporting bias).                        | 13 & 14    |
| Conclusions         | 26 | Provide a general interpretation of the results in the context of other evidence, and implications for future research.                                                              | 13         |
| <b>FUNDING</b>      |    |                                                                                                                                                                                      |            |
| Funding             | 27 | Describe sources of funding for the systematic review and other support (e.g., supply of data); role of funders for the systematic review.                                           | 17         |

### MOOSE Checklist for Meta-analyses of Observational Studies

| Item No                                     | Recommendation                                                                                             | Reported on Page No   |
|---------------------------------------------|------------------------------------------------------------------------------------------------------------|-----------------------|
| Reporting of background should include      |                                                                                                            |                       |
| 1                                           | Problem definition                                                                                         | 1                     |
| 2                                           | Hypothesis statement                                                                                       | 4                     |
| 3                                           | Description of study outcome(s)                                                                            | 6&7                   |
| 4                                           | Type of exposure or intervention used                                                                      | 6                     |
| 5                                           | Type of study designs used                                                                                 | 6                     |
| 6                                           | Study population                                                                                           | 7                     |
| Reporting of search strategy should include |                                                                                                            |                       |
| 7                                           | Qualifications of searchers (eg, librarians and investigators)                                             | 7                     |
| 8                                           | Search strategy, including time period included in the synthesis and key words                             | supplementary table 1 |
| 9                                           | Effort to include all available studies, including contact with authors                                    | 7                     |
| 10                                          | Databases and registries searched                                                                          | 7                     |
| 11                                          | Search software used, name and version, including special features used (eg, explosion)                    | supplementary table 1 |
| 12                                          | Use of hand searching (eg, reference lists of obtained articles)                                           | 7                     |
| 13                                          | List of citations located and those excluded, including justification                                      | Figure 1              |
| 14                                          | Method of addressing articles published in languages other than English                                    | 13                    |
| 15                                          | Method of handling abstracts and unpublished studies                                                       | 6                     |
| 16                                          | Description of any contact with authors                                                                    | 6                     |
| Reporting of methods should include         |                                                                                                            |                       |
| 17                                          | Description of relevance or appropriateness of studies assembled for assessing the hypothesis to be tested | 6                     |

|                                     |                                                                                                                                                                                                                                                                              |                           |
|-------------------------------------|------------------------------------------------------------------------------------------------------------------------------------------------------------------------------------------------------------------------------------------------------------------------------|---------------------------|
| 18                                  | Rationale for the selection and coding of data (eg, sound clinical principles or convenience)                                                                                                                                                                                | 7                         |
| 19                                  | Documentation of how data were classified and coded (eg, multiple raters, blinding and interrater reliability)                                                                                                                                                               | 7&8                       |
| 20                                  | Assessment of confounding (eg, comparability of cases and controls in studies where appropriate)                                                                                                                                                                             | supplementary table 2 & 8 |
| 21                                  | Assessment of study quality, including blinding of quality assessors, stratification or regression on possible predictors of study results                                                                                                                                   | 8                         |
| 22                                  | Assessment of heterogeneity                                                                                                                                                                                                                                                  | Figures 2&3               |
| 23                                  | Description of statistical methods (eg, complete description of fixed or random effects models, justification of whether the chosen models account for predictors of study results, dose-response models, or cumulative meta-analysis) in sufficient detail to be replicated | 9&10                      |
| 24                                  | Provision of appropriate tables and graphics                                                                                                                                                                                                                                 | 27-36                     |
| Reporting of results should include |                                                                                                                                                                                                                                                                              |                           |
| 25                                  | Graphic summarizing individual study estimates and overall estimate                                                                                                                                                                                                          | Figures 2&3               |
| 26                                  | Table giving descriptive information for each study included                                                                                                                                                                                                                 | Table 1-3                 |
| 27                                  | Results of sensitivity testing (eg, subgroup analysis)                                                                                                                                                                                                                       | Figures 2&3               |
| 28                                  | Indication of statistical uncertainty of findings                                                                                                                                                                                                                            | 19                        |



# BMJ Open

**Low alcohol consumption and pregnancy and childhood outcomes: time to change guidelines indicating apparently 'safe' levels of alcohol during pregnancy? A systematic review and meta-analyses.**

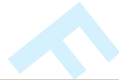

|                                 |                                                                                                                                                                                                                                                                                                                                                                                                                                                                                                                                                                                                                                                                                                                                                                                                                                                  |
|---------------------------------|--------------------------------------------------------------------------------------------------------------------------------------------------------------------------------------------------------------------------------------------------------------------------------------------------------------------------------------------------------------------------------------------------------------------------------------------------------------------------------------------------------------------------------------------------------------------------------------------------------------------------------------------------------------------------------------------------------------------------------------------------------------------------------------------------------------------------------------------------|
| Journal:                        | <i>BMJ Open</i>                                                                                                                                                                                                                                                                                                                                                                                                                                                                                                                                                                                                                                                                                                                                                                                                                                  |
| Manuscript ID                   | bmjopen-2016-015410.R1                                                                                                                                                                                                                                                                                                                                                                                                                                                                                                                                                                                                                                                                                                                                                                                                                           |
| Article Type:                   | Research                                                                                                                                                                                                                                                                                                                                                                                                                                                                                                                                                                                                                                                                                                                                                                                                                                         |
| Date Submitted by the Author:   | 24-Apr-2017                                                                                                                                                                                                                                                                                                                                                                                                                                                                                                                                                                                                                                                                                                                                                                                                                                      |
| Complete List of Authors:       | Mamluk, Loubaba; University of Bristol School of Social and Community Medicine, IEU<br>Edwards, Hannah; University of Bristol, School of Social and Community Medicine<br>Savovic, Jelena; University of Bristol, NIHR CLAHRC West<br>Leach, Verity; University of Bristol<br>Jones, Tim; NIHR CLAHRC West,<br>Moore, Theresa; NIHR CLAHRC West<br>Ijaz , Sharea ; NIHR CLAHRC West<br>Lewis, Sarah; University of Bristol, School of Social and Community Medicine<br>Donovan, Jenny; NIHR CLAHRC West<br>Lawlor, Debbie; Department of Social Medicine, University of Bristol, MRC Integrative Epidemiology Unit<br>Davey Smith, George; University of Bristol, Social Medicine<br>Fraser, Abigail; University of Bristol, MRC Integrative Epidemiology Unit<br>Zuccolo, Luisa; University of Bristol, School of Social and Community Medicine |
| <b>Primary Subject Heading</b>: | Epidemiology                                                                                                                                                                                                                                                                                                                                                                                                                                                                                                                                                                                                                                                                                                                                                                                                                                     |
| Secondary Subject Heading:      | Reproductive medicine                                                                                                                                                                                                                                                                                                                                                                                                                                                                                                                                                                                                                                                                                                                                                                                                                            |
| Keywords:                       | PAEDIATRICS, EPIDEMIOLOGY, Maternal medicine < OBSTETRICS                                                                                                                                                                                                                                                                                                                                                                                                                                                                                                                                                                                                                                                                                                                                                                                        |
|                                 |                                                                                                                                                                                                                                                                                                                                                                                                                                                                                                                                                                                                                                                                                                                                                                                                                                                  |

SCHOLARONE™  
Manuscripts

1  
2  
3 Systematic Review & Meta-analysis  
4  
5  
6

7 **Title:** Low alcohol consumption and pregnancy and childhood outcomes: time to change  
8 guidelines indicating apparently 'safe' levels of alcohol during pregnancy? A systematic review  
9 and meta-analyses.  
10  
11  
12

13  
14  
15 **Running title:** Low alcohol consumption and pregnancy and childhood outcomes.  
16  
17

18  
19 **Authors:** Loubaba Mamluk PhD<sup>1,2,3</sup>, Hannah B Edwards MSc<sup>2,3</sup>, Jelena Savović PhD<sup>2,3</sup>, Verity  
20 Leach PhD<sup>2,3</sup>, Timothy Jones PhD<sup>2,3</sup>, Theresa HM Moore MSc<sup>2,3</sup>, Sharea Ijaz PhD<sup>2,3</sup>, Sarah  
21 J. Lewis PhD<sup>2</sup>, Jenny L. Donovan PhD<sup>2,3</sup>, Debbie Lawlor PhD<sup>1,2,3</sup>, George Davey Smith PhD  
22 <sup>1,2</sup>, Abigail Fraser PhD<sup>\*1,2</sup>, Luisa Zuccolo PhD<sup>\*1,2</sup>  
23  
24  
25  
26

27 *\* Joint Last Authors*  
28  
29

30  
31  
32 **Author addresses:** Hannah B Edwards, Jelena Savovic, Verity Leach, Timothy Jones,  
33 Theresa HM Moore, Sharea Ijaz, and Jenny L. Donovan: NIHR CLAHRC West, University  
34 Hospitals Bristol, NHS Foundation Trust, 9th Floor, Whitefriars, Lewins Mead, Bristol, BS1  
35 2NT, United Kingdom. Sarah J. Lewis, Debbie Lawlor, George Davey Smith, Abigail Fraser,  
36 and Luisa Zuccolo: MRC Integrative Epidemiology Unit, School of Social and Community  
37 Medicine, University of Bristol, Oakfield House, Oakfield Grove, Bristol BS8 2BN, United  
38 Kingdom.  
39  
40  
41  
42  
43  
44  
45

46  
47 **Corresponding author:** Loubaba Mamluk, MRC Integrative Epidemiology Unit, School of  
48 Social and Community Medicine, University of Bristol, Oakfield House, Oakfield Grove, Bristol  
49 BS8 2BN, United Kingdom. NIHR CLAHRC West, University Hospitals Bristol  
50 NHS Foundation Trust, 9<sup>th</sup> Floor, Whitefriars, Lewins Mead Bristol, BS1 2NT. United Kingdom  
51 T+44 (0)117 3313378, l.mamluk@bristol.ac.uk  
52  
53  
54  
55  
56

**Author affiliations:**

- 1- MRC Integrative Epidemiology Unit at the University of Bristol, Bristol
- 2- School of Social and Community Medicine, University of Bristol, Bristol
- 3- NIHR CLAHRC West, University Hospitals Bristol NHS Foundation Trust, Bristol

**Word Count:** 3802**Figures:** 3**Tables:** 3**Supplementary Tables:** 3**Supplementary Figures:** 1**Supplementary Document:** 1**Number of references:** 61

## Abstract:

**Objectives:** To determine the effects of low-to-moderate levels of maternal alcohol consumption in pregnancy on pregnancy and longer-term offspring outcomes.

**Search Strategy:** Medline, Embase, Web of Science, and Psycinfo from inception to 11-07-2016.

**Selection Criteria:** Prospective observational studies, negative control and quasi-experimental studies of pregnant women estimating effects of light drinking in pregnancy ( $\leq 32\text{g/week}$ ) versus abstaining. Pregnancy outcomes such as birth weight, and features of fetal alcohol syndrome were examined.

**Data Collection and Analysis:** One reviewer extracted data and another checked extracted data. Random effects meta-analyses were performed where applicable, and a narrative summary of findings was carried out otherwise.

**Main Results:** 24 cohort and two quasi-experimental studies were included. With the exception of birth size and gestational age, there was insufficient data to meta-analyse or make robust conclusions. Odds of small-for-gestational-age (SGA) and preterm birth were higher for babies whose mothers consumed up to  $32\text{g/week}$  versus none, but estimates for preterm birth included the null value: summary odd ratios (OR) 1.08, 95% confidence intervals (CI) (1.02 to 1.14),  $I^2$  0%, (7 studies, all estimates were adjusted) OR 1.10, 95%CI (0.95 to 1.28),  $I^2$  60%, (9 studies, includes one unadjusted estimates) respectively. The earliest time points of exposure were used in the analysis.

**Conclusion:** Evidence of the effects of drinking  $\leq 32\text{g/w}$  in pregnancy is sparse. As there was some evidence that even light prenatal alcohol consumption is associated with being SGA and preterm delivery, guidance could advise abstention as a precautionary principle, but should explain the paucity of evidence.

**Keywords:** Alcohol, pregnancy, systematic review.

## Strengths and Limitations of this study:

### Strengths

- Completeness of searches with a focused research question aimed at informing alcohol in pregnancy guidelines.
- Biases minimised by only including those with prospective assessment of exposure and prioritising results adjusted for main confounders.
- Unique effort to include alternative study designs to further improve causal inference alongside standard analytical approaches.

### Limitations

- Limitation of results on the effects of light drinking in pregnancy from standard analytical approaches is bias due to residual confounding.
- The inclusion of only English language studies may have led to missing some studies, however there is little evidence that exclusion of non-English language studies leads to systematic bias in systematic reviews of conventional medicine.
- We could not pool eligible studies for various reasons (e.g. too few studies, lack of standard errors)

**Keywords:** Alcohol, pregnancy, systematic review.

## Introduction

Alcohol is a known teratogen[1] and the evidence about the risks of heavy alcohol consumption during pregnancy on intellectual ability, birth defects, behaviour, fine motor skills, and mental health (comprising fetal alcohol spectrum disorder – FASD)[2] is clear and compelling.[3] Internationally, clinical guidelines recommend that pregnant women should abstain from heavy or “binge” drinking.[4] However, until recently UK guidelines advised women to avoid drinking alcohol while trying to conceive, and in the first trimester, but at the same time indicated that consumption should be restricted to within “1 to 2 UK units, once or twice a week”. [5] The UK Chief Medical Officer (CMO) commissioned a review of guidelines on alcohol consumption during pregnancy. Based on a review of reviews, the Guidelines Development Expert Group has recently proposed a change to guidelines such that women should be advised to abstain from alcohol when pregnant and/or trying to conceive,[6] based on the precautionary principle (i.e. “better safe than sorry”), in the absence of robust evidence.

Our aim was to conduct a comprehensive systematic review and meta-analysis of the literature to determine the effects of low-to-moderate levels of maternal alcohol consumption in pregnancy on pregnancy and longer term offspring outcomes. Here we report on alcohol consumption of up to two UK units of alcohol up to twice a week (the equivalent of ~ 32g/week), compared to no alcohol. In the absence of evidence from randomised controlled trials, we examine observational studies of pregnant women from the general population with prospective assessment of alcohol exposure, to reduce recall bias. In particular, we specifically seek out quasi-experimental studies, negative control comparisons, and Mendelian randomisation analyses in order to reduce the impact of confounding and measurement error on the effect estimates.

## Methods

### Selection strategy and selection criteria

A full protocol of this systematic review carried out using PRISMA guidelines[7] is available from the PROSPERO systematic review register (registration number CRD4201501594); [http://www.crd.york.ac.uk/PROSPERO/display\\_record.asp?ID=CRD42015015941](http://www.crd.york.ac.uk/PROSPERO/display_record.asp?ID=CRD42015015941)).

In brief, eligible studies were defined as epidemiological studies of pregnant women or women trying to conceive with prospective assessment of prenatal alcohol exposure (i.e. before birth), sampled from general population. The protocol specifically included studies using standard analytical approaches (e.g. multivariable regression analysis), as well as studies that used innovative analytical methods to improve causal inference, such as (i) quasi-experimental studies (for example comparing outcomes before and after implementation of new guidelines on alcohol consumption); (ii) negative control studies (e.g. comparing the association of offspring outcomes with maternal alcohol consumption to the association of the same outcomes with consumption among fathers, under the assumption that confounding is likely to be similar but that if there was a direct causal effect of maternal consumption on outcomes, maternal associations would be stronger); and Mendelian randomisation studies (using genetic variants associated with alcohol consumption and metabolism). We considered these analytical approaches to be the most appropriate in terms of their ability to minimise bias from confounding and other sources. Our original protocol included studies exploring the effects of prenatal alcohol consumption up to 83g/week (the commonly used threshold for moderate consumption [8-10]) versus abstinence. Here we have focused specifically on low alcohol consumption, i.e. up to 32g/week as this was the cut-off specified by the UK guidelines at the time of writing this review as being an implicitly “safe” threshold.[5] This specific cut off value has not been reviewed and is the main point of discussion as the guideline change from low consumption (equating to 1 to 2 UK units, once or twice a week or 32g/week) to abstinence (reference group).

1  
2  
3 Outcomes included: 1) pregnancy outcomes: still birth (pregnancy loss after week 24;  
4 miscarriage; gestational length and preterm delivery (<37 weeks gestation); hypertensive  
5 disorders of pregnancy; gestational diabetes; small for gestational age (SGA), < 10th  
6 percentile in weight or <-2 standard deviation scores) and birth size (weight (including low  
7 birth weight defined as <2500g), length, and head circumference); low amniotic fluid  
8 (oligohydramnios); placenta previa; placental abruption; assisted delivery (including vacuum  
9 extraction, forceps delivery, Caesarean section); Apgar score at birth; admission to neonatal  
10 unit; congenital malformations. 2) Features of foetal alcohol spectrum disorder (FASD):  
11 childhood growth restriction; cranium size and head circumference; developmental delays;  
12 behaviour problems; cognitive impairment and intelligent quotient (IQ); facial malformations.  
13 We adopted study specific definitions for all outcomes.  
14  
15  
16  
17  
18  
19  
20  
21  
22  
23  
24  
25

26 Studies were excluded if: there was no quantitative measure of alcohol consumption that  
27 could be converted to grams of alcohol/week; there was insufficient data to estimate the  
28 effect size of the association of our pre-defined low consumption categories versus  
29 abstinence with any outcome, including studies that analysed alcohol as a continuous  
30 variable (i.e. assuming the same linear or log linear effect across the entire alcohol  
31 distribution); the lowest exposure category (compared to non-drinkers) had an upper bound  
32 exceeding 32g/week, or was unspecified; they were cohort studies of pregnant women with  
33 alcohol abuse/dependency; they were case-control studies or cohort studies with  
34 retrospective alcohol consumption assessment (e.g. after birth).  
35  
36  
37  
38  
39  
40  
41  
42  
43

44 The following databases were searched: MEDLINE, PsycINFO, EMBASE on Ovid; the  
45 Cochrane Library including CENTRAL (the Cochrane Central Database of Controlled Trials)  
46 on Wiley Interscience; and Science Citation Index, Social Science Citation Index, on Web of  
47 Science from inception to 11 July 2016 (supplementary Table 1). We limited the search to  
48 English language papers and excluded animal studies, letters, editorials, and conference  
49 proceedings for which there were no full-text papers. Searches were tailored to each  
50  
51  
52  
53  
54  
55  
56  
57  
58  
59  
60



1  
2  
3 database by investigators. The search focused on published medical literature and did not  
4 include grey literature. We additionally performed manual searches of the reference lists of:

5  
6  
7 (i) all papers included in recent systematic reviews of the effects of prenatal alcohol  
8 exposure on the outcomes of interest; and (ii) all recent papers citing those reviews.

9  
10  
11 Titles and abstracts, and full texts if necessary, were screened independently by two  
12 reviewers. Discrepancies were discussed and disagreements resolved through consensus.

13  
14  
15 We assessed potential for bias in included studies by assessing how well the study adjusted  
16 for several main confounders known to impact on the exposure-outcome associations  
17 (socioeconomic positioning as measured by the individual study, smoking during pregnancy,  
18 maternal age, and ethnicity). We considered the potential for confounding and bias across  
19 studies included in the analyses and described it narratively alongside summary results.  
20  
21  
22  
23  
24

### 25 26 Data extraction

27  
28 Data were extracted into a custom-built Microsoft Access database. We extracted the  
29 following information from each study: title, authors, publication year, country/region, study  
30 design, population characteristics (sample size, methods of sampling, age distribution, and  
31 ethnicity), measures of exposure (assessment method; including timing and quantification of  
32 alcohol consumption, reference group (abstinence), exposure (e.g 1-2 units or 2-4 units),  
33 and information on unit equivalence if stated), outcome assessment methods (including  
34 whether this was abstracted from medical records, obtained via a research interview and the  
35 person reporting the outcome e.g. parent, teacher, health professional, researcher or child),  
36 model adjustments, and study results. If a study reported more than one result for each  
37 outcome, we extracted all of them (e.g. relative to different timing of exposure, model  
38 adjustments, etc.). Information from each included paper was extracted by one reviewer  
39 (LM) and subsequently checked for accuracy and completeness by another reviewer  
40 (HE).[11] Extraction errors were minimal and were resolved through discussion between  
41 extractor and checker.  
42  
43  
44  
45  
46  
47  
48  
49  
50  
51  
52  
53  
54  
55  
56  
57  
58  
59  
60

### Alcohol unit conversion

Alcohol consumption in drinks/week was converted into grams/week based on the pure ethanol equivalent of one drink, as stated in each individual article, or otherwise inferred based on the definition of standard drinks in the country where the study took place.

### Data analysis

The association of low alcohol use with pregnancy and related outcomes was investigated comparing the highest category within the range of 0-32g/week to abstinence (during pregnancy). In studies providing data across several categories of intake within the 0-32g/week range, we used the effect estimate for the highest category of intake. If studies reported on exposure to alcohol during different trimesters, we included estimates relative to the earliest exposure. This is because for some outcomes, the first trimester tends to be the most critical timing/window of exposure [12] [13] and because most studies that only reported on one time point reported on exposure in early gestation. Similarly, if results were available from both unadjusted and adjusted regressions, we prioritised fully adjusted results, as a way of minimising the impact of confounding by important factors such as maternal smoking, age, socio-economic position and ethnicity. In case of multiple results from the same cohort (relative to the same outcome), we analysed those pertaining to the largest population size (i.e. conducted on the least 'selected' population as result of exclusions, to minimise selection bias). Results from all studies that fulfilled our inclusion criteria were summarised, together with information about the study. Where appropriate, we additionally pooled results for each outcome. Authors were not contacted for extra data. Results from Different study designs have been reviewed separately. Individual study estimates were pooled using random effects meta-analysis. Where only two studies were available to meta-analyse, results were pooled unless they were very different from each other ( $I^2 \geq 50\%$ ). [14] In this case, a narrative summary of findings was carried out and results were reported in Table 2. Where a study only reported unadjusted results, we kept

1  
2  
3 these separate in the forest plots (sub-group analysis) but then also showed overall pooled  
4  
5 estimates combining all results.

6  
7 Planned sub-group analyses by trimester could not be performed due to insufficient number  
8  
9 of included studies with this information.

#### 10 11 Risk of bias assessment

12  
13 The Newcastle-Ottawa Scale (NOS) [15] was used to assess risk of bias for included  
14  
15 reports. This is an eight-item questionnaire assessing the following: representativeness of  
16  
17 the exposed cohort; selection of the non-exposed cohort; exposure assessment methods;  
18  
19 absence of outcome (of interest) at the start of the study; comparability of exposed and non-  
20  
21 exposed groups (with regard to confounding variables); blind assessment of exposure and  
22  
23 outcome; and length and adequacy of follow up. NOS allocates 'stars' for adequate  
24  
25 methods, but does not specifically advise calculating the sum of allocated stars to give an  
26  
27 overall score. Scores for quality are not helpful in assessing the effect of risk of bias on a  
28  
29 meta-analysis so we report each item separately in line with recommended methods [16 17].  
30  
31 To be assessed as adequate for comparability of cohorts (risk of confounding) a study had to  
32  
33 control for the following four pre-specified potential confounding factors related to foetal  
34  
35 development: maternal age, socio-economic status (SES), ethnicity, and smoking.  
36  
37

38  
39 The likelihood of small study bias, such as publication bias, could not be assessed through  
40  
41 visual inspection of funnel plots for pooled analyses as no outcome was assessed by 10+  
42  
43 studies [18]. Statistical analyses were carried out using Stata version 13.1 (StataCorp,  
44  
45 College Station, TX, USA).[19]  
46  
47

#### 48 **Results**

49 A flowchart of the article review process is shown in Figure 1. A total of 4680 citation records  
50  
51 were identified from searching the four relevant databases. A manual search of recent  
52  
53 systematic reviews identified 33 additional articles. After exclusions, 24 prospective studies  
54  
55

1  
2  
3 analysed using standard approaches and two quasi-experimental studies were included,  
4 reporting on 30 outcomes in total.  
5

#### 6 Risk of bias

7  
8  
9 Six studies (Albertson 2003; Anderson 2012; Bille 2007; Brooke 1989; Lundsberg 2015;  
10 McCarthy 2013) had low risk of bias for all eight NOS items and were therefore considered  
11 at low risk of bias overall. All studies were judged to be at a low risk of bias for the following  
12 three NOS items: selection of the non-exposed cohort (always from the same source  
13 population as the exposed cohort); the absence of outcome at the start of the study; and  
14 adequate length of follow up for outcome to have occurred. Fourteen studies had adequate  
15 ascertainment of exposure as these were all based on structured interviews or validated  
16 records. Objective outcome assessments (assessor unaware of the exposure status) were  
17 reported in 16 of the studies. For five others either parent self-report was used (high risk),  
18 and for the remaining three the method of outcome assessment was not reported (unclear  
19 risk). Eleven studies did not report enough detail to decide if cohorts were representative of  
20 the population, therefore only 10 could be judged as low risk. Only four studies did not  
21 control for the pre-specified potential confounding factors, and one did not report enough  
22 detail to permit judgement. Thus, in the majority of studies (19) the compared groups were  
23 similar. Nineteen studies had adequate follow up of the cohort (small loss to follow up). Only  
24 three were judged high risk for this item and two studies presented insufficient information to  
25 make a clear judgment. Standard analytical approaches  
26  
27  
28  
29  
30  
31  
32  
33  
34  
35  
36  
37  
38  
39  
40  
41  
42  
43

44 Pooled estimates for continuous and binary outcomes are presented in Figure 2 and 3  
45 respectively.  
46

47  
48 Figure 2 presents results for birthweight (7 studies). Figure 3A presents results for preterm  
49 delivery (9 studies) Figure 3B, presents results for SGA (7 studies), and results for low  
50 birthweight (6 studies) are given in Figure 3C.  
51  
52  
53  
54  
55  
56  
57  
58  
59  
60

1  
2  
3 The meta-analysis yielded a summary OR of 1·10 (95% CI 0·95; 1·28) for preterm delivery,  
4 but there was substantial statistical heterogeneity between studies ( $I^2=60\%$ ), due to a large  
5 Danish study reporting a protective effect (Figure 3A). Additionally, most studies assessing  
6 preterm birth had corrected for main confounders known to be associated with preterm birth,  
7 with the exception of [20] that did not correct for any. There was also modest evidence for  
8 an increased risk of being SGA (OR 1·08, 95% CI 1·02; 1·14) for a total of 288512  
9 participants, although this was almost entirely driven by a single US study contributing 95%  
10 of the participants to this meta-analysis (Figure 3B). The birthweight meta-analysis yielded a  
11 summary effect of -13·49g (95% CI -30·28g; +3·31g) for offspring of light drinkers versus  
12 non-drinkers (Figure 2). Summary effect for birthweight <2500g was, OR 1·00, 95% CI 0·82;  
13 1·22 (Figure 3C).

14  
15  
16  
17  
18  
19  
20  
21  
22  
23  
24  
25 Other outcomes were typically reported by a limited number of studies and mostly could not  
26 be meta-analysed due to clinical heterogeneity in outcome assessment or incompleteness of  
27 published data (supplementary Figure 1, and Table 2). Based on two studies with data on  
28 behavioural outcomes, there was little evidence of any effect for internalising symptoms but  
29 a suggestion that light drinking in pregnancy protected against high externalising behaviour  
30 scores (OR 0·97, (95%CI 0·93; 1·01, supplementary Figure 1)). However, an additional  
31 study assessing conduct problems and hyperactivity (in the same externalising domain)  
32 reported results in the opposite direction, which could not be meta-analysed due to different  
33 outcome definitions.

34  
35  
36  
37  
38  
39  
40  
41  
42  
43  
44 Table 2 presents results of included studies that did not contribute to the meta-analyses for  
45 various reasons. There was no strong evidence of association between consuming up to 32  
46 g/week of alcohol and any of the remaining outcomes excluded from meta-analyses, with  
47 three exceptions: a very large US study showing increased risk of placental abruption and  
48 decreased risk of pre-eclampsia (OR 1·24, 95%CI 1·05; 1·46 and OR 0·82, 95% CI 0·74;  
49 0·90, respectively)[21], and a single British study reporting better cognitive outcomes in  
50 children exposed to light maternal drinking in pregnancy.[22]

1  
2  
3 We did not include funnel plots as no outcome was assessed by 10+ studies.

4  
5 Of all included results, only two were unadjusted[20 23], and most of the others were  
6  
7 adjusted for maternal smoking, age and socio-economic position (supplementary Table 2).  
8  
9 Studies that did not adjust for ethnicity were generally conducted in homogenous  
10  
11 populations. Due to the small number of studies for each outcome, we could not further  
12  
13 investigate the effect of adjusting for all or some of these confounders. Similarly, there was  
14  
15 insufficient data to examine the effect of timing of exposure on outcomes.  
16  
17

### 18 Alternative analytical approaches

19 Two negative control publications[24] based on the same UK cohort met our inclusion  
20  
21 criteria.[23 25] They investigated the effects of maternal alcohol consumption on childhood  
22  
23 educational achievement[25] and IQ.[23] Offspring exposed to maternal consumption of  
24  
25 <12g/week of alcohol in the first trimester did not have worse outcomes compared to those  
26  
27 of mothers who abstaining from alcohol, and a similar pattern was found for paternal alcohol  
28  
29 consumption.  
30

31 One further quasi-experimental study, one natural experiment and five Mendelian  
32  
33 randomisation studies were excluded from the present review because they did not  
34  
35 specifically test the effect of consuming up to 32g/week in pregnancy versus abstaining.  
36  
37 These will be included in a forthcoming review focused on estimating the causal effects of  
38  
39 prenatal alcohol exposure based on alternative study designs and analytical approaches to  
40  
41 strengthen causal evidence.  
42  
43  
44  
45  
46  
47  
48  
49  
50  
51  
52  
53  
54  
55  
56  
57  
58  
59  
60

**Table 1.** Prospective studies examining the effects of prenatal alcohol exposure on pregnancy outcomes (studies included in the meta-analysis)

| Study (year)          | Country                                 | Event             | Total number | Outcomes                                                                                                                                                                                                                       | Timing of exposure                                        | Age at outcome assessment (child) | Adjusted (yes/no) |
|-----------------------|-----------------------------------------|-------------------|--------------|--------------------------------------------------------------------------------------------------------------------------------------------------------------------------------------------------------------------------------|-----------------------------------------------------------|-----------------------------------|-------------------|
| [26] Lundsberg (2015) | USA                                     | 191<br>315<br>274 | 3,907        | Birth weight (<2500g)<br>SGA (< 10 <sup>th</sup> percentile)<br>Preterm birth (<37 weeks)                                                                                                                                      | 1 <sup>st</sup> trimester                                 | Birth                             | Yes               |
| [27] Nykjaer (2014)   | UK                                      | -<br>-<br>-<br>23 | 535          | Birth weight (g)<br>Customised birth centile<br>SGA (< 10 <sup>th</sup> centile)<br>Low birth weight (<2500g)<br>Preterm birth (<37 weeks)                                                                                     | 1 <sup>st</sup> trimester                                 | Birth                             | Yes               |
| [28] Niclasen (2014)  | Denmark                                 | -                 | 10,649       | 10% with highest problem scores, Strengths & Difficulties Questionnaire (SDQ), Parent report<br>Boys Internalising behaviour<br>Girls Internalising behaviour<br>Boys Externalising behaviour<br>Girls Externalising behaviour | Entire pregnancy                                          | 7 years                           | Yes               |
| [29] Miyake (2014)    | Japan                                   | 126<br>185<br>-   | 1,493        | Preterm birth (<37 weeks)<br>SGA (< 10 <sup>th</sup> percentile)<br>Adjusted mean birth weight<br>Low birth weight (<2500g)                                                                                                    | Between 5th and 39th weeks of pregnancy                   | 0-11 months                       | Yes               |
| [30] McCarthy (2013)  | New Zealand, Australia, UK, and Ireland | 202<br>325<br>150 | 3166         | Birthweight<br>SGA (< 10 <sup>th</sup> percentile)<br>Preterm birth (<37 weeks)                                                                                                                                                | 1 <sup>st</sup> trimester                                 | Birth                             | yes               |
| [21] Salihu (2011)    | USA                                     | -                 | -            | Preterm birth (<37 weeks)<br>SGA (< 10 <sup>th</sup> percentile)                                                                                                                                                               | Within the gestational age range 20-44 weeks              | Birth                             | Yes               |
| [31] Robinson (2010)  | Australia                               | 202               | 1335         | Clinically significant problems (T score ≥60), Child Behaviour Checklist (CBCL)<br>Parent report<br>Internalising behaviour<br>Externalising behaviour                                                                         | 2nd trimester                                             | 2-14 years inclusive              | Yes               |
| [32] Jaddoe (2007)    | Holland; UK                             | -<br>-<br>-       | 4,132        | Low birth weight<br>SGA (weight < -2 standard deviation scores)<br>Preterm birth (<37 weeks)<br>Birth weight                                                                                                                   | Late pregnancy                                            | Birth                             | Yes               |
| [33] Sayal (2007)     | UK                                      | -                 | 10,323       | 10% with highest problem scores, Strengths & Difficulties Questionnaire (SDQ)<br>parent report <i>Hyperactivity</i> - Externalising                                                                                            | 1st trimester                                             | 7.75 years                        | Yes               |
| [33] Sayal (2007)     | UK                                      | -                 | 10,323       | 10% with highest problem scores, Strengths & Difficulties Questionnaire (SDQ)<br>parent report <i>Conduct problems</i> - Externalising                                                                                         | 1st trimester                                             | 7.75 years                        | Yes               |
| [34] Albertsen (2004) | Denmark                                 | 1488              | 29,463       | Preterm birth (<37 weeks)<br>Moderate preterm birth (32-37 weeks)<br>Very preterm birth (<32 weeks)                                                                                                                            | During pregnancy                                          | Birth                             | Yes               |
| [35] Lundsberg (1997) | USA                                     |                   | 2,062        | SGA (lowest 10 <sup>th</sup> percentile)<br>Low birth weight<br>Preterm delivery (<37 weeks)                                                                                                                                   | 1 <sup>st</sup> trimester                                 | Birth                             | Yes               |
| [36] Passaro (1996)   | UK                                      |                   | 8,886        | Birth weight (g)                                                                                                                                                                                                               | At booking for antenatal care (before 24 weeks gestation) | Birth                             | Yes               |
| [37] Shu (1995)       | USA                                     |                   | 638          | Birth weight (g)                                                                                                                                                                                                               | Throughout pregnancy (12.9, 28 & 36 weeks gestation)      | Birth                             | Yes               |
| [20] Peacock (1995)   | UK                                      | 64                | 901          | Preterm birth (<37 weeks)                                                                                                                                                                                                      | At booking for antenatal care (before 24 weeks gestation) | Birth                             | No                |

1  
2  
3  
4  
5  
6  
7  
8  
9  
10  
11  
12  
13  
14  
15  
16  
17  
18  
19  
20  
21  
22  
23  
24  
25  
26  
27  
28  
29  
30  
31  
32  
33  
34  
35  
36  
37  
38  
39  
40  
41  
42  
43  
44  
45  
46  
47  
48  
49

|                    |         |       |                       |                                     |       |     |
|--------------------|---------|-------|-----------------------|-------------------------------------|-------|-----|
| [38] Olsen (1991)  | Denmark | 8772  | Birth weight (<2500g) | During the first 36 weeks gestation | Birth | yes |
| [39] Brooke (1989) | UK      | 1,140 | Birthweight (g)       | Early pregnancy                     | Birth | yes |

SGA: small for gestation age

For peer review only



**Table 2.** Prospective studies examining the effects of prenatal alcohol exposure on pregnancy outcomes (results not included in the meta-analysis)

| Outcome                                                    | Study (year)          | Country (Total number)                                                   | Outcome details                                          | Reason not included in meta-analysis  | Age at outcome assessment (child)                                               | Results <sup>[1]</sup>                                                                               | Adjusted (yes/no) |
|------------------------------------------------------------|-----------------------|--------------------------------------------------------------------------|----------------------------------------------------------|---------------------------------------|---------------------------------------------------------------------------------|------------------------------------------------------------------------------------------------------|-------------------|
| <b>Pregnancy outcomes</b>                                  |                       |                                                                          |                                                          |                                       |                                                                                 |                                                                                                      |                   |
| <b>Stillbirth</b>                                          | [40] Andersen (2012)  | Denmark (89,322)                                                         | Stillbirth                                               | Estimates are in different directions | (Outcome confirmed via National / Hospital Registries, or from maternal report) | OR 0.90 (95% CI 0.73 – 1.12)                                                                         | Yes               |
|                                                            | [21] Salihi (2011)    | USA (1,226,685)                                                          | Stillbirth                                               | Estimates are in different directions | Birth                                                                           | OR 1.10 (95% CI 0.88 – 1.39)                                                                         | Yes               |
| <b>Miscarriage</b>                                         | [40] Andersen (2012)  | Denmark (89,322)                                                         | Miscarriage in first trimester                           | Only study with this outcome          | (Outcome confirmed via National / Hospital Registries, or from maternal report) | OR 1.05 (95% CI 0.94 – 1.18)                                                                         | Yes               |
|                                                            | [41] Windham (1997)   | USA (5,324)                                                              | Spontaneous abortion occurring ≤20 weeks gestation       | Only study with this outcome          | (Outcome confirmed via medical records)                                         | OR 1.0 (95% CI 0.7 – 1.5)                                                                            | Yes               |
| <b>Gestational age and preterm birth</b>                   | [36] Passaro (1996)   | UK (10,539)                                                              | Gestational age                                          | Only study with this outcome          | Birth                                                                           | Mean gestational age 40.1 (SD 1.9) for those exposed, compared to 40.1 (SD 2.0) for those unexposed. | Yes               |
|                                                            | [42] Ogston (1992)    | Netherlands, Scotland, France, Spain, Denmark, Germany, Portugal (8,453) | Per cent of infants with gestational age <37 weeks       | SE/SD not reported                    | Birth                                                                           | 3.7% in those exposed compared to 3.9% in those unexposed.                                           | Yes               |
| <b>Birthweight</b>                                         | [42] Ogston (1992)    | Netherlands, Scotland, France, Spain, Denmark, Germany, Portugal (8,453) | Mean birthweight (g) in non-smokers                      | SE/SD not reported                    | Birth                                                                           | 3414g in those exposed, compared to 3363g in those unexposed.                                        | Yes               |
|                                                            | [42] Ogston (1992)    | Netherlands, Scotland, France, Spain, Denmark, Germany, Portugal (8,453) | Mean birthweight (g) in smokers                          | SE/SD not reported                    | Birth                                                                           | 3225g in those exposed, compared to 3225g in those unexposed.                                        | Yes               |
| <b>Placenta-related</b>                                    | [21] Salihi (2011)    | USA (1,226,685)                                                          | Placental abruption                                      | Only study with this outcome          | Birth                                                                           | OR 1.24 (95% CI 1.05 – 1.46)                                                                         | Yes               |
| <b>Pre-eclampsia</b>                                       | [21] Salihi (2011)    | USA (1,226,685)                                                          | Placenta previa                                          | Only study with this outcome          | Birth                                                                           | OR 1.11 (95% CI 0.87 – 1.43)                                                                         | Yes               |
|                                                            | [21] Salihi (2011)    | USA (1,226,685)                                                          | Pre-eclampsia                                            | Only two studies with this outcome    | Birth                                                                           | OR 0.82 (95% CI 0.74 – 0.90)                                                                         | Yes               |
|                                                            | [30] McCarthy (2013)  | New Zealand, Australia, Ireland, UK                                      | Pre-eclampsia                                            | Only two studies with this outcome    | Birth                                                                           | OR 0.59 (95% CI 0.35 – 0.99)                                                                         | Yes               |
| <b>Height</b>                                              | [26] Lundsberg (2015) | USA (4,496)                                                              | Lowest 10 <sup>th</sup> percentile of birth length       | Only study with this outcome          | Birth                                                                           | OR 1.10 (95% CI 0.78 – 1.54)                                                                         | Yes               |
| <b>Head circumference</b>                                  | [26] Lundsberg (2015) | USA (4,496)                                                              | Lowest 10 <sup>th</sup> percentile of head circumference | Only study with this outcome          | Birth                                                                           | OR 1.08 (95% CI 0.83 – 1.42)                                                                         | Yes               |
| <b>Apgar score</b>                                         | [26] Lundsberg (2015) | USA (4,496)                                                              | Apgar <7 at 5 minutes                                    | Only study with this outcome          | Birth                                                                           | OR 1.61 (95% CI 0.67 – 3.84)                                                                         | Yes               |
| <b>Admission to Neonatal Intensive Care Unit (NICU)</b>    | [26] Lundsberg (2015) | USA (4,496)                                                              | Admission to NICU                                        | Only study with this outcome          | Birth                                                                           | OR 1.12 (95% CI 0.86 – 1.46)                                                                         | Yes               |
| <b>Features of foetal alcohol spectrum disorder (FASD)</b> |                       |                                                                          |                                                          |                                       |                                                                                 |                                                                                                      |                   |
| <b>Malformations</b>                                       | [26] Lundsberg (2015) | USA (4,496)                                                              | Major malformations                                      | Only study with this outcome          | Birth                                                                           | OR 0.78 (95% CI 0.40 – 1.50)                                                                         | Yes               |

1  
2  
3  
4  
5  
6  
7  
8  
9  
10  
11  
12  
13  
14  
15  
16  
17  
18  
19  
20  
21  
22  
23  
24  
25  
26  
27  
28  
29  
30  
31  
32  
33  
34  
35  
36  
37  
38  
39  
40  
41  
42  
43  
44  
45  
46  
47  
48  
49

|                               |                          |                                                                          |                                                                                                                      |                                        |               |                                                                                                         |     |
|-------------------------------|--------------------------|--------------------------------------------------------------------------|----------------------------------------------------------------------------------------------------------------------|----------------------------------------|---------------|---------------------------------------------------------------------------------------------------------|-----|
|                               | [43] Bille (2007)        | Denmark (1020)                                                           | Oral clefts                                                                                                          | Only study with this outcome           | Birth         | OR 1.06 (95% CI 0.74 – 1.50)                                                                            | Yes |
|                               | [44] Ernhart (1989)      | USA (873)                                                                | Craniofacial anomalies                                                                                               | SE/SD not reported                     | Birth         | Mean craniofacial anomalies was 1.92 for those exposed, compared to 1.85 for those unexposed (p=0.26)   | Yes |
|                               | [44] Ernhart (1989)      | USA (873)                                                                | Total anomalies                                                                                                      | SE/SD not reported                     | Birth         | Mean total anomalies was 2.60 for those exposed, compared to 2.53 for those unexposed (p=0.28)          | Yes |
| <b>Motor development</b>      | [45] Faebo Larsen (2013) | Denmark (32,097)                                                         | Developmental Coordination Disorder (DCD)                                                                            | Only study with this outcome           | 7 years       | OR 0.85 (95% CI 0.70 – 1.03)                                                                            | Yes |
| <b>Behaviour /development</b> | [33] Sayal (2007)        | UK (967)                                                                 | 10% with highest problem scores, Strengths & Difficulties Questionnaire (SDQ) parent report <i>Conduct problems</i>  | Later age used in analysis             | 3.9 years     | OR 1.14 (95% CI 0.98 – 1.32)                                                                            | Yes |
|                               | [33] Sayal (2007)        | UK (1077)                                                                | 10% with highest problem scores, Strengths & Difficulties Questionnaire (SDQ) parent report <i>Hyperactivity</i>     | Later age used in analysis             | 3.9 years     | OR 0.99 (95% CI 0.86 – 1.16)                                                                            | Yes |
|                               | [33] Sayal (2007)        | UK (257)                                                                 | 10% with highest problem scores, Strengths & Difficulties Questionnaire (SDQ) teacher report <i>Conduct problems</i> | Parent report used in analysis instead | 7.75- 9 years | OR 1.41 (95% CI 1.02– 1.94)                                                                             | Yes |
|                               | [33] Sayal (2007)        | UK (525)                                                                 | 10% with highest problem scores, Strengths & Difficulties Questionnaire (SDQ) teacher report <i>Hyperactivity</i>    | Parent report used in analysis instead | 7.75- 9 years | OR 1.20 (95% CI 0.96– 1.51)                                                                             | Yes |
|                               | [46] Parry (1992)        | Netherlands, Scotland, France, Spain, Denmark, Germany, Portugal (8,453) | Mental Development Index, Bayley Scales of Infant Development                                                        | No SE/SD reported for reference group  | 18 months     | Mean increase of 1.80 points (SE 1.1) for those exposed compared to unexposed.                          | Yes |
|                               | [46] Parry (1992)        | Netherlands, Scotland, France, Spain, Denmark, Germany, Portugal (8,453) | Psychomotor Development Index, Bayley Scales of Infant Development                                                   | No SE/SD reported for reference group  | 18 months     | Mean increase of 0.81 points (se 0.8) for those exposed compared to unexposed.                          | Yes |
| <b>Cognition</b>              | [22] Sayal (2013)        | UK (10,558)                                                              | Key Stage 2 scores                                                                                                   | Only study with this outcome           | 11 years      | Mean increase of 0.38 (95% CI -0.02 – 0.78) on KS2 score for those exposed compared to unexposed.       | Yes |
|                               | [23] Alati (2008)        | UK (4,332)                                                               | IQ, Weschler Intelligence Scale for Children (WISC-III)                                                              | Only study with this outcome           | 8 years       | Mean IQ score 106.4 (SD 16.3) in those exposed, compared to 105.7 (SD 16.2) in those unexposed, p=0.10. | No  |

[1] Odds Ratio results compare the odds of outcome in those exposed to  $\leq 32g$  AA per week. SE: Standard error SD: standard deviation SGA: small for gestation age IQ: intelligence quotient.

1  
2  
3  
4  
5  
6  
7  
8  
9  
10  
11  
12  
13  
14  
15  
16  
17  
18  
19  
20  
21  
22  
23  
24  
25  
26  
27  
28  
29  
30  
31  
32  
33  
34  
35  
36  
37  
38  
39  
40  
41  
42  
43  
44  
45  
46  
47  
48  
49

For peer review only

1  
2  
3  
4  
5  
6  
7  
8  
9  
10  
11  
12  
13  
14  
15  
16  
17  
18  
19  
20  
21  
22  
23  
24  
25  
26  
27  
28  
29  
30  
31  
32  
33  
34  
35  
36  
37  
38  
39  
40  
41  
42  
43  
44  
45  
46  
47  
48  
49

Table 3. Quasi-experimental studies examining the effects of prenatal alcohol exposure on pregnancy outcomes.

| Study (year)      | Country | Total Number | Study type                   | Gene | SNP-rs number | Age at outcome assessment (child) | Outcomes                                                | Summary of results & conclusions as presented in the paper                                                                                                                                               | Limitations                                                                                            |
|-------------------|---------|--------------|------------------------------|------|---------------|-----------------------------------|---------------------------------------------------------|----------------------------------------------------------------------------------------------------------------------------------------------------------------------------------------------------------|--------------------------------------------------------------------------------------------------------|
| [25] Alati (2013) | UK      | 7,062        | Maternal-paternal comparison | na   | na            | 11 years                          | Academic achievement: Key Stage 2 scores (standardised) | Maternal alcohol consumption abstainers: mean 102.0 (SD 9.1); <1 glass/week: mean 102.8 (SD 8.7)<br>Paternal alcohol consumption abstainers: mean 98.9 (SD 11); <1 glass/week: mean 101.1 (SD 9.1)       | Different confounding structures for the association of maternal vs. paternal alcohol with the outcome |
| [23] Alati (2008) | UK      | 4,332        | Maternal-paternal comparison | na   | na            | 8 years                           | IQ: Wechsler Intelligence Scale for Children (WISC)     | Maternal alcohol consumption abstainers: mean 105.7 (SD 16.2); <1 glass/week: mean 106.4 (SD 16.3)<br>Paternal alcohol consumption abstainers: mean 102.2 (SD 16.8); <1 glass/week: mean 104.0 (SD 16.7) | Different confounding structures for the association of maternal vs. paternal alcohol with the outcome |

Abbreviations: OR: Odds ratio CI: Confidence intervals MD: Mean difference SD: standard deviation IQ: Intelligence quotient.

## Discussion

Main findings: In this comprehensive systematic review of the literature on the effects of low levels of alcohol drinking in pregnancy, the two main findings are: i) a surprisingly limited number of prospective studies specifically addressing the question of whether light maternal alcohol consumption (i.e. up to 32g/week (or 4 UK units) has any causal effect (adverse or beneficial) on infant and later offspring outcomes and pregnancy outcomes, and, as a result, ii) a paucity of evidence demonstrating a clear detrimental effect, or safe limit, of light alcohol consumption on outcomes. The upper limit that we chose to examine here is that of the current version of the UK National Institute for Health and Care Excellence (NICE) guidelines.[47] The question we have attempted to address is very important given the mixed advice that women are given with regards to whether they should abstain completely or be allowed light alcohol consumption in pregnancy. The lack of research evidence to address this question is notable.

Strengths and limitations: Strengths of this review include the completeness of searches with a focused research question aimed at informing alcohol in pregnancy guidelines. In addition to observational studies' biases minimised by only including those with prospective assessment of exposure and prioritising results adjusted for main confounders. Another strength of this review is the unique effort to include alternative study designs to further improve causal inference alongside standard analytical approaches. The main limitation of results on the effects of light drinking in pregnancy from standard analytical approaches is bias due to residual confounding. SE position is a complex, multi-faceted entity. Several studies have attempted to adjust for SE position by collecting information on, for example, maternal education, family-level SE position around the time of the pregnancy, home address-based deprivation index etc. Few studies included more than one of these measured [22 29-31]. Whereas we consider attempting to adjust for at least one of these characteristics to be a minimum requirement to account for some of the confounding introduced by SE position, there remains scope for residual confounding.[48] Given the

1  
2  
3 strong relationship between SE position and both the exposure (alcohol use in pregnancy)  
4 and outcomes in this review, any degree of residual confounding is of course an issue when  
5 interpreting the effect estimates from the observational studies included in this review.  
6  
7

8  
9 Women who drink low amounts of alcohol may be more likely to be of higher socio-  
10 economic position, compared to abstainers, at least in developed settings in recent  
11 years,[49] and both of these characteristics are associated with better pregnancy and  
12 cognitive outcomes.[50] Maternal smoking and ethnicity are also known correlates of  
13 maternal alcohol use, and risk factors for e.g. low birth weight.[51] Most studies included in  
14 this review adjusted for at least some of these factors. However, due to the small number of  
15 studies included for any given outcome, it was impossible to formally investigate the effect of  
16 incomplete adjustment for some (or all) of these confounders. Additionally, for most  
17 outcomes, we could not pool eligible studies for various reasons (e.g. too few studies, lack of  
18 standard errors) and that we limited our review to a number of pre-specified outcomes  
19 including the most common pregnancy-related outcomes and childhood outcomes related to  
20 FASD. This also was the case for identifying effects based on time of exposure, which is  
21 also a limitation.  
22  
23  
24  
25  
26  
27  
28  
29  
30  
31  
32  
33  
34

35 The inclusion of only English language studies may have led to missing some studies,  
36 however there is little evidence that exclusion of non-English language studies leads to  
37 systematic bias in systematic reviews of conventional medicine.[52-55]  
38  
39  
40  
41  
42

43 Interpretation: This review demonstrates the paucity and poor quality of evidence addressing  
44 this important public health question, and the difficulty of designing studies that can  
45 effectively evaluate the causal impact of low alcohol consumption whilst minimising bias and  
46 confounding. It also shows the value of reporting measures of effect for meaningful  
47 categories of the exposure. Whilst many studies reported that associations did not differ from  
48 linearity prior to providing a single coefficient for the dose-response association, it is possible  
49 that statistical power limited the ability to detect non-linear associations in single studies.  
50  
51  
52  
53  
54  
55  
56  
57  
58  
59  
60

1  
2  
3 Such detail is especially important when there are controversies about the shape of the  
4 association of interest (linear, U or J-shaped) and/or the existence of safe thresholds.

5  
6 Outstanding questions also remain about the effects of maternal alcohol consumption at  
7 different stages of conception and pregnancy. Alternative analytical approaches such as  
8 sibling comparisons[56] and the use of instrumental variable approaches[57] as well as  
9 triangulating the totality of evidence from multiple study types[58] (formally or informally) are  
10 needed in order to strengthen confidence in the direction and size of any potential causal  
11 relationships.  
12

13  
14 The recently proposed change in the guidelines for alcohol use in pregnancy in the UK to  
15 complete abstinence, would be an application of the precautionary principle. This review  
16 confirmed some increased risk of babies being born SGA but little direct evidence of any  
17 other detrimental effect for maternal drinking up to 32g/week. However, there have been few  
18 well-conducted studies examining this specific category of exposure. This issue remains of  
19 great public health importance, with alcohol consumption during pregnancy prevalent in the  
20 UK, Ireland, New Zealand and Australia with up to 80% of women consuming some alcohol  
21 during pregnancy.[59] For some, the evidence of the potential for harm – mostly coming from  
22 animal experiments and human studies of effects due to higher levels of exposure will be  
23 sufficient to advocate that guidelines should advise women to avoid all alcohol in pregnancy,  
24 while others will wish to retain the existing wording of guidelines.[60] Here we found that  
25 maternal alcohol consumption of up to 32g/week was associated with an 10% increased risk  
26 of preterm birth (95%CI: 0·95 to1·28). In comparison, light to moderate smoking (<20  
27 cigarettes per day) is associated with a 22% increased risk of preterm birth (95% CI: 1·13 to  
28 1·32).[61]  
29

30  
31 In conclusion, we found limited evidence for a causal role of light drinking in pregnancy,  
32 compared to abstaining, on most of the outcomes examined. Despite the distinction between  
33 light drinking and abstinence being the point of most tension and confusion for health  
34 professionals and pregnant women and contributing to inconsistent guidance and advice  
35  
36  
37  
38  
39  
40  
41  
42  
43  
44  
45  
46  
47  
48  
49  
50  
51  
52  
53  
54  
55  
56  
57  
58  
59  
60

1  
2  
3 now and in the past, our extensive review shows that this specific question is not being  
4 researched thoroughly enough, if at all. In addition, there has been no evidence regarding  
5 possible benefits of light alcohol consumption versus absence. Further studies, including  
6 those using designs that improve causal inference, are required to provide further evidence  
7 and a better estimation of the likely effects. Formulating guidance on the basis of the current  
8 evidence is challenging. However, describing the paucity of current research and explaining  
9 that “absence of evidence is not evidence of absence”, appears warranted.  
10  
11  
12  
13  
14  
15  
16  
17  
18  
19  
20  
21  
22  
23  
24  
25  
26  
27  
28  
29  
30  
31  
32  
33  
34  
35  
36  
37  
38  
39  
40  
41  
42  
43  
44  
45  
46  
47  
48  
49  
50  
51  
52  
53  
54  
55  
56  
57  
58  
59  
60



## Acknowledgments

We thank our colleagues from NIHR CLAHRC West who provided support that greatly assisted the research. We thank Louise Waters for assistance with article collection and Alison Richards for developing the search strategy for this review.

## Details of contributors

Loubaba Mamluk: Drafting the protocol, preparing the data extraction database, data screening and collection (lead reviewer), data analysis, figures, tables, data interpretation, and drafting the manuscript. Hannah B Edwards: screening, data collection, data quality checking, data interpretation, and preparation of final manuscript. Theresa HM Moore: Advising on the protocol, preparing the protocol, screening title and abstract. Timothy Jones: Data extraction and full text screening. Sharea Ijaz: Abstract and full text screening. Jelena Savović: protocol development/study design (including the development of searching, article screening and data collection strategies), oversaw and managed the review process and the review team, provided methodological advice for the review and meta-analysis conduct, and critically revised the manuscript. George Davey Smith: Obtained funding, formulation of project plan, review of progress and of the manuscript. Jenny L. Donovan: Obtained funding and contributed to drafting the manuscript, and approved the final version. Verity Leach: Data extraction. Deborah Lawlor: contributed to the study design, data interpretation and review of earlier manuscript drafts; she approved the final version that has been submitted. Sarah J. Lewis: contributed to the study design, data interpretation and review of earlier manuscript drafts; she approved the final version that has been submitted. Abigail Fraser: Contributed to the study design, data analysis and interpretation and drafting of manuscript. Luisa Zuccolo: Contributed to the study design, data analysis and interpretation and drafting of manuscript. I, Loubaba Mamluk, the corresponding author of this manuscript, certify that I have full access to all the data in the study and had final responsibility for the decision to submit for publication.

## Transparency declaration

I, Loubaba Mamluk, the corresponding author of this manuscript, affirm that this manuscript is an honest, accurate, and transparent account of the study being reported; that no important aspects of the study have been omitted; and that any discrepancies from the study as planned (and, if relevant, registered) have been explained.

## Conflict of interest:

The authors have nothing to disclose.

1  
2  
3 This work has not been submitted for publication elsewhere.  
4  
5

### 6 **Disclosure**

7 All authors have completed the ICMJE uniform disclosure form  
8 at [www.icmje.org/coi\\_disclosure.pdf](http://www.icmje.org/coi_disclosure.pdf) and declare: no support from any organisation for the  
9 submitted work; no financial relationships with any organisations that might have an interest  
10 in the submitted work in the previous three years; no other relationships or activities that  
11 could appear to have influenced the submitted work.  
12  
13  
14  
15

### 16 **Role of funding source**

17 The UK Medical Research Council (MC\_UU\_12013/1 and MC\_UU\_12013/5) and the  
18 University of Bristol provide core funding for the MRC Integrative Epidemiology Unit; LM,  
19 DAL, GDS, AF, and LZ are partially or fully funded through this. AF and LZ are UK Medical  
20 Research Council research fellowships (Grant refs: MR/M009351/1 and G0902144,  
21 respectively). LM, JS, HE, VL, TJ, SI, TM and JLD are fully or partially partly funded by  
22 National Institute for Health Research (NIHR) Collaboration for Leadership in Applied Health  
23 Research and Care West (CLAHRC West) at University Hospitals Bristol NHS Foundation  
24 Trust. DAL (NF-SI-0611-10196) and JLD (NF-SI-0512-10119) are NIHR Senior  
25 Investigators. SL is a senior lecturer funded by HEFCE. The views expressed here are those  
26 of the author(s) and not necessarily those of the NHS, the MRC, NIHR or the Department of  
27 Health. I, Loubaba Mamluk, the corresponding author of this manuscript, certify that I have  
28 full access to all the data in the study and had final responsibility for the decision to submit  
29 for publication.  
30  
31  
32  
33  
34  
35  
36  
37  
38  
39

### 40 **Transparency declaration**

41 The lead author (Loubaba Mamluk) affirms that this manuscript is an honest, accurate, and  
42 transparent account of the study being reported; that no important aspects of the study have  
43 been omitted; and that any discrepancies from the study as planned (and, if relevant,  
44 registered) have been explained.  
45  
46  
47

### 48 **Data sharing Statement**

49 NA  
50  
51  
52  
53  
54  
55  
56  
57  
58  
59  
60

## References

1. Streissguth AP, Landesman-Dwyer S, Martin JC, Smith DW. Teratogenic effects of alcohol in humans and laboratory animals. *Science (New York, N.Y.)* 1980;**209**(4454):353-61
2. Popova S, Lange S, Shield K, et al. Comorbidity of fetal alcohol spectrum disorder: a systematic review and meta-analysis. *Lancet (London, England)* 2016;**387**(10022):978-87 doi: 10.1016/s0140-6736(15)01345-8[published Online First: Epub Date]].
3. Chudley AE, Conry J, Cook JL, Loock C, Rosales T, LeBlanc N. Fetal alcohol spectrum disorder: Canadian guidelines for diagnosis. *CMAJ : Canadian Medical Association journal = journal de l'Association medicale canadienne* 2005;**172**(5 Suppl):S1-s21 doi: 10.1503/cmaj.1040302[published Online First: Epub Date]].
4. International Alliance for Responsible Drinking- Drinking guidelines for pregnancy and breast feeding. 2016
5. (NICE) NIFHACE. Antenatal care. CG62. NICE 2008
6. Department of Health. Alcohol Guidelines Review – Report from the Guidelines development group to the UK Chief Medical Officers. 2016
7. Moher D, Liberati A, Tetzlaff J, Altman DG. Preferred reporting items for systematic reviews and meta-analyses: the PRISMA statement. *Annals of internal medicine* 2009;**151**(4):264-69
8. Hamlyn B OK, Wands S. *Infant Feeding 2000*. London: The Stationery Office, 2002.
9. Henderson J, Gray R, Brocklehurst P. Systematic review of effects of low–moderate prenatal alcohol exposure on pregnancy outcome. *Bjog* 2007;**114**(3):243-52
10. Patra J, Bakker R, Irving H, Jaddoe VW, Malini S, Rehm J. Dose–response relationship between alcohol consumption before and during pregnancy and the risks of low birthweight, preterm birth and small for gestational age (SGA)—a systematic review and meta-analyses. *Bjog* 2011;**118**(12):1411-21
11. Dissemination CfRa. CRD’s guidance for undertaking reviews in health care. York Publishing Services Ltd 2009:32
12. Becker HC, Diaz-Granados JL, Randall CL. Teratogenic actions of ethanol in the mouse: a minireview. *Pharmacology Biochemistry and Behavior* 1996;**55**(4):501-13
13. Haycock PC. Fetal Alcohol Spectrum Disorders: The Epigenetic Perspective 1. *Biology of reproduction* 2009;**81**(4):607-17
14. Higgins J, Green S. *Cochrane handbook for systematic reviews of interventions version 5.1.0* [updated Mar 2011]. The Cochrane collaboration. 2011, 2012.
15. Wells G, Shea B, O'Connell D, et al. The Newcastle-Ottawa Scale (NOS) for assessing the quality of nonrandomised studies in meta-analyses. [http://www.ohri.ca/programs/clinical\\_epidemiology/oxford.asp](http://www.ohri.ca/programs/clinical_epidemiology/oxford.asp). Accessed March 2017
16. Moher D, Liberati A, Tetzlaff J, Altman DG. Preferred reporting items for systematic reviews and meta-analyses: the PRISMA statement. *PLoS medicine* 2009;**6**(7):e1000097 doi: 10.1371/journal.pmed.1000097[published Online First: Epub Date]].
17. Stroup DF, Berlin JA, Morton SC, et al. Meta-analysis of observational studies in epidemiology: a proposal for reporting. Meta-analysis Of Observational Studies in Epidemiology (MOOSE) group. *Jama* 2000;**283**(15):2008-12
18. Sterne JA, Sutton AJ, Ioannidis JP, et al. Recommendations for examining and interpreting funnel plot asymmetry in meta-analyses of randomised controlled trials. *Bmj* 2011;**343**:d4002
19. StataCorp. *Stata Statistical Software: release 12*. College Station TSL, 2015.
20. Peacock JL, Bland JM, Anderson HR. Preterm delivery: effects of socioeconomic factors, psychological stress, smoking, alcohol, and caffeine. *Bmj* 1995;**311**(7004):531-5
21. Salihu HM, Kornosky JL, Lynch O, Alio AP, August EM, Marty PJ. Impact of prenatal alcohol consumption on placenta-associated syndromes. *Alcohol* 2011;**45**(1):73-9 doi: <http://dx.doi.org/10.1016/j.alcohol.2010.05.010>[published Online First: Epub Date]].

- 1
  - 2
  - 3
  - 4
  - 5
  - 6
  - 7
  - 8
  - 9
  - 10
  - 11
  - 12
  - 13
  - 14
  - 15
  - 16
  - 17
  - 18
  - 19
  - 20
  - 21
  - 22
  - 23
  - 24
  - 25
  - 26
  - 27
  - 28
  - 29
  - 30
  - 31
  - 32
  - 33
  - 34
  - 35
  - 36
  - 37
  - 38
  - 39
  - 40
  - 41
  - 42
  - 43
  - 44
  - 45
  - 46
  - 47
  - 48
  - 49
  - 50
  - 51
  - 52
  - 53
  - 54
  - 55
  - 56
  - 57
  - 58
  - 59
  - 60
22. Sayal K, Draper ES, Fraser R, Barrow M, Davey Smith G, Gray R. Light drinking in pregnancy and mid-childhood mental health and learning outcomes. *Arch Dis Child* 2013;**98**(2):107-11 doi: <http://dx.doi.org/10.1136/archdischild-2012-302436>[published Online First: Epub Date]].
23. Alati R, Macleod J, Hickman M, et al. Intrauterine exposure to alcohol and tobacco use and childhood IQ: findings from a parental-offspring comparison within the Avon Longitudinal Study of Parents and Children. *Pediatr Res* 2008;**64**(6):659-66 doi: <http://dx.doi.org/10.1203/PDR.0b013e318187cc31>[published Online First: Epub Date]].
24. Lipsitch M, Tchetgen ET, Cohen T. Negative controls: a tool for detecting confounding and bias in observational studies. *Epidemiology (Cambridge, Mass.)* 2010;**21**(3):383
25. Alati R, Davey Smith G, Lewis SJ, et al. Effect of prenatal alcohol exposure on childhood academic outcomes: contrasting maternal and paternal associations in the ALSPAC study. *PLoS ONE* 2013;**8**(10):e74844 doi: <http://dx.doi.org/10.1371/journal.pone.0074844>[published Online First: Epub Date]].
26. Lundsberg LS, Illuzzi JL, Belanger K, Triche EW, Bracken MB. Low-to-moderate prenatal alcohol consumption and the risk of selected birth outcomes: a prospective cohort study. *Ann Epidemiol* 2015;**25**(1):46-54.e3 doi: <http://dx.doi.org/10.1016/j.annepidem.2014.10.011>[published Online First: Epub Date]].
27. Nykjaer C, Alwan NA, Greenwood DC, et al. Maternal alcohol intake prior to and during pregnancy and risk of adverse birth outcomes: evidence from a British cohort. *J Epidemiol Community Health* 2014;**68**(6):542-9 doi: <http://dx.doi.org/10.1136/jech-2013-202934>[published Online First: Epub Date]].
28. Niclasen J, Nybo Andersen AM, Teasdale TW, Strandberg-Larsen K. Prenatal exposure to alcohol, and gender differences on child mental health at age seven years. *J Epidemiol Community Health* 2014;**68**(3):224-32 doi: <http://dx.doi.org/10.1136/jech-2013-202956>[published Online First: Epub Date]].
29. Miyake Y, Tanaka K, Okubo H, Sasaki S, Arakawa M. Alcohol consumption during pregnancy and birth outcomes: the Kyushu Okinawa Maternal and Child Health Study. *BMC Pregnancy Childbirth* 2014;**14**:79 doi: <http://dx.doi.org/10.1186/1471-2393-14-79>[published Online First: Epub Date]].
30. McCarthy FP, O'Keeffe LM, Khashan AS, et al. Association between maternal alcohol consumption in early pregnancy and pregnancy outcomes. *Obstetrics & Gynecology* 2013;**122**(4):830-37
31. Robinson M, Oddy WH, McLean NJ, et al. Low-moderate prenatal alcohol exposure and risk to child behavioural development: a prospective cohort study. *Bjog* 2010;**117**(9):1139-50 doi: <http://dx.doi.org/10.1111/j.1471-0528.2010.02596.x>[published Online First: Epub Date]].
32. Jaddoe VW, Bakker R, Hofman A, et al. Moderate alcohol consumption during pregnancy and the risk of low birth weight and preterm birth. The generation R study. *Ann Epidemiol* 2007;**17**(10):834-40
33. Sayal K, Heron J, Golding J, Emond A. Prenatal alcohol exposure and gender differences in childhood mental health problems: a longitudinal population-based study. *Pediatrics* 2007;**119**(2):e426-34
34. Albertsen K, Andersen AM, Olsen J, Gronbaek M. Alcohol consumption during pregnancy and the risk of preterm delivery. *Am J Epidemiol* 2004;**159**(2):155-61
35. Lundsberg LS, Bracken MB, Saftlas AF. Low-to-moderate gestational alcohol use and intrauterine growth retardation, low birthweight, and preterm delivery. *Ann Epidemiol* 1997;**7**(7):498-508
36. Passaro KT, Little RE, Savitz DA, Noss J. The effect of maternal drinking before conception and in early pregnancy on infant birthweight. The ALSPAC Study Team. *Avon Longitudinal Study of Pregnancy and Childhood. Epidemiology* 1996;**7**(4):377-83

- 1  
2  
3 37. Shu XO, Hatch MC, Mills J, Clemens J, Susser M. Maternal smoking, alcohol drinking, caffeine  
4 consumption, and fetal growth: results from a prospective study. *Epidemiology*  
5 1995;**6**(2):115-20  
6  
7 38. Olsen J, Pereira AdC, Olsen SF. Does maternal tobacco smoking modify the effect of alcohol on  
8 fetal growth? *American journal of public health* 1991;**81**(1):69-73  
9  
10 39. Brooke OG, Anderson HR, Bland JM, Peacock JL, Stewart CM. Effects on birth weight of smoking,  
11 alcohol, caffeine, socioeconomic factors, and psychosocial stress. *Bmj* 1989;**298**(6676):795-  
12 801  
13  
14 40. Andersen A-MN, Andersen PK, Olsen J, Grønbaek M, Strandberg-Larsen K. Moderate alcohol  
15 intake during pregnancy and risk of fetal death. *Int J Epidemiol* 2012;**41**(2):405-13  
16  
17 41. Windham GC, Von Behren J, Fenster L, Schaefer C, Swan SH. Moderate maternal alcohol  
18 consumption and risk of spontaneous abortion. *Epidemiology* 1997;**8**(5):509-14  
19  
20 42. Ogston SA, Parry GJ. EUROMAC. A European concerted action: maternal alcohol consumption  
21 and its relation to the outcome of pregnancy and child development at 18 months. Results--  
22 strategy of analysis and analysis of pregnancy outcome. *Int J Epidemiol* 1992;**21 Suppl 1**:S45-  
23 71  
24  
25 43. Bille C, Olsen J, Vach W, et al. Oral clefts and life style factors--a case-cohort study based on  
26 prospective Danish data. *Eur J Epidemiol* 2007;**22**(3):173-81  
27  
28 44. Ernhart CB, Sokol RJ, Ager JW, Morrow-Tlucak M, Martier S. Alcohol-related birth defects:  
29 assessing the risk. *Ann N Y Acad Sci* 1989;**562**:159-72  
30  
31 45. Faebo Larsen R, Hvas Mortensen L, Martinussen T, Nybo Andersen AM. Determinants of  
32 developmental coordination disorder in 7-year-old children: a study of children in the Danish  
33 National Birth Cohort. *Dev Med Child Neurol* 2013;**55**(11):1016-22 doi:  
34 <http://dx.doi.org/10.1111/dmcn.12223>[published Online First: Epub Date]].  
35  
36 46. Parry GJ, Ogston SA. EUROMAC. A European concerted action: maternal alcohol consumption  
37 and its relation to the outcome of pregnancy and child development at 18 months. Results--  
38 child development at age 18 months. *Int J Epidemiol* 1992;**21 Suppl 1**:S72-8  
39  
40 47. NHS Choices.Can I drink alcohol if I'm pregnant?  
41 [www.nhs.uk/chq/Pages/2270.aspx?CategoryID=54#close](http://www.nhs.uk/chq/Pages/2270.aspx?CategoryID=54#close). 2014  
42  
43 48. Galobardes B, Shaw M, Lawlor DA, Lynch JW, Smith GD. Indicators of socioeconomic position  
44 (part 1). *Journal of epidemiology and community health* 2006;**60**(1):7-12  
45  
46 49. Kelly Y, Sacker A, Gray R, Kelly J, Wolke D, Quigley MA. Light drinking in pregnancy, a risk for  
47 behavioural problems and cognitive deficits at 3 years of age? *Int J Epidemiol*  
48 2009;**38**(1):129-40 doi: <http://dx.doi.org/10.1093/ije/dyn230>[published  
49 Online First: Epub  
50 Date]].  
51  
52 50. Bradley RH, Corwyn RF. Socioeconomic status and child development. *Annual review of*  
53 *psychology* 2002;**53**(1):371-99  
54  
55 51. Phung H, Bauman A, Nguyen T, Young L, Tran M, Hillman K. Risk factors for low birth weight in a  
56 socio-economically disadvantaged population: parity, marital status, ethnicity and cigarette  
57 smoking. *Eur J Epidemiol* 2003;**18**(3):235-43  
58  
59 52. Morrison A, Polisena J, Husereau D, et al. The effect of English-language restriction on systematic  
60 review-based meta-analyses: a systematic review of empirical studies. *International journal of  
technology assessment in health care* 2012;**28**(02):138-44  
61  
62 53. Moher D, Pham B, Lawson M, Klassen T. The inclusion of reports of randomised trials published  
63 in languages other than English in systematic reviews. *Health Technol Assess* 2003;**7**(41):1-  
64 90  
65  
66 54. Klassen TP, Lawson ML, Moher D. Language of publication restrictions in systematic reviews gave  
67 different results depending on whether the intervention was conventional or  
68 complementary. *Journal of clinical epidemiology* 2005;**58**(8):769-76. e2  
69  
70 55. Jüni P, Holenstein F, Sterne J, Bartlett C, Egger M. Direction and impact of language bias in meta-  
71 analyses of controlled trials: empirical study. *Int J Epidemiol* 2002;**31**(1):115-23

- 1  
2  
3 56. Richmond RC, Al-Amin A, Smith GD, Relton CL. Approaches for drawing causal inferences from  
4 epidemiological birth cohorts: a review. *Early human development* 2014;**90**(11):769-80 doi:  
5 10.1016/j.earlhumdev.2014.08.023[published Online First: Epub Date]].  
6  
7 57. Burgess S, Davies NM, Thompson SG. Instrumental variable analysis with a nonlinear exposure-  
8 outcome relationship. *Epidemiology* 2014;**25**(6):877-85 doi:  
9 10.1097/ede.000000000000161[published Online First: Epub Date]].  
10  
11 58. Ades A, Sutton A. Multiparameter evidence synthesis in epidemiology and medical decision-  
12 making: current approaches. *Journal of the Royal Statistical Society: Series A (Statistics in*  
13 *Society)* 2006;**169**(1):5-35  
14  
15 59. O'Keeffe LM, Kearney PM, McCarthy FP, et al. Prevalence and predictors of alcohol use during  
16 pregnancy: findings from international multicentre cohort studies. *BMJ open*  
17 2015;**5**(7):e006323  
18  
19 60. Mather M, Wiles K, O'Brien P. Should women abstain from alcohol throughout pregnancy? 2015  
20  
21  
22  
23  
24  
25  
26  
27  
28  
29  
30  
31  
32  
33  
34  
35  
36  
37  
38  
39  
40  
41  
42  
43  
44  
45  
46  
47  
48  
49  
50  
51  
52  
53  
54  
55  
56  
57  
58  
59  
60

peer review only



1  
2  
3 **Figure 1.** Flowchart of search strategy including primary reasons for article exclusion.  
4

5 **Figure 2.** Pooled mean difference for birthweight comparing low alcohol consumption (up to  
6 32g/week) with no alcohol consumption (7 studies). 'Adjusted' refers to adjusted for both smoking  
7 and a measure of socio-economic status. CI: Confidence intervals.  
8

9 **Figure 3a)** Odd Ratios for preterm birth comparing low alcohol consumption (up to 32g/week) with  
10 no alcohol consumption (9 studies); **3b)** Odd Ratios for small for gestational age comparing low  
11 alcohol consumption (up to 32g/week) with no alcohol consumption (7 studies) **3c)** Odd Ratios for  
12 low birthweight comparing low alcohol consumption (up to 32g/week) with no alcohol consumption  
13 (6 studies). OR: Odds ratio, CI: Confidence intervals. Pooled OR includes both adjusted and  
14 unadjusted estimates from studies, 'Adjusted' refers to adjusted for both smoking and a measure of  
15 socio-economic status.  
16  
17  
18

19 **Supplementary figure 1a)** Odds ratios for externalising behaviour comparing low alcohol  
20 consumption (up to 32g/week) with no alcohol consumption (3 studies); **1b)** Odds ratios for  
21 internalising behaviour comparing low alcohol consumption (up to 32g/week) with no alcohol  
22 consumption (2 studies); OR: Odds ratio, CI: Confidence intervals.  
23  
24  
25  
26  
27  
28  
29  
30  
31  
32  
33  
34  
35  
36  
37  
38  
39  
40  
41  
42  
43  
44  
45  
46  
47  
48  
49  
50  
51  
52  
53  
54  
55  
56  
57  
58  
59  
60

1  
2  
3  
4  
5  
6  
7  
8  
9  
10  
11  
12  
13  
14  
15  
16  
17  
18  
19  
20  
21  
22  
23  
24  
25  
26  
27  
28  
29  
30  
31  
32  
33  
34  
35  
36  
37  
38  
39  
40  
41  
42  
43  
44  
45  
46  
47  
48  
49  
50  
51  
52  
53  
54  
55  
56  
57  
58  
59  
60

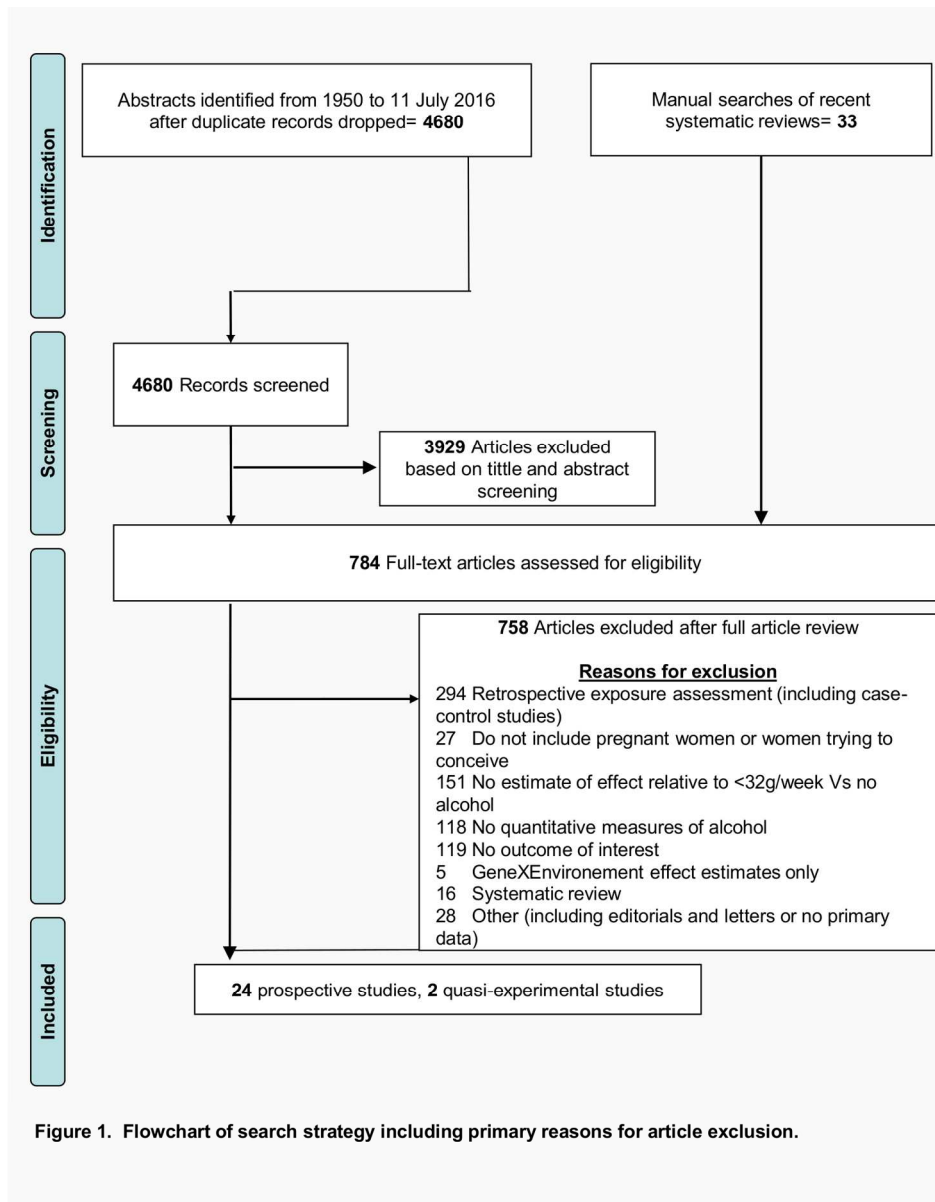

Figure 1. Flowchart of search strategy including primary reasons for article exclusion.

Figure 1. Flowchart of search strategy including primary reasons for article exclusion.

143x183mm (300 x 300 DPI)



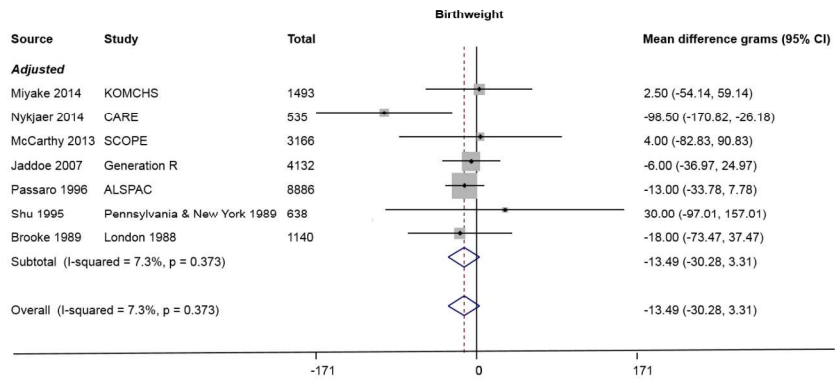

Figure 2. Pooled mean difference for birthweight comparing low alcohol consumption (up to 32g/week) with no alcohol consumption (7 studies). 'Adjusted' refers to adjusted for both smoking and a measure of socio-economic status. CI: Confidence intervals.

Figure 2. Pooled mean difference for birthweight comparing low alcohol consumption (up to 32g/week) with no alcohol consumption (7 studies). 'Adjusted' refers to adjusted for both smoking and a measure of socio-economic status. CI: Confidence intervals.

297x209mm (300 x 300 DPI)

ew only

1  
2  
3  
4  
5  
6  
7  
8  
9  
10  
11  
12  
13  
14  
15  
16  
17  
18  
19  
20  
21  
22  
23  
24  
25  
26  
27  
28  
29  
30  
31  
32  
33  
34  
35  
36  
37  
38  
39  
40  
41  
42  
43  
44  
45  
46  
47  
48  
49  
50  
51  
52  
53  
54  
55  
56  
57  
58  
59  
60

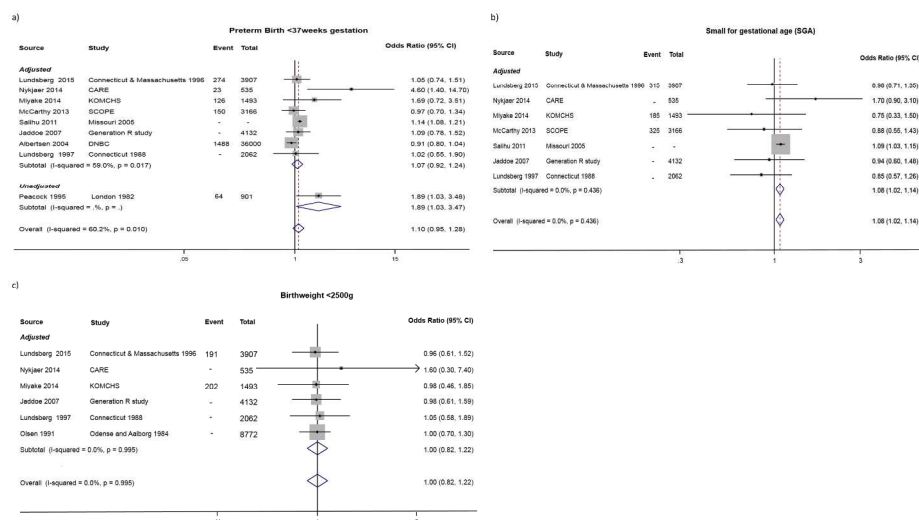

Figure 3a) Odd Ratios for preterm birth comparing low alcohol consumption (up to 32g/week) with no alcohol consumption (9 studies); 3b) Odd Ratios for small for gestational age comparing low alcohol consumption (up to 32g/week) with no alcohol consumption (7 studies) 3c) Odd Ratios for low birthweight comparing low alcohol consumption (up to 32g/week) with no alcohol consumption (6 studies). OR: Odds ratio, CI: Confidence intervals. Pooled OR includes both adjusted and unadjusted estimates from studies, 'Adjusted' refers to adjusted for both smoking and a measure of socio-economic status.

Figure 3a) Odd Ratios for preterm birth comparing low alcohol consumption (up to 32g/week) with no alcohol consumption (9 studies); 3b) Odd Ratios for small for gestational age comparing low alcohol consumption (up to 32g/week) with no alcohol consumption (7 studies) 3c) Odd Ratios for low birthweight comparing low alcohol consumption (up to 32g/week) with no alcohol consumption (6 studies). OR: Odds ratio, CI: Confidence intervals. Pooled OR includes both adjusted and unadjusted estimates from studies, 'Adjusted' refers to adjusted for both smoking and a measure of socio-economic status.

297x209mm (300 x 300 DPI)

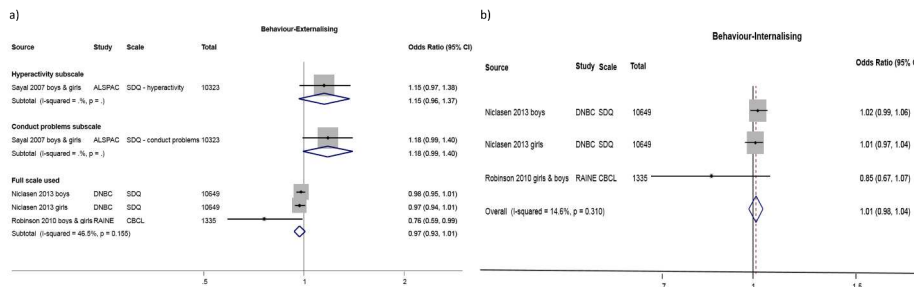

Supplementary figure 1a) Odds ratios for externalising behaviour comparing low alcohol consumption (up to 32g/week) with no alcohol consumption (3 studies); 1b) Odds ratios for internalising behaviour comparing low alcohol consumption (up to 32g/week) with no alcohol consumption (2 studies); OR: Odds ratio, CI: Confidence intervals.

Supplementary figure 1a) Odds ratios for externalising behaviour comparing low alcohol consumption (up to 32g/week) with no alcohol consumption (3 studies); 1b) Odds ratios for internalising behaviour comparing low alcohol consumption (up to 32g/week) with no alcohol consumption (2 studies); OR: Odds ratio, CI: Confidence intervals.

297x209mm (300 x 300 DPI)

**PROSPERO International prospective register of systematic reviews****Systematic review of the effects of low-moderate prenatal alcohol exposure on pregnancy and childhood outcomes***Loubaba Mamluk, Luisa Zuccolo, Theresa Moore, Alison Richards***Citation**

Loubaba Mamluk, Luisa Zuccolo, Theresa Moore, Alison Richards. Systematic review of the effects of low-moderate prenatal alcohol exposure on pregnancy and childhood outcomes. PROSPERO 2015:CRD42015015941 Available from [http://www.crd.york.ac.uk/PROSPERO\\_REBRANDING/display\\_record.asp?ID=CRD42015015941](http://www.crd.york.ac.uk/PROSPERO_REBRANDING/display_record.asp?ID=CRD42015015941)

**Review question(s)**

To determine what is known about the effects of prenatal alcohol exposure, corresponding to low-to-moderate levels of maternal consumption, on pregnancy outcomes. These include pregnancy complications, delivery outcomes and Fetal Alcohol Syndrome (FAS) features. This will include the assessment of systematic reviews and meta-analyses. A particular focus will be placed on identifying practical and meaningful outcomes of alcohol toxicity during pregnancy.

**Searches**

Publications will be identified by searching the following major relevant databases: Medline, Embase, web of science and Psychinfo. All databases will be searched from inception. Internet searches will be carried out using Google Scholar. Attempts to identify further studies will be made by examining the reference lists of included studies and of previous reviews. All studies to be restricted to those published in the English language only.

**Types of study to be included**

1) Prospective studies and systematic reviews/meta-analyses of prospective studies (cohort or case-control studies nested in a cohort). 2) Natural experiments / studies using instrumental variables to improve casual inference, including Mendelian Randomization (MR) studies 3) Sibling comparison studies 4) Parental comparisons

**Condition or domain being studied**

Pregnancy and delivery outcomes as well as offspring outcomes (from the domains affected by Fetal Alcohol Syndrome (FAS))

**Participants/ population**

Pregnant women or women who are trying to become pregnant sampled from the general population. Cohorts of pregnant women with alcohol abuse/dependency will be excluded.

**Intervention(s), exposure(s)**

Inclusion: low-to-moderate levels of prenatal alcohol consumption (up to 10.4 UK units or 83 g/week).

Exclusion: studies will be excluded if there was no quantitative measure of alcohol consumption that could be converted to UK standard units or grams of alcohol and if there was insufficient data for an (adjusted and/or crude) effect measure of low-moderate consumption to be extracted. Cohorts of pregnant women with alcohol abuse/dependency will be excluded.

**Comparator(s)/ control**

women with no or very sporadic alcohol consumption in pregnancy.

**Outcome(s)****Primary outcomes**

Outcomes: (in both children and adults)

1  
2  
3 1) Pregnancy complications

- 4  
5 - Intra uterine growth restrictions (IUGR)  
6  
7 - Miscarriage  
8  
9 - Premature labour and birth- Gestational age  
10  
11 - Preeclampsia and gestational hypertension  
12  
13 - Low amniotic fluid (oligohydramnios)  
14  
15 - Gestational diabetes  
16  
17 - Placenta previa

18  
19 2) Delivery outcomes

- 20  
21 - Birth weight/ low birth weight/ small for gestational age (SGA)  
22  
23 - Still birth  
24  
25 - Delivery intervention (including vacuum extraction, forceps delivery,  
26  
27 Caesarean section)  
28  
29 - Apgar score

30  
31 3) FAS features

- 32  
33 - Facial malformation  
34  
35 - Growth restrictions (height- measurements of growth restriction)  
36  
37 - Cranium size/ head circumference  
38  
39 - Developmental delays  
40  
41 - Behaviour complications  
42  
43 - Cognitive impairment / IQ  
44  
45 - Attention scores / Attention deficit and hyperactivity disorder (ADHD)

46 **Secondary outcomes**

47 none

48 **Data extraction, (selection and coding)**

49 Selection of studies:

50  
51  
52 Titles and abstracts will be screened independently by one reviewer (a random selection of 20% will also be screened  
53 by a second reviewer independently) with inclusion/exclusion being decided according to prespecified criteria.  
54 Discrepancies will be discussed and disagreements resolved through consensus. The full-text of each of the articles  
55 identified through screening of titles and abstracts will be obtained in order to determine their inclusion in the review.  
56

57  
58 Data extraction:  
59  
60

Data extraction will be carried out using Microsoft Access. This will be piloted on a small selection of studies and adjusted as necessary. Relevant data will be documented from each identified study including information on study design and location, population characteristics, exposures studied (including timing of exposure), methods used to ascertain exposures, outcomes studied, method of outcome ascertainment (including person reporting the outcome, whether parent, teacher, health professional, researcher, child...), study results (from both unadjusted and fully adjusted regressions), statistical adjustments etc. Data extraction will be carried out independently by one reviewer and a random selection of 20% will be checked by a second reviewer. Discrepancies will be resolved through discussion or referral to a third reviewer. Where necessary, authors will be contacted for additional information.

### **Risk of bias (quality) assessment**

Studies that did not adjust for smoking and maternal education/social class as potential confounders in their final model will be considered to be of low evidence quality.

### **Strategy for data synthesis**

The impact of low-to-moderate alcohol use on pregnancy and related outcomes will be investigated using high-low methods of meta-analysis techniques; however, due to anticipated low number of studies for some outcomes, a formal meta-analysis may not be appropriate for some of the outcomes. Where meta-analysis is not possible, a narrative summary of findings will be carried out. Random-effect meta-analysis will be performed alongside fixed-effect in the presence of high levels of between-studies heterogeneity (measured through I<sup>2</sup>). Item response theory (IRT) will be used to combining results from different scales if required. The likelihood of small study bias deriving from publication bias will further be assessed through drawing funnel plots.

### **Analysis of subgroups or subsets**

Where the included number of studies in the meta-analysis is large enough, sub-group analyses will be performed for 1) studies adjusting for smoking and maternal education/social class; 2) studies reporting separately on the effects of alcohol use in different gestational periods; 3) studies using different exposure/outcome assessments.

### **Dissemination plans**

We anticipate dissemination to regional and national public health directors

### **Contact details for further information**

Dr Mamluk

MRC Integrative Epidemiology Unit

School of Social and Community Medicine

University of Bristol

Oakfield House

Oakfield Grove

Bristol BS8 2BN

United Kingdom

l.mamluk@bristol.ac.uk

### **Organisational affiliation of the review**

none

### **Review team**

Dr Loubaba Mamluk, University of Bristol, UK

Dr Luisa Zuccolo, University of Bristol, UK

Ms Theresa Moore, University of Bristol, UK

Ms Alison Richards, University of Bristol, UK

### Collaborators

Dr Luisa Zuccolo, University of Bristol, UK  
Dr Sarah Lewis, University of Bristol, UK  
Dr Abi Fraser, University of Bristol, UK  
Professor Jenny Donovan, University of Bristol, UK  
Professor George Davey Smith, University of Bristol, UK

### Anticipated or actual start date

12 January 2015

### Anticipated completion date

01 September 2015

### Funding sources/sponsors

National Institute of Health Research, Medical Research Council, University of Bristol. UK

### Conflicts of interest

None known

### Language

English

### Country

England

### Subject index terms status

Subject indexing assigned by CRD

### Subject index terms

Alcohol Drinking; Humans; Pregnancy Outcome; Prenatal Exposure Delayed Effects

### Stage of review

Ongoing

### Date of registration in PROSPERO

19 January 2015

### Date of publication of this revision

25 February 2015

### DOI

10.15124/CRD42015015941

### Stage of review at time of this submission

|                                                                 | Started | Completed |
|-----------------------------------------------------------------|---------|-----------|
| Preliminary searches                                            | No      | Yes       |
| Piloting of the study selection process                         | No      | Yes       |
| Formal screening of search results against eligibility criteria | No      | No        |
| Data extraction                                                 | No      | No        |
| Risk of bias (quality) assessment                               | No      | No        |
| Data analysis                                                   | No      | No        |

1  
2  
3  
4  
5  
6  
7  
8  
9  
10  
11  
12  
13  
14  
15  
16  
17  
18  
19  
20  
21  
22  
23  
24  
25  
26  
27  
28  
29  
30  
31  
32  
33  
34  
35  
36  
37  
38  
39  
40  
41  
42  
43  
44  
45  
46  
47  
48  
49  
50  
51  
52  
53  
54  
55  
56  
57  
58  
59  
60

**PROSPERO**

**International prospective register of systematic reviews**

The information in this record has been provided by the named contact for this review. CRD has accepted this information in good faith and registered the review in PROSPERO. CRD bears no responsibility or liability for the content of this registration record, any associated files or external websites.

---

For peer review only



### MOOSE Checklist for Meta-analyses of Observational Studies

| Item No                                     | Recommendation                                                                                             | Reported on Page No   |
|---------------------------------------------|------------------------------------------------------------------------------------------------------------|-----------------------|
| Reporting of background should include      |                                                                                                            |                       |
| 1                                           | Problem definition                                                                                         | 1                     |
| 2                                           | Hypothesis statement                                                                                       | 4                     |
| 3                                           | Description of study outcome(s)                                                                            | 6&7                   |
| 4                                           | Type of exposure or intervention used                                                                      | 6                     |
| 5                                           | Type of study designs used                                                                                 | 6                     |
| 6                                           | Study population                                                                                           | 7                     |
| Reporting of search strategy should include |                                                                                                            |                       |
| 7                                           | Qualifications of searchers (eg, librarians and investigators)                                             | 7                     |
| 8                                           | Search strategy, including time period included in the synthesis and key words                             | supplementary table 1 |
| 9                                           | Effort to include all available studies, including contact with authors                                    | 7                     |
| 10                                          | Databases and registries searched                                                                          | 7                     |
| 11                                          | Search software used, name and version, including special features used (eg, explosion)                    | supplementary table 1 |
| 12                                          | Use of hand searching (eg, reference lists of obtained articles)                                           | 7                     |
| 13                                          | List of citations located and those excluded, including justification                                      | Figure 1              |
| 14                                          | Method of addressing articles published in languages other than English                                    | 13                    |
| 15                                          | Method of handling abstracts and unpublished studies                                                       | 6                     |
| 16                                          | Description of any contact with authors                                                                    | 6                     |
| Reporting of methods should include         |                                                                                                            |                       |
| 17                                          | Description of relevance or appropriateness of studies assembled for assessing the hypothesis to be tested | 6                     |

|                                     |                                                                                                                                                                                                                                                                              |                           |
|-------------------------------------|------------------------------------------------------------------------------------------------------------------------------------------------------------------------------------------------------------------------------------------------------------------------------|---------------------------|
| 18                                  | Rationale for the selection and coding of data (eg, sound clinical principles or convenience)                                                                                                                                                                                | 7                         |
| 19                                  | Documentation of how data were classified and coded (eg, multiple raters, blinding and interrater reliability)                                                                                                                                                               | 7&8                       |
| 20                                  | Assessment of confounding (eg, comparability of cases and controls in studies where appropriate)                                                                                                                                                                             | supplementary table 2 & 8 |
| 21                                  | Assessment of study quality, including blinding of quality assessors, stratification or regression on possible predictors of study results                                                                                                                                   | 8                         |
| 22                                  | Assessment of heterogeneity                                                                                                                                                                                                                                                  | Figures 2&3               |
| 23                                  | Description of statistical methods (eg, complete description of fixed or random effects models, justification of whether the chosen models account for predictors of study results, dose-response models, or cumulative meta-analysis) in sufficient detail to be replicated | 9&10                      |
| 24                                  | Provision of appropriate tables and graphics                                                                                                                                                                                                                                 | 27-36                     |
| Reporting of results should include |                                                                                                                                                                                                                                                                              |                           |
| 25                                  | Graphic summarizing individual study estimates and overall estimate                                                                                                                                                                                                          | Figures 2&3               |
| 26                                  | Table giving descriptive information for each study included                                                                                                                                                                                                                 | Table 1-3                 |
| 27                                  | Results of sensitivity testing (eg, subgroup analysis)                                                                                                                                                                                                                       | Figures 2&3               |
| 28                                  | Indication of statistical uncertainty of findings                                                                                                                                                                                                                            | 19                        |

**Supplementary Table 1.** Search Strategy 1950 to 11-07-2016. MEDLINE, PsycINFO, EMBASE on Ovid; the Cochrane Library including CENTRAL (the Cochrane Central Database of Controlled Trials) on Wiley Interscience; and Science Citation Index, Social Science Citation Index, on Web of Science.

- 1 exp pregnancy/ (719661)
- 2 Pregnant Women/ (5199)
- 3 preconception care/ or prenatal care/ (21644)
- 4 exp "embryonic and fetal development"/ (212127)
- 5 Fetus/ (68424)
- 6 exp Pregnancy Complications/ (343999)
- 7 (prepregnan\$ or conception or preconception or pregnan\$ or prenatal\$ or pre-natal\$ or f?etal or f?etus or in utero).ti,ab. (588557)
- 8 Maternal exposure/ (5534)
- 9 or/1-8 (1079283)
- 10 Ethanol/ (73449)
- 11 Alcohol dehydrogenase/ (5809)
- 12 Aldehyde Oxidoreductases/ (3672)
- 13 exp Drinking Behavior/ (57821)
- 14 Temperance/ (2430)
- 15 alcohol\$.ti. (106954)
- 16 (alcohol dehydrogenase or acetaldehyde dehydrogenase).ti,ab. (8557)
- 17 ((alcohol or alcoholic) adj3 (drink\$ or exposure or consumption or consume\$ or consuming or low or light or moderat\$ or abstin\$ or abstain\$)).ti,ab. (49470)
- 18 ((low or light or moderate or abstin\$ or abstain\$ or pattern\$ or behavior\$) adj3 drink\$).ti,ab. (10558)
- 19 (ADH1B\$ or teetotal\$ or temperance or nondrink\$ or non-drink\$).ti,ab. (3093)
- 20 Genome-Wide Association Study/ or Linkage Disequilibrium/ or genotype/ or phenotype/ or polymorphism, genetic/ or (polymorphism\$ or ((gene or genes or genetic or genotyp\$) adj3 (instrument\$ or variant\$ or variable\$ or variability or variabilities or variance\$))).ti,ab. (494904)
- 21 \*Alcohols/ or exp \*Alcohol-Related Disorders/ or (alcohol adj3 (misuse or "use" or abuse or addict\$ or dependence or response\$ or susceptibility)).ti,ab. (110843)
- 22 20 and 21 (3108)
- 23 or/10-19,22 (213050)

1  
2  
3 24 9 and 23 (11403)  
4 25 letter/ (861500)  
5 26 editorial/ (368458)  
6 27 news/ (166329)  
7 28 exp historical article/ (325965)  
8 29 Anecdotes as topic/ (4586)  
9 30 comment/ (610211)  
10 31 case report/ (1708277)  
11 32 (letter or comment\$.ti. (100442)  
12 33 or/25-32 (3417468)  
13 34 randomized controlled trial/ or Randomized Controlled Trials as Topic/ or random\$.ti,ab. (888907)  
14 35 33 not 34 (3386180)  
15 36 animals/ not humans/ (3889478)  
16 37 exp Animals, Laboratory/ (730783)  
17 38 exp Animal Experimentation/ (6477)  
18 39 exp Models, Animal/ not humans/ (310115)  
19 40 exp rodentia/ (2688128)  
20 41 (rat or rats or mouse or mice).ti. (1123907)  
21 42 or/35-41 (7849766)  
22 43 24 not 42 (6498)  
23 44 meta-analysis/ (52850)  
24 45 meta-analysis as topic/ (13933)  
25 46 (meta analy\$ or metaanaly\$ or metanaly\$ or meta regression).ti,ab. (72390)  
26 47 ((systematic\$ or evidence\$ or realist or narrative or literature) adj2 (review\$ or overview\$)).ti,ab.  
27 (171877)  
28 48 "review of reviews".ti,ab. (211)  
29 49 (reference list\$ or bibliograph\$ or hand search\$ or manual search\$ or relevant journals).ab.  
30 (27094)  
31 50 (search strategy or search criteria or systematic search or study selection or data extraction).ab.  
32 (28877)  
33 51 (search\$ adj4 literature).ab. (30686)  
34  
35  
36  
37  
38  
39  
40  
41  
42  
43  
44  
45  
46  
47

1  
2  
3 52 (medline or pubmed or cochrane or embase or psychlit or psyclit or psychinfo or cinahl or science  
4 Citation index or bids or cancerlit).ab. (95294)  
5  
6 53 cochrane.jw. (11053)  
7  
8 54 ((multiple treatment\$ or indirect or mixed) adj2 comparison).ti,ab. (991)  
9  
10 55 or/44-54 (293491)  
11  
12 56 43 and 55 (201)  
13  
14 57 epidemiologic studies/ (6077)  
15  
16 58 ep.fs. (1223653)  
17  
18 59 exp case control studies/ (691899)  
19  
20 60 exp cohort studies/ (1394149)  
21  
22 61 cross-sectional studies/ (185407)  
23  
24 62 Mendelian Randomization Analysis/ (229)  
25  
26 63 (case control or negative control).ti,ab. (93097)  
27  
28 64 (cohort adj (study or studies or analys\$)).ti,ab. (98537)  
29  
30 65 ((follow up or observational) adj (study or studies)).ti,ab. (87771)  
31  
32 66 ((longitudinal\$ or retrospectiv\$ or prospectiv\$) and (study or studies or studied or review\$ or  
33 analys\$ or cohort\$)).ti,ab. (870699)  
34  
35 67 cross sectional.ti,ab. (183479)  
36  
37 68 (mendel\$ or natural experiment\$).ti,ab. (11082)  
38  
39 69 ((family or sibling or population) adj3 (study or studies)).ti,ab. (115245)  
40  
41 70 or/57-69 (2937160)  
42  
43 71 exp guideline/ (25834)  
44  
45 72 guidelines as topic/ or practice guidelines as topic/ (114690)  
46  
47 73 guideline\$.mp. (291621)  
74 or/71-73 (291621)  
75 55 or 70 or 74 (3362878)  
76 43 and 75 (3349)  
77 limit 76 to english language (3096)  
78 ((smok\$ or drug\$ or tobacco or nicotine or cigarette\$ or substance\$ or methamphetamine\$  
or amphetamine\$ or cocaine\$ or heroin or cannabis or marijuana) not (alcohol or alcoholic or drink\$)).ti.  
(489662)

1  
2  
3  
4  
5  
6  
7  
8  
9  
10  
11  
12  
13  
14  
15  
16  
17  
18  
19  
20  
21  
22  
23  
24  
25  
26  
27  
28  
29  
30  
31  
32  
33  
34  
35  
36  
37  
38  
39  
40  
41  
42  
43  
44  
45  
46  
47

79 77 not 78 (2822)

---

For peer review only

| Supplementary Table 2. Lists of confounders adjusted for by each study |                                                                                                                                                                                                                                                                                                                                                                                                                                                                                                                                                                                                                                                                    |
|------------------------------------------------------------------------|--------------------------------------------------------------------------------------------------------------------------------------------------------------------------------------------------------------------------------------------------------------------------------------------------------------------------------------------------------------------------------------------------------------------------------------------------------------------------------------------------------------------------------------------------------------------------------------------------------------------------------------------------------------------|
| Study (year)                                                           | Confounders                                                                                                                                                                                                                                                                                                                                                                                                                                                                                                                                                                                                                                                        |
| [26] Lundsberg (2015)                                                  | Parity, maternal age, education, BMI, marital status, ethnicity, caffeine, smoking, exercise, work, prenatal and multivitamin use, passive smoke exposure, marijuana use, cocaine use, study cohort, preterm labour, respiratory problem, infant gender, bleeding, nausea/vomiting, hypertension, incompetent cervix, placental problems, sexually transmitted disease, induction/augmentation, maternal asthma, gestational diabetes.                                                                                                                                                                                                                             |
| [27] Nykjaer (2014)                                                    | Maternal pre-pregnancy weight, height, age, parity, ethnicity, salivary cotinine levels, caffeine intake, education, energy intake, gestation and baby's sex                                                                                                                                                                                                                                                                                                                                                                                                                                                                                                       |
| [28] Niclasen (2014)                                                   | Parental smoking, parental education, parental pre-pregnancy psychiatric diagnoses, and maternal psychological well-being in pregnancy.                                                                                                                                                                                                                                                                                                                                                                                                                                                                                                                            |
| [29] Miyake (2014)                                                     | Low birth weight, preterm birth: maternal age, region of residence, number of children, family structure, maternal education, maternal employment, body mass index, maternal smoking during pregnancy, and baby's gender.<br>Small for gestational age: maternal age, region of residence, number of children, family structure, maternal education, maternal employment, body mass index, maternal smoking during pregnancy, gestational age, and baby's gender.                                                                                                                                                                                                  |
| [45] Faeco Larsen (2013)                                               | Sex, gestational age, intrauterine growth restriction, maternal age, mother's occupational status, maternal smoking (ever) in first trimester, amount of maternal smoking and alcohol consumption in first trimester.                                                                                                                                                                                                                                                                                                                                                                                                                                              |
| [22] Sayal (2013)                                                      | Maternal age, parity, highest level of maternal education, daily frequency of smoking, use of cannabis and/or other illicit drugs during the first trimester, homeownership, whether currently married, high scores (>12) on the Edinburgh Postnatal Depression Scale, and child gestational age, birth weight and gender.                                                                                                                                                                                                                                                                                                                                         |
| [30] McCarthy (2013)                                                   | Maternal age, smoking, years of schooling, ethnicity, body mass index, infant sex, maternal status, family income, and drug use during pregnancy. Adjusted for clustering. Birthweight adjusted for gestational age at delivery.                                                                                                                                                                                                                                                                                                                                                                                                                                   |
| [40] Andersen (2012)                                                   | Number of previous abortions, coffee consumption, changes in alcohol consumption since prior to pregnancy and smoking. Effect of coffee consumption and smoking was stratified according to period. The model is stratified according to maternal age and parity.                                                                                                                                                                                                                                                                                                                                                                                                  |
| [21] Salihi (2011)                                                     | Maternal age, parity, race, smoking, education, marital status, adequacy of prenatal care, maternal height, gender of the infant, and year of birth                                                                                                                                                                                                                                                                                                                                                                                                                                                                                                                |
| [31] Robinson (2010)                                                   | Maternal age, maternal education, presence of the biological father in the family home, family income, stress in pregnancy, child's age at follow up (and child's age at follow-up squared), and maternal cigarette smoking.                                                                                                                                                                                                                                                                                                                                                                                                                                       |
| [32] Jaddoe (2007)                                                     | Controlled for maternal body mass index, smoking, educational level, height, ethnicity, parity and age and infant gender; birth weight and low birth weight models also controlled for gestational age.                                                                                                                                                                                                                                                                                                                                                                                                                                                            |
| [43] Bille (2007)                                                      | Parental age and social class.                                                                                                                                                                                                                                                                                                                                                                                                                                                                                                                                                                                                                                     |
| [33] Sayal (2007)                                                      | Gender, smoking, cannabis use and use of illicit drugs in the first trimester, highest level of maternal education, home ownership, marital status, parity, maternal age group, high EPDS score, child ethnicity, gestational age group, and birth weight.                                                                                                                                                                                                                                                                                                                                                                                                         |
| [34] Albertsen (2004)                                                  | Type 1 diabetes, age, previous preterm delivery, smoking during pregnancy, coffee consumption during pregnancy, occupational status in the household, parity, and total alcohol consumption during pregnancy.                                                                                                                                                                                                                                                                                                                                                                                                                                                      |
| [35] Lundsberg (1997)                                                  | Small for gestational age: smoking in month 7, ethnicity, weight, height, infant sex, parity, bleeding during pregnancy, high blood pressure, and preeclampsia/eclampsia. Low birthweight: smoking in month 7, height, weight, ethnicity, infant sex, parity, coffee use in month 7, exercise in third trimester, employment, bleeding during pregnancy, high blood pressure, pre-eclampsia/eclampsia, anomalies, and placental problems. Preterm delivery: smoking in month 7, height, parity, age, caffeine use in month 7, exercise first 16 weeks, bleeding during pregnancy, high blood pressure, pre-eclampsia/eclampsia, anomalies, and placental problems. |
| [41] Windham (1997)                                                    | Maternal age, prior spontaneous abortion, gestational age at interview, and cigarette and caffeine consumption in week before interview.                                                                                                                                                                                                                                                                                                                                                                                                                                                                                                                           |
| [36] Passaro (1996)                                                    | Gestational age, infant sex, parity, maternal smoking, and maternal body mass index.                                                                                                                                                                                                                                                                                                                                                                                                                                                                                                                                                                               |
| [37] Shu (1995)                                                        | Gestational age, parity, smoking and income.                                                                                                                                                                                                                                                                                                                                                                                                                                                                                                                                                                                                                       |
| [20] Peacock (1995)                                                    | Unadjusted                                                                                                                                                                                                                                                                                                                                                                                                                                                                                                                                                                                                                                                         |
| [38] Olsen (1991)                                                      | Age, school education, parity, alcohol and smoking entered the model as "dummy variables".                                                                                                                                                                                                                                                                                                                                                                                                                                                                                                                                                                         |
| [42] Ogston (1992)                                                     | Gestational age at birth, sex, mother's age, parity and smoking.                                                                                                                                                                                                                                                                                                                                                                                                                                                                                                                                                                                                   |
| [46] Parry (1992)                                                      | Gestational age at birth, sex, mother's age, parity and smoking.                                                                                                                                                                                                                                                                                                                                                                                                                                                                                                                                                                                                   |
| [39] Brooke (1989)                                                     | Gestational age, sex, maternal height, and parity                                                                                                                                                                                                                                                                                                                                                                                                                                                                                                                                                                                                                  |
| [44] Ernhart (1989)                                                    | Parity, smoking, race and year of study.                                                                                                                                                                                                                                                                                                                                                                                                                                                                                                                                                                                                                           |

1  
2  
3  
4  
5  
6  
7  
8  
9  
10  
11  
12  
13  
14  
15  
16  
17  
18  
19  
20  
21  
22  
23  
24  
25  
26  
27  
28  
29  
30  
31  
32  
33  
34  
35  
36  
37  
38  
39  
40  
41  
42  
43  
44  
45  
46  
47

| Supplementary Table 3. Assessment of studies using the The Newcastle-Ottawa Scale (NOS) |                                          |                                     |                           |                                                       |                                                              |                                            |                                            |                                  |
|-----------------------------------------------------------------------------------------|------------------------------------------|-------------------------------------|---------------------------|-------------------------------------------------------|--------------------------------------------------------------|--------------------------------------------|--------------------------------------------|----------------------------------|
| Risk of bias questions                                                                  | Representativeness of the exposed cohort | Selection of the non-exposed cohort | Ascertainment of exposure | Outcome of interest was not present at start of study | Comparability of cohorts on the basis of the design/analysis | Assessment of outcome blind/record linkage | Follow-up long enough for outcome to occur | Adequacy of follow up of cohorts |
| Study ID                                                                                |                                          |                                     |                           |                                                       |                                                              |                                            |                                            |                                  |
| Albertson 2003                                                                          | ✓                                        | ✓                                   | ✓                         | ✓                                                     | ✓                                                            | ✓                                          | ✓                                          | ✓                                |
| Anderson 2012                                                                           | ✓                                        | ✓                                   | ✓                         | ✓                                                     | ✓                                                            | ✓                                          | ✓                                          | ✓                                |
| Bille 2007                                                                              | ✓                                        | ✓                                   | ✓                         | ✓                                                     | ✓                                                            | ✓                                          | ✓                                          | ?                                |
| Brooke 1989                                                                             | ✓                                        | ✓                                   | ✓                         | ✓                                                     | ✓                                                            | ✓                                          | ✓                                          | ✓                                |
| Erhart                                                                                  | x                                        | ✓                                   | ✓                         | ✓                                                     | ?                                                            | ✓                                          | ✓                                          | x                                |
| Jaddoe 2007                                                                             | ✓                                        | ✓                                   | x                         | ✓                                                     | ✓                                                            | ✓                                          | ✓                                          | ✓                                |
| Larsen 2013                                                                             | ✓                                        | ✓                                   | ✓                         | ✓                                                     | ✓                                                            | x                                          | ✓                                          | x                                |
| Lundsberg (Lisbet) 2015                                                                 | ?                                        | ✓                                   | ✓                         | ✓                                                     | ✓                                                            | ✓                                          | ✓                                          | ✓                                |
| Lundsberg (Lisbet) 1997                                                                 | ?                                        | ✓                                   | ✓                         | ✓                                                     | ✓                                                            | ✓                                          | ✓                                          | ✓                                |
| McCarthy 2013                                                                           | ✓                                        | ✓                                   | ✓                         | ✓                                                     | ✓                                                            | ✓                                          | ✓                                          | ✓                                |
| Miyake 2014                                                                             | ?                                        | ✓                                   | x                         | ✓                                                     | ✓                                                            | ✓                                          | ✓                                          | ✓                                |



|               |   |   |   |   |   |   |   |   |
|---------------|---|---|---|---|---|---|---|---|
| Niclasen 2013 | ? | ✓ | ? | ✓ | x | x | ✓ | ? |
| Nykjaer 2014  | x | ✓ | x | ✓ | ✓ | ✓ | ✓ | ✓ |
| Ogston 1992   | ? | ✓ | ✓ | ✓ | x | ✓ | ✓ | ✓ |
| Olsen 1991    | ? | ✓ | x | ✓ | ✓ | ✓ | ✓ | ✓ |
| Parry 1992    | ? | ✓ | ✓ | ✓ | ✓ | x | ✓ | x |
| Passaro 1996  | ? | ✓ | x | ✓ | ✓ | ✓ | ✓ | ✓ |
| Peacock 1995  | ? | ✓ | ✓ | ✓ | x | ? | ✓ | ✓ |
| Robinson 2010 | ? | ✓ | x | ✓ | ✓ | x | ✓ | ✓ |
| Salihu 2011   | ? | ✓ | x | ✓ | ✓ | ? | ✓ | ✓ |
| Sayal 2012    | ✓ | ✓ | x | ✓ | ✓ | ? | ✓ | ✓ |
| Sayal 2006    | ✓ | ✓ | x | ✓ | ✓ | x | ✓ | ✓ |
| Shu 1995      | ✓ | ✓ | ✓ | ✓ | x | ✓ | ✓ | ✓ |
| Windham 1997  | x | ✓ | ✓ | ✓ | ✓ | ✓ | ✓ | ✓ |

1  
2  
3  
4  
5  
6  
7  
8  
9  
10  
11  
12  
13  
14  
15  
16  
17  
18  
19  
20  
21  
22  
23  
24  
25  
26  
27  
28  
29  
30  
31  
32  
33  
34  
35  
36  
37  
38  
39  
40  
41  
42  
43  
44  
45  
46  
47  
48  
49

**PRISMA 2009 Checklist**

| Section/topic             | #  | Checklist item                                                                                                                                                                                                                                                                                              | Reported on page # |
|---------------------------|----|-------------------------------------------------------------------------------------------------------------------------------------------------------------------------------------------------------------------------------------------------------------------------------------------------------------|--------------------|
| <b>TITLE</b>              |    |                                                                                                                                                                                                                                                                                                             |                    |
| Title                     | 1  | Identify the report as a systematic review, meta-analysis, or both.                                                                                                                                                                                                                                         | 1                  |
| <b>ABSTRACT</b>           |    |                                                                                                                                                                                                                                                                                                             |                    |
| Structured summary        | 2  | Provide a structured summary including, as applicable: background; objectives; data sources; study eligibility criteria, participants, and interventions; study appraisal and synthesis methods; results; limitations; conclusions and implications of key findings; systematic review registration number. | 3                  |
| <b>INTRODUCTION</b>       |    |                                                                                                                                                                                                                                                                                                             |                    |
| Rationale                 | 3  | Describe the rationale for the review in the context of what is already known.                                                                                                                                                                                                                              | 4                  |
| Objectives                | 4  | Provide an explicit statement of questions being addressed with reference to participants, interventions, comparisons, outcomes, and study design (PICOS).                                                                                                                                                  | 5&6                |
| <b>METHODS</b>            |    |                                                                                                                                                                                                                                                                                                             |                    |
| Protocol and registration | 5  | Indicate if a review protocol exists, if and where it can be accessed (e.g., Web address), and, if available, provide registration information including registration number.                                                                                                                               | 5                  |
| Eligibility criteria      | 6  | Specify study characteristics (e.g., PICOS, length of follow-up) and report characteristics (e.g., years considered, language, publication status) used as criteria for eligibility, giving rationale.                                                                                                      | 5 & 6              |
| Information sources       | 7  | Describe all information sources (e.g., databases with dates of coverage, contact with study authors to identify additional studies) in the search and date last searched.                                                                                                                                  | 6                  |
| Search                    | 8  | Present full electronic search strategy for at least one database, including any limits used, such that it could be repeated.                                                                                                                                                                               | supTable 1         |
| Study selection           | 9  | State the process for selecting studies (i.e., screening, eligibility, included in systematic review, and, if applicable, included in the meta-analysis).                                                                                                                                                   | Figure 1           |
| Data collection process   | 10 | Describe method of data extraction from reports (e.g., piloted forms, independently, in duplicate) and any processes for obtaining and confirming data from investigators.                                                                                                                                  | 6                  |

|                                    |    |                                                                                                                                                                                                                        |                          |
|------------------------------------|----|------------------------------------------------------------------------------------------------------------------------------------------------------------------------------------------------------------------------|--------------------------|
| Data items                         | 11 | List and define all variables for which data were sought (e.g., PICOS, funding sources) and any assumptions and simplifications made.                                                                                  | 7 & 8                    |
| Risk of bias in individual studies | 12 | Describe methods used for assessing risk of bias of individual studies (including specification of whether this was done at the study or outcome level), and how this information is to be used in any data synthesis. | 6 & 7                    |
| Summary measures                   | 13 | State the principal summary measures (e.g., risk ratio, difference in means).                                                                                                                                          | Figure 2&3<br>supfigure1 |
| Synthesis of results               | 14 | Describe the methods of handling data and combining results of studies, if done, including measures of consistency (e.g., $I^2$ ) for each meta-analysis.                                                              | Figure 2&3<br>supfigure1 |
| Risk of bias across studies        | 15 | Specify any assessment of risk of bias that may affect the cumulative evidence (e.g., publication bias, selective reporting within studies).                                                                           | 7                        |
| Additional analyses                | 16 | Describe methods of additional analyses (e.g., sensitivity or subgroup analyses, meta-regression), if done, indicating which were pre-specified.                                                                       | 8                        |
| <b>RESULTS</b>                     |    |                                                                                                                                                                                                                        |                          |
| Study selection                    | 17 | Give numbers of studies screened, assessed for eligibility, and included in the review, with reasons for exclusions at each stage, ideally with a flow diagram.                                                        | Figure 1                 |
| Study characteristics              | 18 | For each study, present characteristics for which data were extracted (e.g., study size, PICOS, follow-up period) and provide the citations.                                                                           | Table 1-3                |
| Risk of bias within studies        | 19 | Present data on risk of bias of each study and, if available, any outcome level assessment (see item 12).                                                                                                              | 7                        |
| Results of individual studies      | 20 | For all outcomes considered (benefits or harms), present, for each study: (a) simple summary data for each intervention group (b) effect estimates and confidence intervals, ideally with a forest plot.               | Figure 2&3<br>supfigure1 |
| Synthesis of results               | 21 | Present results of each meta-analysis done, including confidence intervals and measures of consistency.                                                                                                                | Figure 2&3<br>supfigure1 |
| Risk of bias across studies        | 22 | Present results of any assessment of risk of bias across studies (see Item 15).                                                                                                                                        | 13-14                    |
| Additional analysis                | 23 | Give results of additional analyses, if done (e.g., sensitivity or subgroup analyses, meta-regression [see Item 16]).                                                                                                  | Figure 2&3               |

1  
2  
3  
4  
5  
6  
7  
8  
9  
10  
11  
12  
13  
14  
15  
16  
17  
18  
19  
20  
21  
22  
23  
24  
25  
26  
27  
28  
29  
30  
31  
32  
33  
34  
35  
36  
37  
38  
39  
40  
41  
42  
43  
44  
45  
46  
47  
48  
49

|                     |    |                                                                                                                                                                                      |            |
|---------------------|----|--------------------------------------------------------------------------------------------------------------------------------------------------------------------------------------|------------|
|                     |    |                                                                                                                                                                                      | supfigure1 |
| <b>DISCUSSION</b>   |    |                                                                                                                                                                                      |            |
| Summary of evidence | 24 | Summarize the main findings including the strength of evidence for each main outcome; consider their relevance to key groups (e.g., healthcare providers, users, and policy makers). | 13&14      |
| Limitations         | 25 | Discuss limitations at study and outcome level (e.g., risk of bias), and at review-level (e.g., incomplete retrieval of identified research, reporting bias).                        | 13 & 14    |
| Conclusions         | 26 | Provide a general interpretation of the results in the context of other evidence, and implications for future research.                                                              | 13         |
| <b>FUNDING</b>      |    |                                                                                                                                                                                      |            |
| Funding             | 27 | Describe sources of funding for the systematic review and other support (e.g., supply of data); role of funders for the systematic review.                                           | 17         |

# BMJ Open

**Low alcohol consumption and pregnancy and childhood outcomes: time to change guidelines indicating apparently 'safe' levels of alcohol during pregnancy? A systematic review and meta-analyses.**



|                                 |                                                                                                                                                                                                                                                                                                                                                                                                                                                                                                                                                                                                                                                                                                                                                                                                                                                  |
|---------------------------------|--------------------------------------------------------------------------------------------------------------------------------------------------------------------------------------------------------------------------------------------------------------------------------------------------------------------------------------------------------------------------------------------------------------------------------------------------------------------------------------------------------------------------------------------------------------------------------------------------------------------------------------------------------------------------------------------------------------------------------------------------------------------------------------------------------------------------------------------------|
| Journal:                        | <i>BMJ Open</i>                                                                                                                                                                                                                                                                                                                                                                                                                                                                                                                                                                                                                                                                                                                                                                                                                                  |
| Manuscript ID                   | bmjopen-2016-015410.R2                                                                                                                                                                                                                                                                                                                                                                                                                                                                                                                                                                                                                                                                                                                                                                                                                           |
| Article Type:                   | Research                                                                                                                                                                                                                                                                                                                                                                                                                                                                                                                                                                                                                                                                                                                                                                                                                                         |
| Date Submitted by the Author:   | 18-May-2017                                                                                                                                                                                                                                                                                                                                                                                                                                                                                                                                                                                                                                                                                                                                                                                                                                      |
| Complete List of Authors:       | Mamluk, Loubaba; University of Bristol School of Social and Community Medicine, IEU<br>Edwards, Hannah; University of Bristol, School of Social and Community Medicine<br>Savovic, Jelena; University of Bristol, NIHR CLAHRC West<br>Leach, Verity; University of Bristol<br>Jones, Tim; NIHR CLAHRC West,<br>Moore, Theresa; NIHR CLAHRC West<br>Ijaz , Sharea ; NIHR CLAHRC West<br>Lewis, Sarah; University of Bristol, School of Social and Community Medicine<br>Donovan, Jenny; NIHR CLAHRC West<br>Lawlor, Debbie; Department of Social Medicine, University of Bristol, MRC Integrative Epidemiology Unit<br>Davey Smith, George; University of Bristol, Social Medicine<br>Fraser, Abigail; University of Bristol, MRC Integrative Epidemiology Unit<br>Zuccolo, Luisa; University of Bristol, School of Social and Community Medicine |
| <b>Primary Subject Heading</b>: | Epidemiology                                                                                                                                                                                                                                                                                                                                                                                                                                                                                                                                                                                                                                                                                                                                                                                                                                     |
| Secondary Subject Heading:      | Reproductive medicine                                                                                                                                                                                                                                                                                                                                                                                                                                                                                                                                                                                                                                                                                                                                                                                                                            |
| Keywords:                       | PAEDIATRICS, EPIDEMIOLOGY, Maternal medicine < OBSTETRICS                                                                                                                                                                                                                                                                                                                                                                                                                                                                                                                                                                                                                                                                                                                                                                                        |
|                                 |                                                                                                                                                                                                                                                                                                                                                                                                                                                                                                                                                                                                                                                                                                                                                                                                                                                  |

SCHOLARONE™  
Manuscripts

1  
2  
3 Systematic Review & Meta-analysis  
4  
5  
6

7 **Title:** Low alcohol consumption and pregnancy and childhood outcomes: time to change  
8 guidelines indicating apparently 'safe' levels of alcohol during pregnancy? A systematic review  
9 and meta-analyses.  
10  
11  
12

13  
14  
15 **Running title:** Low alcohol consumption and pregnancy and childhood outcomes.  
16  
17

18  
19 **Authors:** Loubaba Mamluk PhD<sup>1,2,3</sup>, Hannah B Edwards MSc<sup>2,3</sup>, Jelena Savović PhD<sup>2,3</sup>, Verity  
20 Leach PhD<sup>2,3</sup>, Timothy Jones PhD<sup>2,3</sup>, Theresa HM Moore MSc<sup>2,3</sup>, Sharea Ijaz PhD<sup>2,3</sup>, Sarah  
21 J. Lewis PhD<sup>2</sup>, Jenny L. Donovan PhD<sup>2,3</sup>, Debbie Lawlor PhD<sup>1,2,3</sup>, George Davey Smith PhD  
22 <sup>1,2</sup>, Abigail Fraser PhD<sup>\*1,2</sup>, Luisa Zuccolo PhD<sup>\*1,2</sup>  
23  
24  
25  
26

27 *\* Joint Last Authors*  
28  
29

30  
31  
32 **Author addresses:** Hannah B Edwards, Jelena Savovic, Verity Leach, Timothy Jones,  
33 Theresa HM Moore, Sharea Ijaz, and Jenny L. Donovan: NIHR CLAHRC West, University  
34 Hospitals Bristol, NHS Foundation Trust, 9th Floor, Whitefriars, Lewins Mead, Bristol, BS1  
35 2NT, United Kingdom. Sarah J. Lewis, Debbie Lawlor, George Davey Smith, Abigail Fraser,  
36 and Luisa Zuccolo: MRC Integrative Epidemiology Unit, School of Social and Community  
37 Medicine, University of Bristol, Oakfield House, Oakfield Grove, Bristol BS8 2BN, United  
38 Kingdom.  
39  
40  
41  
42  
43  
44  
45

46  
47 **Corresponding author:** Loubaba Mamluk, MRC Integrative Epidemiology Unit, School of  
48 Social and Community Medicine, University of Bristol, Oakfield House, Oakfield Grove, Bristol  
49 BS8 2BN, United Kingdom. NIHR CLAHRC West, University Hospitals Bristol  
50 NHS Foundation Trust, 9<sup>th</sup> Floor, Whitefriars, Lewins Mead Bristol, BS1 2NT. United Kingdom  
51 T+44 (0)117 3313378, l.mamluk@bristol.ac.uk  
52  
53  
54  
55  
56

**Author affiliations:**

- 1- MRC Integrative Epidemiology Unit at the University of Bristol, Bristol
- 2- School of Social and Community Medicine, University of Bristol, Bristol
- 3- NIHR CLAHRC West, University Hospitals Bristol NHS Foundation Trust, Bristol

**Word Count:** 3802**Figures:** 3**Tables:** 3**Supplementary Tables:** 3**Supplementary Figures:** 1**Supplementary Document:** 1**Number of references:** 61

peer review only

## Abstract:

**Objectives:** To determine the effects of low-to-moderate levels of maternal alcohol consumption in pregnancy on pregnancy and longer-term offspring outcomes.

**Search Strategy:** Medline, Embase, Web of Science, and Psycinfo from inception to 11-07-2016.

**Selection Criteria:** Prospective observational studies, negative control and quasi-experimental studies of pregnant women estimating effects of light drinking in pregnancy ( $\leq 32\text{g/week}$ ) versus abstaining. Pregnancy outcomes such as birth weight, and features of fetal alcohol syndrome were examined.

**Data Collection and Analysis:** One reviewer extracted data and another checked extracted data. Random effects meta-analyses were performed where applicable, and a narrative summary of findings was carried out otherwise.

**Main Results:** 24 cohort and two quasi-experimental studies were included. With the exception of birth size and gestational age, there was insufficient data to meta-analyse or make robust conclusions. Odds of small-for-gestational-age (SGA) and preterm birth were higher for babies whose mothers consumed up to  $32\text{g/week}$  versus none, but estimates for preterm birth were also compatible with no association: summary odd ratios (OR) 1.08, 95% confidence intervals (CI) (1.02 to 1.14),  $I^2$  0%, (7 studies, all estimates were adjusted) OR 1.10, 95%CI (0.95 to 1.28),  $I^2$  60%, (9 studies, includes one unadjusted estimates) respectively. The earliest time points of exposure were used in the analysis.

**Conclusion:** Evidence of the effects of drinking  $\leq 32\text{g/w}$  in pregnancy is sparse. As there was some evidence that even light prenatal alcohol consumption is associated with being SGA and preterm delivery, guidance could advise abstinence as a precautionary principle, but should explain the paucity of evidence.

**Keywords:** Alcohol, pregnancy, systematic review.



## Strengths and Limitations of this study:

### Strengths

- Completeness of searches with a focused research question aimed at informing alcohol in pregnancy guidelines.
- Biases minimised by only including those with prospective assessment of exposure and prioritising results adjusted for main confounders.
- Unique effort to include alternative study designs to further improve causal inference alongside standard analytical approaches.

### Limitations

- Limitation of results on the effects of light drinking in pregnancy from standard analytical approaches is bias due to residual confounding.
- The inclusion of only English language studies may have led to missing some studies, however there is little evidence that exclusion of non-English language studies leads to systematic bias in systematic reviews of conventional medicine.
- We could not pool eligible studies for various reasons (e.g. too few studies, lack of standard errors)

**Keywords:** Alcohol, pregnancy, systematic review.

## Introduction

Alcohol is a known teratogen[1] and the evidence about the risks of heavy alcohol consumption during pregnancy on intellectual ability, birth defects, behaviour, fine motor skills, and mental health (comprising fetal alcohol spectrum disorder – FASD)[2] is clear and compelling.[3] Internationally, clinical guidelines recommend that pregnant women should abstain from heavy or “binge” drinking.[4] However, until recently UK guidelines advised women to avoid drinking alcohol while trying to conceive, and in the first trimester, but at the same time indicated that consumption should be restricted to within “1 to 2 UK units, once or twice a week”. [5] The UK Chief Medical Officer (CMO) commissioned a review of guidelines on alcohol consumption during pregnancy. Based on a review of reviews, the Guidelines Development Expert Group has recently proposed a change to guidelines such that women should be advised to abstain from alcohol when pregnant and/or trying to conceive,[6] based on the precautionary principle (i.e. “better safe than sorry”), in the absence of robust evidence.

Our aim was to conduct a comprehensive systematic review and meta-analysis of the literature to determine the effects of low-to-moderate levels of maternal alcohol consumption in pregnancy on pregnancy and longer term offspring outcomes. Here we report on alcohol consumption of up to two UK units of alcohol up to twice a week (the equivalent of ~ 32g/week), compared to no alcohol. In the absence of evidence from randomised controlled trials, we examine observational studies of pregnant women from the general population with prospective assessment of alcohol exposure, to reduce recall bias. In particular, we specifically seek out quasi-experimental studies, negative control comparisons, and Mendelian randomisation analyses in order to reduce the impact of confounding and measurement error on the effect estimates.

## Methods

### Selection strategy and selection criteria

A full protocol of this systematic review carried out using PRISMA guidelines (supplementary document)[7] is available from the PROSPERO systematic review register (registration number CRD4201501594);

[http://www.crd.york.ac.uk/PROSPERO/display\\_record.asp?ID=CRD42015015941](http://www.crd.york.ac.uk/PROSPERO/display_record.asp?ID=CRD42015015941)).

In brief, eligible studies were defined as epidemiological studies of pregnant women or women trying to conceive with prospective assessment of prenatal alcohol exposure (i.e. before birth), sampled from general population. The protocol specifically included studies using standard analytical approaches (e.g. multivariable regression analysis), as well as studies that used innovative analytical methods to improve causal inference, such as (i) quasi-experimental studies (for example comparing outcomes before and after implementation of new guidelines on alcohol consumption); (ii) negative control studies (e.g. comparing the association of offspring outcomes with maternal alcohol consumption to the association of the same outcomes with consumption among fathers, under the assumption that confounding is likely to be similar but that if there was a direct causal effect of maternal consumption on outcomes, maternal associations would be stronger); and Mendelian randomisation studies (using genetic variants associated with alcohol consumption and metabolism). We considered these analytical approaches to be the most appropriate in terms of their ability to minimise bias from confounding and other sources. Our original protocol included studies exploring the effects of prenatal alcohol consumption up to 83g/week (the commonly used threshold for moderate consumption [8-10]) versus abstinence. Here we have focused specifically on low alcohol consumption, i.e. up to 32g/week as this was the cut-off specified by the UK guidelines at the time of writing this review as being an implicitly “safe” threshold.[5] This specific cut off value has not been reviewed and is the main point of discussion as the guideline change from low consumption

1  
2  
3 (equating to 1 to 2 UK units, once or twice a week or 32g/week) to abstinence (reference  
4 group).

5  
6  
7 Outcomes included: 1) pregnancy outcomes: still birth (pregnancy loss after week 24;  
8 miscarriage; gestational length and preterm delivery (<37 weeks gestation); hypertensive  
9 disorders of pregnancy; gestational diabetes; small for gestational age (SGA), < 10th  
10 percentile in weight or <-2 standard deviation scores) and birth size (weight (including low  
11 birth weight defined as <2500g), length, and head circumference); low amniotic fluid  
12 (oligohydramnios); placenta previa; placental abruption; assisted delivery (including vacuum  
13 extraction, forceps delivery, Caesarean section); Apgar score at birth; admission to neonatal  
14 unit; congenital malformations. 2) Features of foetal alcohol spectrum disorder (FASD):  
15 childhood growth restriction; cranium size and head circumference; developmental delays;  
16 behaviour problems; cognitive impairment and intelligent quotient (IQ); facial malformations.  
17 We adopted study specific definitions for all outcomes.  
18  
19  
20  
21  
22  
23  
24  
25  
26  
27  
28  
29

30 Studies were excluded if: there was no quantitative measure of alcohol consumption that  
31 could be converted to grams of alcohol/week; there was insufficient data to estimate the  
32 effect size of the association of our pre-defined low consumption categories versus  
33 abstinence with any outcome, including studies that analysed alcohol as a continuous  
34 variable (i.e. assuming the same linear or log linear effect across the entire alcohol  
35 distribution); the lowest exposure category (compared to non-drinkers) had an upper bound  
36 exceeding 32g/week, or was unspecified; they were cohort studies of pregnant women with  
37 alcohol abuse/dependency; they were case-control studies or cohort studies with  
38 retrospective alcohol consumption assessment (e.g. after birth).  
39  
40  
41  
42  
43  
44  
45  
46  
47

48 The following databases were searched: MEDLINE, PsycINFO, EMBASE on Ovid; the  
49 Cochrane Library including CENTRAL (the Cochrane Central Database of Controlled Trials)  
50 on Wiley Interscience; and Science Citation Index, Social Science Citation Index, on Web of  
51 Science from inception to 11 July 2016 (supplementary Table 1). We limited the search to  
52  
53  
54  
55  
56

1  
2  
3 English language papers and excluded animal studies, letters, editorials, and conference  
4 proceedings for which there were no full-text papers. Searches were tailored to each  
5 database by investigators. The search focused on published medical literature and did not  
6 include grey literature. We additionally performed manual searches of the reference lists of:  
7  
8

9  
10  
11 (i) all papers included in recent systematic reviews of the effects of prenatal alcohol  
12 exposure on the outcomes of interest; and (ii) all recent papers citing those reviews.  
13

14  
15 Titles and abstracts, and full texts if necessary, were screened independently by two  
16 reviewers. Discrepancies were discussed and disagreements resolved through consensus.  
17

18  
19 We assessed potential for bias in included studies by assessing how well the study adjusted  
20 for several main confounders known to impact on the exposure-outcome associations  
21 (socioeconomic positioning as measured by the individual study, smoking during pregnancy,  
22 maternal age, and ethnicity). We considered the potential for confounding and bias across  
23 studies included in the analyses and described it narratively alongside summary results.  
24  
25  
26  
27  
28

### 29 30 Data extraction

31  
32 Data were extracted into a custom-built Microsoft Access database. We extracted the  
33 following information from each study: title, authors, publication year, country/region, study  
34 design, population characteristics (sample size, methods of sampling, age distribution, and  
35 ethnicity), measures of exposure (assessment method; including timing and quantification of  
36 alcohol consumption, reference group (abstinence), exposure (e.g 1-2 units or 2-4 units),  
37 and information on unit equivalence if stated), outcome assessment methods (including  
38 whether this was abstracted from medical records, obtained via a research interview and the  
39 person reporting the outcome e.g. parent, teacher, health professional, researcher or child),  
40 model adjustments, and study results. If a study reported more than one result for each  
41 outcome, we extracted all of them (e.g. relative to different timing of exposure, model  
42 adjustments, etc.). Information from each included paper was extracted by one reviewer  
43 (LM) and subsequently checked for accuracy and completeness by another reviewer  
44  
45  
46  
47  
48  
49  
50  
51  
52  
53  
54  
55  
56  
57  
58  
59  
60

1  
2  
3 (HE).[11] Extraction errors were minimal and were resolved through discussion between  
4  
5 extractor and checker.  
6  
7

### 8 Alcohol unit conversion

9  
10 Alcohol consumption in drinks/week was converted into grams/week based on the pure  
11 ethanol equivalent of one drink, as stated in each individual article, or otherwise inferred  
12 based on the definition of standard drinks in the country where the study took place.  
13  
14

### 15 Data analysis

16  
17 The association of low alcohol use with pregnancy and related outcomes was investigated  
18 comparing the highest category within the range of 0-32g/week to abstinence (during  
19 pregnancy). In studies providing data across several categories of intake within the 0-  
20 32g/week range, we used the effect estimate for the highest category of intake. If studies  
21 reported on exposure to alcohol during different trimesters, we included estimates relative to  
22 the earliest exposure. This is because for some outcomes, the first trimester tends to be the  
23 most critical timing/window of exposure [12] [13] and because most studies that only  
24 reported on one time point reported on exposure in early gestation. Similarly, if results were  
25 available from both unadjusted and adjusted regressions, we prioritised fully adjusted  
26 results, as a way of minimising the impact of confounding by important factors such as  
27 maternal smoking, age, socio-economic position and ethnicity. In case of multiple results  
28 from the same cohort (relative to the same outcome), we analysed those pertaining to the  
29 largest population size (i.e. conducted on the least 'selected' population as result of  
30 exclusions, to minimise selection bias). Results from all studies that fulfilled our inclusion  
31 criteria were summarised, together with information about the study. Where appropriate, we  
32 additionally pooled results for each outcome. Authors were not contacted for extra data.  
33  
34 Results from Different study designs have been reviewed separately. Individual study  
35 estimates were pooled using random effects meta-analysis. Where only two studies were  
36 available to meta-analyse, results were pooled unless they were very different from each  
37  
38  
39  
40  
41  
42  
43  
44  
45  
46  
47  
48  
49  
50  
51  
52  
53  
54  
55  
56  
57  
58  
59  
60

1  
2  
3 other ( $I^2 \geq 50\%$ ).[14] In this case, a narrative summary of findings was carried out and  
4  
5 results were reported in Table 2. Where a study only reported unadjusted results, we kept  
6  
7 these separate in the forest plots (sub-group analysis) but then also showed overall pooled  
8  
9 estimates combining all results.

10  
11 Planned sub-group analyses by trimester could not be performed due to insufficient number  
12  
13 of included studies with this information.

#### 14 Risk of bias assessment

15  
16  
17 The Newcastle-Ottawa Scale (NOS)[15] was used to assess risk of bias for included reports.

18  
19 This is an eight-item questionnaire assessing the following: representativeness of the  
20  
21 exposed cohort; selection of the non-exposed cohort; exposure assessment methods;  
22  
23 absence of outcome (of interest) at the start of the study; comparability of exposed and non-  
24  
25 exposed groups (with regard to confounding variables); blind assessment of exposure and  
26  
27 outcome; and length and adequacy of follow up. NOS allocates 'stars' for adequate  
28  
29 methods, but does not specifically advise calculating the sum of allocated stars to give an  
30  
31 overall score. Scores for quality are not helpful in assessing the effect of risk of bias on a  
32  
33 meta-analysis so we report each item separately in line with recommended methods [16 17].

34  
35 To be assessed as adequate for comparability of cohorts (risk of confounding) a study had to  
36  
37 control for the following four pre-specified potential confounding factors related to foetal  
38  
39 development: maternal age, socio-economic status (SES), ethnicity, and smoking.

40  
41  
42  
43 The likelihood of small study bias, such as publication bias, could not be assessed through  
44  
45 visual inspection of funnel plots for pooled analyses as no outcome was assessed by 10+  
46  
47 studies [18]. Statistical analyses were carried out using Stata version 13.1 (StataCorp,  
48  
49 College Station, TX, USA).[19]

#### 50 **Results**

51  
52  
53 A flowchart of the article review process is shown in Figure 1. A total of 4680 citation records  
54  
55 were identified from searching the four relevant databases. A manual search of recent  
56  
57

1  
2  
3 systematic reviews identified 33 additional articles. After exclusions, 24 prospective studies  
4  
5 analysed using standard approaches and two quasi-experimental studies were included,  
6  
7 reporting on 30 outcomes in total.

#### 8 9 Risk of bias

10  
11 Six studies (Albertson 2003; Anderson 2012; Bille 2007; Brooke 1989; Lundsberg 2015;  
12  
13 McCarthy 2013) had low risk of bias for all eight NOS items and were therefore considered  
14  
15 at low risk of bias overall. All studies were judged to be at a low risk of bias for the following  
16  
17 three NOS items (supplementary Table 3): selection of the non-exposed cohort (always from  
18  
19 the same source population as the exposed cohort); the absence of outcome at the start of  
20  
21 the study; and adequate length of follow up for outcome to have occurred. Fourteen studies  
22  
23 had adequate ascertainment of exposure as these were all based on structured interviews or  
24  
25 validated records. Objective outcome assessments (assessor unaware of the exposure  
26  
27 status) were reported in 16 of the studies. For five others either parent self-report was used  
28  
29 (high risk), and for the remaining three the method of outcome assessment was not reported  
30  
31 (unclear risk). Eleven studies did not report enough detail to decide if cohorts were  
32  
33 representative of the population, therefore only 10 could be judged as low risk. Only four  
34  
35 studies did not control for the pre-specified potential confounding factors, and one did not  
36  
37 report enough detail to permit judgement. Thus, in the majority of studies (19) the compared  
38  
39 groups were similar. Nineteen studies had adequate follow up of the cohort (small loss to  
40  
41 follow up). Only three were judged high risk for this item and two studies presented  
42  
43 insufficient information to make a clear judgment.  
44  
45  
46  
47  
48  
49  
50  
51  
52  
53  
54  
55  
56  
57  
58  
59  
60



1  
2  
3 Studies included in the meta-analysis are presented in Table 1. Standard analytical  
4 approaches pooled estimates for continuous and binary outcomes are presented in Figure 2  
5 and 3 respectively. Figure 2 presents results for birthweight (7 studies). Figure 3A presents  
6 results for preterm delivery (9 studies) Figure 3B, presents results for SGA (7 studies), and  
7 results for low birthweight (6 studies) are given in Figure 3C.  
8  
9

10  
11  
12 The meta-analysis yielded a summary OR of 1.10 (95% CI 0.95; 1.28) for preterm delivery,  
13 but there was substantial statistical heterogeneity between studies ( $I^2=60\%$ ), due to a large  
14 Danish study reporting a protective effect (Figure 3A). Additionally, most studies assessing  
15 preterm birth had corrected for main confounders known to be associated with preterm birth,  
16 with the exception of [20] that did not correct for any. There was also modest evidence for  
17 an increased risk of being SGA (OR 1.08, 95% CI 1.02; 1.14) for a total of 288512  
18 participants, although this was almost entirely driven by a single US study contributing 95%  
19 of the participants to this meta-analysis (Figure 3B). The birthweight meta-analysis yielded a  
20 summary effect of -13.49g (95% CI -30.28g; +3.31g) for offspring of light drinkers versus  
21 non-drinkers (Figure 2). Summary effect for birthweight <2500g was, OR 1.00, 95% CI 0.82;  
22 1.22 (Figure 3C).  
23  
24

25  
26  
27 Other outcomes were typically reported by a limited number of studies and mostly could not  
28 be meta-analysed due to clinical heterogeneity in outcome assessment or incompleteness of  
29 published data (supplementary Figure 1, and Table 2). Based on two studies with data on  
30 behavioural outcomes, there was little evidence of any effect for internalising symptoms but  
31 a suggestion that light drinking in pregnancy protected against high externalising behaviour  
32 scores (OR 0.97, (95%CI 0.93; 1.01, supplementary Figure 1)). However, an additional  
33 study assessing conduct problems and hyperactivity (in the same externalising domain)  
34 reported results in the opposite direction, which could not be meta-analysed due to different  
35 outcome definitions.  
36  
37  
38  
39  
40  
41  
42  
43  
44  
45  
46  
47  
48  
49  
50  
51  
52  
53  
54  
55  
56  
57  
58  
59  
60

1  
2  
3 Table 2 presents results of included studies that did not contribute to the meta-analyses for  
4 various reasons. There was no strong evidence of association between consuming up to 32  
5 g/week of alcohol and any of the remaining outcomes excluded from meta-analyses, with  
6  
7  
8 three exceptions: a very large US study showing increased risk of placental abruption and  
9  
10  
11 decreased risk of pre-eclampsia (OR 1.24, 95%CI 1.05; 1.46 and OR 0.82, 95% CI 0.74;  
12  
13 0.90, respectively)[21], and a single British study reporting better cognitive outcomes in  
14  
15 children exposed to light maternal drinking in pregnancy.[22]

16  
17 We did not include funnel plots as no outcome was assessed by 10+ studies.

18  
19 Of all included results, only two were unadjusted[20 23], and most of the others were  
20  
21 adjusted for maternal smoking, age and socio-economic position (supplementary Table 2).

22  
23 Studies that did not adjust for ethnicity were generally conducted in homogenous  
24  
25 populations. Due to the small number of studies for each outcome, we could not further  
26  
27 investigate the effect of adjusting for all or some of these confounders. Similarly, there was  
28  
29 insufficient data to examine the effect of timing of exposure on outcomes.

### 30 31 32 Alternative analytical approaches

33 Two negative control publications[24] based on the same UK cohort met our inclusion  
34  
35 criteria (Table 3).[23 25] They investigated the effects of maternal alcohol consumption on  
36  
37 childhood educational achievement[25] and IQ.[23] Offspring exposed to maternal  
38  
39 consumption of <12g/week of alcohol in the first trimester did not have worse outcomes  
40  
41 compared to those of mothers who abstaining from alcohol, and a similar pattern was found  
42  
43 for paternal alcohol consumption.

44  
45 One further quasi-experimental study, one natural experiment and five Mendelian  
46  
47 randomisation studies were excluded from the present review because they did not  
48  
49 specifically test the effect of consuming up to 32g/week in pregnancy versus abstaining.

50  
51 These will be included in a forthcoming review focused on estimating the causal effects of  
52  
53 prenatal alcohol exposure based on alternative study designs and analytical approaches to  
54  
55 strengthen causal evidence.  
56

**Table 1.** Prospective studies examining the effects of prenatal alcohol exposure on pregnancy outcomes (studies included in the meta-analysis)

| Study (year)          | Country                                 | Event             | Total number | Outcomes                                                                                                                                                                                                                       | Timing of exposure                                        | Age at outcome assessment (child) | Adjusted (yes/no) |
|-----------------------|-----------------------------------------|-------------------|--------------|--------------------------------------------------------------------------------------------------------------------------------------------------------------------------------------------------------------------------------|-----------------------------------------------------------|-----------------------------------|-------------------|
| [26] Lundsberg (2015) | USA                                     | 191<br>315<br>274 | 3,907        | Birth weight (<2500g)<br>SGA (< 10 <sup>th</sup> percentile)<br>Preterm birth (<37 weeks)                                                                                                                                      | 1 <sup>st</sup> trimester                                 | Birth                             | Yes               |
| [27] Nykjaer (2014)   | UK                                      | -<br>-<br>-       | 535          | Birth weight (g)<br>Customised birth centile<br>SGA (< 10 <sup>th</sup> centile)<br>Low birth weight (<2500g)<br>Preterm birth (<37 weeks)                                                                                     | 1 <sup>st</sup> trimester                                 | Birth                             | Yes               |
| [28] Niclasen (2014)  | Denmark                                 | -                 | 10,649       | 10% with highest problem scores, Strengths & Difficulties Questionnaire (SDQ), Parent report<br>Boys Internalising behaviour<br>Girls Internalising behaviour<br>Boys Externalising behaviour<br>Girls Externalising behaviour | Entire pregnancy                                          | 7 years                           | Yes               |
| [29] Miyake (2014)    | Japan                                   | 126<br>185<br>-   | 1,493        | Preterm birth (<37 weeks)<br>SGA (< 10 <sup>th</sup> percentile)<br>Adjusted mean birth weight<br>Low birth weight (<2500g)                                                                                                    | Between 5th and 39th weeks of pregnancy                   | 0-11 months                       | Yes               |
| [30] McCarthy (2013)  | New Zealand, Australia, UK, and Ireland | 202<br>325<br>150 | 3166         | Birthweight<br>SGA (< 10 <sup>th</sup> percentile)<br>Preterm birth (<37 weeks)                                                                                                                                                | 1 <sup>st</sup> trimester                                 | Birth                             | yes               |
| [21] Salihu (2011)    | USA                                     | -                 | -            | Preterm birth (<37 weeks)<br>SGA (< 10 <sup>th</sup> percentile)                                                                                                                                                               | Within the gestational age range 20-44 weeks              | Birth                             | Yes               |
| [31] Robinson (2010)  | Australia                               | 202               | 1335         | Clinically significant problems (T score ≥60), Child Behaviour Checklist (CBCL)<br>Parent report<br>Internalising behaviour<br>Externalising behaviour                                                                         | 2nd trimester                                             | 2-14 years inclusive              | Yes               |
| [32] Jaddoe (2007)    | Holland; UK                             | -<br>-<br>-       | 4,132        | Low birth weight<br>SGA (weight < -2 standard deviation scores)<br>Preterm birth (<37 weeks)<br>Birth weight                                                                                                                   | Late pregnancy                                            | Birth                             | Yes               |
| [33] Sayal (2007)     | UK                                      | -                 | 10,323       | 10% with highest problem scores, Strengths & Difficulties Questionnaire (SDQ)<br>parent report <i>Hyperactivity</i> - Externalising                                                                                            | 1st trimester                                             | 7.75 years                        | Yes               |
| [33] Sayal (2007)     | UK                                      | -                 | 10,323       | 10% with highest problem scores, Strengths & Difficulties Questionnaire (SDQ)<br>parent report <i>Conduct problems</i> - Externalising                                                                                         | 1st trimester                                             | 7.75 years                        | Yes               |
| [34] Albertsen (2004) | Denmark                                 | 1488              | 29,463       | Preterm birth (<37 weeks)<br>Moderate preterm birth (32-37 weeks)<br>Very preterm birth (<32 weeks)                                                                                                                            | During pregnancy                                          | Birth                             | Yes               |
| [35] Lundsberg (1997) | USA                                     |                   | 2,062        | SGA (lowest 10 <sup>th</sup> percentile)<br>Low birth weight<br>Preterm delivery (<37 weeks)                                                                                                                                   | 1 <sup>st</sup> trimester                                 | Birth                             | Yes               |
| [36] Passaro (1996)   | UK                                      |                   | 8,886        | Birth weight (g)                                                                                                                                                                                                               | At booking for antenatal care (before 24 weeks gestation) | Birth                             | Yes               |
| [37] Shu (1995)       | USA                                     |                   | 638          | Birth weight (g)                                                                                                                                                                                                               | Throughout pregnancy (12.9, 28 & 36 weeks gestation)      | Birth                             | Yes               |
| [20] Peacock (1995)   | UK                                      | 64                | 901          | Preterm birth (<37 weeks)                                                                                                                                                                                                      | At booking for antenatal care (before 24 weeks gestation) | Birth                             | No                |

1  
2  
3  
4  
5  
6  
7  
8  
9  
10  
11  
12  
13  
14  
15  
16  
17  
18  
19  
20  
21  
22  
23  
24  
25  
26  
27  
28  
29  
30  
31  
32  
33  
34  
35  
36  
37  
38  
39  
40  
41  
42  
43  
44  
45  
46  
47  
48  
49

|                    |         |       |                       |                                     |       |     |
|--------------------|---------|-------|-----------------------|-------------------------------------|-------|-----|
| [38] Olsen (1991)  | Denmark | 8772  | Birth weight (<2500g) | During the first 36 weeks gestation | Birth | yes |
| [39] Brooke (1989) | UK      | 1,140 | Birthweight (g)       | Early pregnancy                     | Birth | yes |

SGA: small for gestation age

For peer review only

**Table 2.** Prospective studies examining the effects of prenatal alcohol exposure on pregnancy outcomes (results not included in the meta-analysis)

| Outcome                                                    | Study (year)          | Country (Total number)                                                   | Outcome details                                          | Reason not included in meta-analysis  | Age at outcome assessment (child)                                               | Results <sup>[1]</sup>                                                                               | Adjusted (yes/no) |
|------------------------------------------------------------|-----------------------|--------------------------------------------------------------------------|----------------------------------------------------------|---------------------------------------|---------------------------------------------------------------------------------|------------------------------------------------------------------------------------------------------|-------------------|
| <b>Pregnancy outcomes</b>                                  |                       |                                                                          |                                                          |                                       |                                                                                 |                                                                                                      |                   |
| <b>Stillbirth</b>                                          | [40] Andersen (2012)  | Denmark (89,322)                                                         | Stillbirth                                               | Estimates are in different directions | (Outcome confirmed via National / Hospital Registries, or from maternal report) | OR 0.90 (95% CI 0.73 – 1.12)                                                                         | Yes               |
|                                                            | [21] Salihu (2011)    | USA (1,226,685)                                                          | Stillbirth                                               | Estimates are in different directions | Birth                                                                           | OR 1.10 (95% CI 0.88 – 1.39)                                                                         | Yes               |
| <b>Miscarriage</b>                                         | [40] Andersen (2012)  | Denmark (89,322)                                                         | Miscarriage in first trimester                           | Only study with this outcome          | (Outcome confirmed via National / Hospital Registries, or from maternal report) | OR 1.05 (95% CI 0.94 – 1.18)                                                                         | Yes               |
|                                                            | [41] Windham (1997)   | USA (5,324)                                                              | Spontaneous abortion occurring ≤20 weeks gestation       | Only study with this outcome          | (Outcome confirmed via medical records)                                         | OR 1.0 (95% CI 0.7 – 1.5)                                                                            | Yes               |
| <b>Gestational age and preterm birth</b>                   | [36] Passaro (1996)   | UK (10,539)                                                              | Gestational age                                          | Only study with this outcome          | Birth                                                                           | Mean gestational age 40.1 (SD 1.9) for those exposed, compared to 40.1 (SD 2.0) for those unexposed. | Yes               |
|                                                            | [42] Ogston (1992)    | Netherlands, Scotland, France, Spain, Denmark, Germany, Portugal (8,453) | Per cent of infants with gestational age <37 weeks       | SE/SD not reported                    | Birth                                                                           | 3.7% in those exposed compared to 3.9% in those unexposed.                                           | Yes               |
| <b>Birthweight</b>                                         | [42] Ogston (1992)    | Netherlands, Scotland, France, Spain, Denmark, Germany, Portugal (8,453) | Mean birthweight (g) in non-smokers                      | SE/SD not reported                    | Birth                                                                           | 3414g in those exposed, compared to 3363g in those unexposed.                                        | Yes               |
|                                                            | [42] Ogston (1992)    | Netherlands, Scotland, France, Spain, Denmark, Germany, Portugal (8,453) | Mean birthweight (g) in smokers                          | SE/SD not reported                    | Birth                                                                           | 3225g in those exposed, compared to 3225g in those unexposed.                                        | Yes               |
| <b>Placenta-related</b>                                    | [21] Salihu (2011)    | USA (1,226,685)                                                          | Placental abruption                                      | Only study with this outcome          | Birth                                                                           | OR 1.24 (95% CI 1.05 – 1.46)                                                                         | Yes               |
| <b>Pre-eclampsia</b>                                       | [21] Salihu (2011)    | USA (1,226,685)                                                          | Placenta previa                                          | Only study with this outcome          | Birth                                                                           | OR 1.11 (95% CI 0.87 – 1.43)                                                                         | Yes               |
|                                                            | [21] Salihu (2011)    | USA (1,226,685)                                                          | Pre-eclampsia                                            | Only two studies with this outcome    | Birth                                                                           | OR 0.82 (95% CI 0.74 – 0.90)                                                                         | Yes               |
|                                                            | [30] McCarthy (2013)  | New Zealand, Australia, Ireland, UK                                      | Pre-eclampsia                                            | Only two studies with this outcome    | Birth                                                                           | OR 0.59 (95% CI 0.35 – 0.99)                                                                         | Yes               |
| <b>Height</b>                                              | [26] Lundsberg (2015) | USA (4,496)                                                              | Lowest 10 <sup>th</sup> percentile of birth length       | Only study with this outcome          | Birth                                                                           | OR 1.10 (95% CI 0.78 – 1.54)                                                                         | Yes               |
| <b>Head circumference</b>                                  | [26] Lundsberg (2015) | USA (4,496)                                                              | Lowest 10 <sup>th</sup> percentile of head circumference | Only study with this outcome          | Birth                                                                           | OR 1.08 (95% CI 0.83 – 1.42)                                                                         | Yes               |
| <b>Apgar score</b>                                         | [26] Lundsberg (2015) | USA (4,496)                                                              | Apgar <7 at 5 minutes                                    | Only study with this outcome          | Birth                                                                           | OR 1.61 (95% CI 0.67 – 3.84)                                                                         | Yes               |
| <b>Admission to Neonatal Intensive Care Unit (NICU)</b>    | [26] Lundsberg (2015) | USA (4,496)                                                              | Admission to NICU                                        | Only study with this outcome          | Birth                                                                           | OR 1.12 (95% CI 0.86 – 1.46)                                                                         | Yes               |
| <b>Features of foetal alcohol spectrum disorder (FASD)</b> |                       |                                                                          |                                                          |                                       |                                                                                 |                                                                                                      |                   |
| <b>Malformations</b>                                       | [26] Lundsberg (2015) | USA (4,496)                                                              | Major malformations                                      | Only study with this outcome          | Birth                                                                           | OR 0.78 (95% CI 0.40 – 1.50)                                                                         | Yes               |

|                               |                          |                                                                          |                                                                                                                      |                                        |               |                                                                                                         |     |
|-------------------------------|--------------------------|--------------------------------------------------------------------------|----------------------------------------------------------------------------------------------------------------------|----------------------------------------|---------------|---------------------------------------------------------------------------------------------------------|-----|
|                               | [43] Bille (2007)        | Denmark (1020)                                                           | Oral clefts                                                                                                          | Only study with this outcome           | Birth         | OR 1.06 (95% CI 0.74 – 1.50)                                                                            | Yes |
|                               | [44] Ernhart (1989)      | USA (873)                                                                | Craniofacial anomalies                                                                                               | SE/SD not reported                     | Birth         | Mean craniofacial anomalies was 1.92 for those exposed, compared to 1.85 for those unexposed (p=0.26)   | Yes |
|                               | [44] Ernhart (1989)      | USA (873)                                                                | Total anomalies                                                                                                      | SE/SD not reported                     | Birth         | Mean total anomalies was 2.60 for those exposed, compared to 2.53 for those unexposed (p=0.28)          | Yes |
| <b>Motor development</b>      | [45] Faebo Larsen (2013) | Denmark (32,097)                                                         | Developmental Coordination Disorder (DCD)                                                                            | Only study with this outcome           | 7 years       | OR 0.85 (95% CI 0.70 – 1.03)                                                                            | Yes |
| <b>Behaviour /development</b> | [33] Sayal (2007)        | UK (967)                                                                 | 10% with highest problem scores, Strengths & Difficulties Questionnaire (SDQ) parent report <i>Conduct problems</i>  | Later age used in analysis             | 3.9 years     | OR 1.14 (95% CI 0.98 – 1.32)                                                                            | Yes |
|                               | [33] Sayal (2007)        | UK (1077)                                                                | 10% with highest problem scores, Strengths & Difficulties Questionnaire (SDQ) parent report <i>Hyperactivity</i>     | Later age used in analysis             | 3.9 years     | OR 0.99 (95% CI 0.86 – 1.16)                                                                            | Yes |
|                               | [33] Sayal (2007)        | UK (257)                                                                 | 10% with highest problem scores, Strengths & Difficulties Questionnaire (SDQ) teacher report <i>Conduct problems</i> | Parent report used in analysis instead | 7.75- 9 years | OR 1.41 (95% CI 1.02– 1.94)                                                                             | Yes |
|                               | [33] Sayal (2007)        | UK (525)                                                                 | 10% with highest problem scores, Strengths & Difficulties Questionnaire (SDQ) teacher report <i>Hyperactivity</i>    | Parent report used in analysis instead | 7.75- 9 years | OR 1.20 (95% CI 0.96– 1.51)                                                                             | Yes |
|                               | [46] Parry (1992)        | Netherlands, Scotland, France, Spain, Denmark, Germany, Portugal (8,453) | Mental Development Index, Bayley Scales of Infant Development                                                        | No SE/SD reported for reference group  | 18 months     | Mean increase of 1.80 points (SE 1.1) for those exposed compared to unexposed.                          | Yes |
|                               | [46] Parry (1992)        | Netherlands, Scotland, France, Spain, Denmark, Germany, Portugal (8,453) | Psychomotor Development Index, Bayley Scales of Infant Development                                                   | No SE/SD reported for reference group  | 18 months     | Mean increase of 0.81 points (se 0.8) for those exposed compared to unexposed.                          | Yes |
| <b>Cognition</b>              | [22] Sayal (2013)        | UK (10,558)                                                              | Key Stage 2 scores                                                                                                   | Only study with this outcome           | 11 years      | Mean increase of 0.38 (95% CI -0.02 – 0.78) on KS2 score for those exposed compared to unexposed.       | Yes |
|                               | [23] Alati (2008)        | UK (4,332)                                                               | IQ, Weschler Intelligence Scale for Children (WISC-III)                                                              | Only study with this outcome           | 8 years       | Mean IQ score 106.4 (SD 16.3) in those exposed, compared to 105.7 (SD 16.2) in those unexposed, p=0.10. | No  |

[1] Odds Ratio results compare the odds of outcome in those exposed to  $\leq 32g$  AA per week. SE: Standard error SD: standard deviation SGA: small for gestation age IQ: intelligence quotient.

1  
2  
3  
4  
5  
6  
7  
8  
9  
10  
11  
12  
13  
14  
15  
16  
17  
18  
19  
20  
21  
22  
23  
24  
25  
26  
27  
28  
29  
30  
31  
32  
33  
34  
35  
36  
37  
38  
39  
40  
41  
42  
43  
44  
45  
46  
47  
48  
49

For peer review only

Table 3. Quasi-experimental studies examining the effects of prenatal alcohol exposure on pregnancy outcomes.

| Study (year)      | Country | Total Number | Study type                   | Gene | SNP-rs number | Age at outcome assessment (child) | Outcomes                                                | Summary of results & conclusions as presented in the paper                                                                                                                                               | Limitations                                                                                            |
|-------------------|---------|--------------|------------------------------|------|---------------|-----------------------------------|---------------------------------------------------------|----------------------------------------------------------------------------------------------------------------------------------------------------------------------------------------------------------|--------------------------------------------------------------------------------------------------------|
| [25] Alati (2013) | UK      | 7,062        | Maternal-paternal comparison | na   | na            | 11 years                          | Academic achievement: Key Stage 2 scores (standardised) | Maternal alcohol consumption abstainers: mean 102.0 (SD 9.1); <1 glass/week: mean 102.8 (SD 8.7)<br>Paternal alcohol consumption abstainers: mean 98.9 (SD 11); <1 glass/week: mean 101.1 (SD 9.1)       | Different confounding structures for the association of maternal vs. paternal alcohol with the outcome |
| [23] Alati (2008) | UK      | 4,332        | Maternal-paternal comparison | na   | na            | 8 years                           | IQ: Wechsler Intelligence Scale for Children (WISC)     | Maternal alcohol consumption abstainers: mean 105.7 (SD 16.2); <1 glass/week: mean 106.4 (SD 16.3)<br>Paternal alcohol consumption abstainers: mean 102.2 (SD 16.8); <1 glass/week: mean 104.0 (SD 16.7) | Different confounding structures for the association of maternal vs. paternal alcohol with the outcome |

Abbreviations: OR: Odds ratio CI: Confidence intervals MD: Mean difference SD: standard deviation IQ: Intelligence quotient.



## Discussion

Main findings: In this comprehensive systematic review of the literature on the effects of low levels of alcohol drinking in pregnancy, the two main findings are: i) a surprisingly limited number of prospective studies specifically addressing the question of whether light maternal alcohol consumption (i.e. up to 32g/week (or 4 UK units) has any causal effect (adverse or beneficial) on infant and later offspring outcomes and pregnancy outcomes, and, as a result, ii) a paucity of evidence demonstrating a clear detrimental effect, or safe limit, of light alcohol consumption on outcomes. The upper limit that we chose to examine here is that of the current version of the UK National Institute for Health and Care Excellence (NICE) guidelines.[47] The question we have attempted to address is very important given the mixed advice that women are given with regards to whether they should abstain completely or be allowed light alcohol consumption in pregnancy. The lack of research evidence to address this question is notable.

Strengths and limitations: Strengths of this review include the completeness of searches with a focused research question aimed at informing alcohol in pregnancy guidelines. In addition to observational studies' biases minimised by only including those with prospective assessment of exposure and prioritising results adjusted for main confounders. Another strength of this review is the unique effort to include alternative study designs to further improve causal inference alongside standard analytical approaches. The main limitation of results on the effects of light drinking in pregnancy from standard analytical approaches is bias due to residual confounding. SE position is a complex, multi-faceted entity. Several studies have attempted to adjust for SE position by collecting information on, for example, maternal education, family-level SE position around the time of the pregnancy, home address-based deprivation index etc. Few studies included more than one of these measured [22 29-31]. Whereas we consider attempting to adjust for at least one of these characteristics to be a minimum requirement to account for some of the confounding introduced by SE position, there remains scope for residual confounding.[48] Given the

1  
2  
3 strong relationship between SE position and both the exposure (alcohol use in pregnancy)  
4 and outcomes in this review, any degree of residual confounding is of course an issue when  
5 interpreting the effect estimates from the observational studies included in this review.  
6  
7

8  
9 Women who drink low amounts of alcohol may be more likely to be of higher socio-  
10 economic position, compared to abstainers, at least in developed settings in recent  
11 years,[49] and both of these characteristics are associated with better pregnancy and  
12 cognitive outcomes.[50] Maternal smoking and ethnicity are also known correlates of  
13 maternal alcohol use, and risk factors for e.g. low birth weight.[51] Most studies included in  
14 this review adjusted for at least some of these factors. However, due to the small number of  
15 studies included for any given outcome, it was impossible to formally investigate the effect of  
16 incomplete adjustment for some (or all) of these confounders. Additionally, for most  
17 outcomes, we could not pool eligible studies for various reasons (e.g. too few studies, lack of  
18 standard errors) and that we limited our review to a number of pre-specified outcomes  
19 including the most common pregnancy-related outcomes and childhood outcomes related to  
20 FASD. This also was the case for identifying effects based on time of exposure, which is  
21 also a limitation.  
22  
23  
24  
25  
26  
27  
28  
29  
30  
31  
32  
33  
34

35 The inclusion of only English language studies may have led to missing some studies,  
36 however there is little evidence that exclusion of non-English language studies leads to  
37 systematic bias in systematic reviews of conventional medicine.[52-55]  
38  
39  
40  
41  
42

43 Interpretation: This review demonstrates the paucity and poor quality of evidence addressing  
44 this important public health question, and the difficulty of designing studies that can  
45 effectively evaluate the causal impact of low alcohol consumption whilst minimising bias and  
46 confounding. It also shows the value of reporting measures of effect for meaningful  
47 categories of the exposure. Whilst many studies reported that associations did not differ from  
48 linearity prior to providing a single coefficient for the dose-response association, it is possible  
49 that statistical power limited the ability to detect non-linear associations in single studies.  
50  
51  
52  
53  
54  
55  
56  
57  
58  
59  
60

1  
2  
3 Such detail is especially important when there are controversies about the shape of the  
4 association of interest (linear, U or J-shaped) and/or the existence of safe thresholds.

5  
6 Outstanding questions also remain about the effects of maternal alcohol consumption at  
7 different stages of conception and pregnancy. Alternative analytical approaches such as  
8 sibling comparisons[56] and the use of instrumental variable approaches[57] as well as  
9 triangulating the totality of evidence from multiple study types[58] (formally or informally) are  
10 needed in order to strengthen confidence in the direction and size of any potential causal  
11 relationships.  
12

13  
14 The recently proposed change in the guidelines for alcohol use in pregnancy in the UK to  
15 complete abstinence, would be an application of the precautionary principle. This review  
16 confirmed some increased risk of babies being born SGA but little direct evidence of any  
17 other detrimental effect for maternal drinking up to 32g/week. However, there have been few  
18 well-conducted studies examining this specific category of exposure. This issue remains of  
19 great public health importance, with alcohol consumption during pregnancy prevalent in the  
20 UK, Ireland, New Zealand and Australia with up to 80% of women consuming some alcohol  
21 during pregnancy.[59] For some, the evidence of the potential for harm – mostly coming from  
22 animal experiments and human studies of effects due to higher levels of exposure will be  
23 sufficient to advocate that guidelines should advise women to avoid all alcohol in pregnancy,  
24 while others will wish to retain the existing wording of guidelines.[60] Here we found that  
25 maternal alcohol consumption of up to 32g/week was associated with an 10% increased risk  
26 of preterm birth (95%CI: 0·95 to1·28). In comparison, light to moderate smoking (<20  
27 cigarettes per day) is associated with a 22% increased risk of preterm birth (95% CI: 1·13 to  
28 1·32).[61]  
29

30  
31 In conclusion, we found limited evidence for a causal role of light drinking in pregnancy,  
32 compared to abstaining, on most of the outcomes examined. Despite the distinction between  
33 light drinking and abstinence being the point of most tension and confusion for health  
34 professionals and pregnant women and contributing to inconsistent guidance and advice  
35  
36  
37  
38  
39  
40  
41  
42  
43  
44  
45  
46  
47  
48  
49  
50  
51  
52  
53  
54  
55  
56  
57  
58  
59  
60

1  
2  
3 now and in the past, our extensive review shows that this specific question is not being  
4 researched thoroughly enough, if at all. In addition, there has been no evidence regarding  
5 possible benefits of light alcohol consumption versus absence. Further studies, including  
6 those using designs that improve causal inference, are required to provide further evidence  
7 and a better estimation of the likely effects. Formulating guidance on the basis of the current  
8 evidence is challenging. However, describing the paucity of current research and explaining  
9 that “absence of evidence is not evidence of absence”, appears warranted.  
10  
11  
12  
13  
14  
15  
16  
17  
18  
19  
20  
21  
22  
23  
24  
25  
26  
27  
28  
29  
30  
31  
32  
33  
34  
35  
36  
37  
38  
39  
40  
41  
42  
43  
44  
45  
46  
47  
48  
49  
50  
51  
52  
53  
54  
55  
56  
57  
58  
59  
60

## Acknowledgments

We thank our colleagues from NIHR CLAHRC West who provided support that greatly assisted the research. We thank Louise Waters for assistance with article collection and Alison Richards for developing the search strategy for this review.

## Details of contributors

Loubaba Mamluk: Drafting the protocol, preparing the data extraction database, data screening and collection (lead reviewer), data analysis, figures, tables, data interpretation, and drafting the manuscript. Hannah B Edwards: screening, data collection, data quality checking, data interpretation, and preparation of final manuscript. Theresa HM Moore: Advising on the protocol, preparing the protocol, screening title and abstract. Timothy Jones: Data extraction and full text screening. Sharea Ijaz: Abstract and full text screening. Jelena Savović: protocol development/study design (including the development of searching, article screening and data collection strategies), oversaw and managed the review process and the review team, provided methodological advice for the review and meta-analysis conduct, and critically revised the manuscript. George Davey Smith: Obtained funding, formulation of project plan, review of progress and of the manuscript. Jenny L. Donovan: Obtained funding and contributed to drafting the manuscript, and approved the final version. Verity Leach: Data extraction. Deborah Lawlor: contributed to the study design, data interpretation and review of earlier manuscript drafts; she approved the final version that has been submitted. Sarah J. Lewis: contributed to the study design, data interpretation and review of earlier manuscript drafts; she approved the final version that has been submitted. Abigail Fraser: Contributed to the study design, data analysis and interpretation and drafting of manuscript. Luisa Zuccolo: Contributed to the study design, data analysis and interpretation and drafting of manuscript. I, Loubaba Mamluk, the corresponding author of this manuscript, certify that I have full access to all the data in the study and had final responsibility for the decision to submit for publication.

## Transparency declaration

I, Loubaba Mamluk, the corresponding author of this manuscript, affirm that this manuscript is an honest, accurate, and transparent account of the study being reported; that no important aspects of the study have been omitted; and that any discrepancies from the study as planned (and, if relevant, registered) have been explained.

## Conflict of interest:

The authors have nothing to disclose.

1  
2  
3 This work has not been submitted for publication elsewhere.  
4  
5

### 6 **Disclosure**

7 All authors have completed the ICMJE uniform disclosure form  
8 at [www.icmje.org/coi\\_disclosure.pdf](http://www.icmje.org/coi_disclosure.pdf) and declare: no support from any organisation for the  
9 submitted work; no financial relationships with any organisations that might have an interest  
10 in the submitted work in the previous three years; no other relationships or activities that  
11 could appear to have influenced the submitted work.  
12  
13  
14  
15

### 16 **Role of funding source**

17 The UK Medical Research Council (MC\_UU\_12013/1 and MC\_UU\_12013/5) and the  
18 University of Bristol provide core funding for the MRC Integrative Epidemiology Unit; LM,  
19 DAL, GDS, AF, and LZ are partially or fully funded through this. AF and LZ are UK Medical  
20 Research Council research fellowships (Grant refs: MR/M009351/1 and G0902144,  
21 respectively). LM, JS, HE, VL, TJ, SI, TM and JLD are fully or partially partly funded by  
22 National Institute for Health Research (NIHR) Collaboration for Leadership in Applied Health  
23 Research and Care West (CLAHRC West) at University Hospitals Bristol NHS Foundation  
24 Trust. DAL (NF-SI-0611-10196) and JLD (NF-SI-0512-10119) are NIHR Senior  
25 Investigators. SL is a senior lecturer funded by HEFCE. The views expressed here are those  
26 of the author(s) and not necessarily those of the NHS, the MRC, NIHR or the Department of  
27 Health. I, Loubaba Mamluk, the corresponding author of this manuscript, certify that I have  
28 full access to all the data in the study and had final responsibility for the decision to submit  
29 for publication.  
30  
31  
32  
33  
34  
35  
36  
37  
38  
39

### 40 **Transparency declaration**

41 The lead author (Loubaba Mamluk) affirms that this manuscript is an honest, accurate, and  
42 transparent account of the study being reported; that no important aspects of the study have  
43 been omitted; and that any discrepancies from the study as planned (and, if relevant,  
44 registered) have been explained.  
45  
46  
47

### 48 **Data sharing Statement**

49 NA  
50  
51  
52  
53  
54  
55  
56  
57  
58  
59  
60

## References

1. Streissguth AP, Landesman-Dwyer S, Martin JC, Smith DW. Teratogenic effects of alcohol in humans and laboratory animals. *Science (New York, N.Y.)* 1980;**209**(4454):353-61
2. Popova S, Lange S, Shield K, et al. Comorbidity of fetal alcohol spectrum disorder: a systematic review and meta-analysis. *Lancet (London, England)* 2016;**387**(10022):978-87 doi: 10.1016/s0140-6736(15)01345-8[published Online First: Epub Date]].
3. Chudley AE, Conry J, Cook JL, Loock C, Rosales T, LeBlanc N. Fetal alcohol spectrum disorder: Canadian guidelines for diagnosis. *CMAJ : Canadian Medical Association journal = journal de l'Association medicale canadienne* 2005;**172**(5 Suppl):S1-s21 doi: 10.1503/cmaj.1040302[published Online First: Epub Date]].
4. International Alliance for Responsible Drinking- Drinking guidelines for pregnancy and breast feeding. 2016
5. (NICE) NIFHACE. Antenatal care. CG62. NICE 2008
6. Department of Health. Alcohol Guidelines Review – Report from the Guidelines development group to the UK Chief Medical Officers. 2016
7. Moher D, Liberati A, Tetzlaff J, Altman DG. Preferred reporting items for systematic reviews and meta-analyses: the PRISMA statement. *Annals of internal medicine* 2009;**151**(4):264-69
8. Hamlyn B OK, Wands S. *Infant Feeding 2000*. London: The Stationery Office, 2002.
9. Henderson J, Gray R, Brocklehurst P. Systematic review of effects of low–moderate prenatal alcohol exposure on pregnancy outcome. *Bjog* 2007;**114**(3):243-52
10. Patra J, Bakker R, Irving H, Jaddoe VW, Malini S, Rehm J. Dose–response relationship between alcohol consumption before and during pregnancy and the risks of low birthweight, preterm birth and small for gestational age (SGA)—a systematic review and meta-analyses. *Bjog* 2011;**118**(12):1411-21
11. Dissemination CfRa. CRD’s guidance for undertaking reviews in health care. York Publishing Services Ltd 2009:32
12. Becker HC, Diaz-Granados JL, Randall CL. Teratogenic actions of ethanol in the mouse: a minireview. *Pharmacology Biochemistry and Behavior* 1996;**55**(4):501-13
13. Haycock PC. Fetal Alcohol Spectrum Disorders: The Epigenetic Perspective 1. *Biology of reproduction* 2009;**81**(4):607-17
14. Higgins J, Green S. *Cochrane handbook for systematic reviews of interventions version 5.1. 0 [updated Mar 2011]*. The Cochrane collaboration. 2011, 2012.
15. Wells G, Shea B, O'Connell D, et al. The Newcastle-Ottawa Scale (NOS) for assessing the quality of nonrandomised studies in meta-analyses. [http://www.ohri.ca/programs/clinical\\_epidemiology/oxford.asp](http://www.ohri.ca/programs/clinical_epidemiology/oxford.asp). Accessed March 2017
16. Moher D, Liberati A, Tetzlaff J, Altman DG. Preferred reporting items for systematic reviews and meta-analyses: the PRISMA statement. *PLoS medicine* 2009;**6**(7):e1000097 doi: 10.1371/journal.pmed.1000097[published Online First: Epub Date]].
17. Stroup DF, Berlin JA, Morton SC, et al. Meta-analysis of observational studies in epidemiology: a proposal for reporting. Meta-analysis Of Observational Studies in Epidemiology (MOOSE) group. *Jama* 2000;**283**(15):2008-12
18. Sterne JA, Sutton AJ, Ioannidis JP, et al. Recommendations for examining and interpreting funnel plot asymmetry in meta-analyses of randomised controlled trials. *Bmj* 2011;**343**:d4002
19. StataCorp. *Stata Statistical Software: release 12*. College Station TSL, 2015.
20. Peacock JL, Bland JM, Anderson HR. Preterm delivery: effects of socioeconomic factors, psychological stress, smoking, alcohol, and caffeine. *Bmj* 1995;**311**(7004):531-5
21. Salihu HM, Kornosky JL, Lynch O, Alio AP, August EM, Marty PJ. Impact of prenatal alcohol consumption on placenta-associated syndromes. *Alcohol* 2011;**45**(1):73-9 doi: <http://dx.doi.org/10.1016/j.alcohol.2010.05.010>[published Online First: Epub Date]].



- 1
  - 2
  - 3
  - 4
  - 5
  - 6
  - 7
  - 8
  - 9
  - 10
  - 11
  - 12
  - 13
  - 14
  - 15
  - 16
  - 17
  - 18
  - 19
  - 20
  - 21
  - 22
  - 23
  - 24
  - 25
  - 26
  - 27
  - 28
  - 29
  - 30
  - 31
  - 32
  - 33
  - 34
  - 35
  - 36
  - 37
  - 38
  - 39
  - 40
  - 41
  - 42
  - 43
  - 44
  - 45
  - 46
  - 47
  - 48
  - 49
  - 50
  - 51
  - 52
  - 53
  - 54
  - 55
  - 56
  - 57
  - 58
  - 59
  - 60
22. Sayal K, Draper ES, Fraser R, Barrow M, Davey Smith G, Gray R. Light drinking in pregnancy and mid-childhood mental health and learning outcomes. *Arch Dis Child* 2013;**98**(2):107-11 doi: <http://dx.doi.org/10.1136/archdischild-2012-302436>[published Online First: Epub Date]].
23. Alati R, Macleod J, Hickman M, et al. Intrauterine exposure to alcohol and tobacco use and childhood IQ: findings from a parental-offspring comparison within the Avon Longitudinal Study of Parents and Children. *Pediatr Res* 2008;**64**(6):659-66 doi: <http://dx.doi.org/10.1203/PDR.0b013e318187cc31>[published Online First: Epub Date]].
24. Lipsitch M, Tchetgen ET, Cohen T. Negative controls: a tool for detecting confounding and bias in observational studies. *Epidemiology (Cambridge, Mass.)* 2010;**21**(3):383
25. Alati R, Davey Smith G, Lewis SJ, et al. Effect of prenatal alcohol exposure on childhood academic outcomes: contrasting maternal and paternal associations in the ALSPAC study. *PLoS ONE* 2013;**8**(10):e74844 doi: <http://dx.doi.org/10.1371/journal.pone.0074844>[published Online First: Epub Date]].
26. Lundsberg LS, Illuzzi JL, Belanger K, Triche EW, Bracken MB. Low-to-moderate prenatal alcohol consumption and the risk of selected birth outcomes: a prospective cohort study. *Ann Epidemiol* 2015;**25**(1):46-54.e3 doi: <http://dx.doi.org/10.1016/j.annepidem.2014.10.011>[published Online First: Epub Date]].
27. Nykjaer C, Alwan NA, Greenwood DC, et al. Maternal alcohol intake prior to and during pregnancy and risk of adverse birth outcomes: evidence from a British cohort. *J Epidemiol Community Health* 2014;**68**(6):542-9 doi: <http://dx.doi.org/10.1136/jech-2013-202934>[published Online First: Epub Date]].
28. Niclasen J, Nybo Andersen AM, Teasdale TW, Strandberg-Larsen K. Prenatal exposure to alcohol, and gender differences on child mental health at age seven years. *J Epidemiol Community Health* 2014;**68**(3):224-32 doi: <http://dx.doi.org/10.1136/jech-2013-202956>[published Online First: Epub Date]].
29. Miyake Y, Tanaka K, Okubo H, Sasaki S, Arakawa M. Alcohol consumption during pregnancy and birth outcomes: the Kyushu Okinawa Maternal and Child Health Study. *BMC Pregnancy Childbirth* 2014;**14**:79 doi: <http://dx.doi.org/10.1186/1471-2393-14-79>[published Online First: Epub Date]].
30. McCarthy FP, O'Keeffe LM, Khashan AS, et al. Association between maternal alcohol consumption in early pregnancy and pregnancy outcomes. *Obstetrics & Gynecology* 2013;**122**(4):830-37
31. Robinson M, Oddy WH, McLean NJ, et al. Low-moderate prenatal alcohol exposure and risk to child behavioural development: a prospective cohort study. *Bjog* 2010;**117**(9):1139-50 doi: <http://dx.doi.org/10.1111/j.1471-0528.2010.02596.x>[published Online First: Epub Date]].
32. Jaddoe VW, Bakker R, Hofman A, et al. Moderate alcohol consumption during pregnancy and the risk of low birth weight and preterm birth. The generation R study. *Ann Epidemiol* 2007;**17**(10):834-40
33. Sayal K, Heron J, Golding J, Emond A. Prenatal alcohol exposure and gender differences in childhood mental health problems: a longitudinal population-based study. *Pediatrics* 2007;**119**(2):e426-34
34. Albertsen K, Andersen AM, Olsen J, Gronbaek M. Alcohol consumption during pregnancy and the risk of preterm delivery. *Am J Epidemiol* 2004;**159**(2):155-61
35. Lundsberg LS, Bracken MB, Saftlas AF. Low-to-moderate gestational alcohol use and intrauterine growth retardation, low birthweight, and preterm delivery. *Ann Epidemiol* 1997;**7**(7):498-508
36. Passaro KT, Little RE, Savitz DA, Noss J. The effect of maternal drinking before conception and in early pregnancy on infant birthweight. The ALSPAC Study Team. *Avon Longitudinal Study of Pregnancy and Childhood. Epidemiology* 1996;**7**(4):377-83



- 1  
2  
3 37. Shu XO, Hatch MC, Mills J, Clemens J, Susser M. Maternal smoking, alcohol drinking, caffeine  
4 consumption, and fetal growth: results from a prospective study. *Epidemiology*  
5 1995;**6**(2):115-20  
6  
7 38. Olsen J, Pereira AdC, Olsen SF. Does maternal tobacco smoking modify the effect of alcohol on  
8 fetal growth? *American journal of public health* 1991;**81**(1):69-73  
9  
10 39. Brooke OG, Anderson HR, Bland JM, Peacock JL, Stewart CM. Effects on birth weight of smoking,  
11 alcohol, caffeine, socioeconomic factors, and psychosocial stress. *Bmj* 1989;**298**(6676):795-  
12 801  
13  
14 40. Andersen A-MN, Andersen PK, Olsen J, Grønbaek M, Strandberg-Larsen K. Moderate alcohol  
15 intake during pregnancy and risk of fetal death. *Int J Epidemiol* 2012;**41**(2):405-13  
16  
17 41. Windham GC, Von Behren J, Fenster L, Schaefer C, Swan SH. Moderate maternal alcohol  
18 consumption and risk of spontaneous abortion. *Epidemiology* 1997;**8**(5):509-14  
19  
20 42. Ogston SA, Parry GJ. EUROMAC. A European concerted action: maternal alcohol consumption  
21 and its relation to the outcome of pregnancy and child development at 18 months. Results--  
22 strategy of analysis and analysis of pregnancy outcome. *Int J Epidemiol* 1992;**21 Suppl 1**:S45-  
23 71  
24  
25 43. Bille C, Olsen J, Vach W, et al. Oral clefts and life style factors--a case-cohort study based on  
26 prospective Danish data. *Eur J Epidemiol* 2007;**22**(3):173-81  
27  
28 44. Ernhart CB, Sokol RJ, Ager JW, Morrow-Tlucak M, Martier S. Alcohol-related birth defects:  
29 assessing the risk. *Ann N Y Acad Sci* 1989;**562**:159-72  
30  
31 45. Faebo Larsen R, Hvas Mortensen L, Martinussen T, Nybo Andersen AM. Determinants of  
32 developmental coordination disorder in 7-year-old children: a study of children in the Danish  
33 National Birth Cohort. *Dev Med Child Neurol* 2013;**55**(11):1016-22 doi:  
34 <http://dx.doi.org/10.1111/dmcn.12223>[published Online First: Epub Date]].  
35  
36 46. Parry GJ, Ogston SA. EUROMAC. A European concerted action: maternal alcohol consumption  
37 and its relation to the outcome of pregnancy and child development at 18 months. Results--  
38 child development at age 18 months. *Int J Epidemiol* 1992;**21 Suppl 1**:S72-8  
39  
40 47. NHS Choices.Can I drink alcohol if I'm pregnant?  
41 [www.nhs.uk/chq/Pages/2270.aspx?CategoryID=54#close](http://www.nhs.uk/chq/Pages/2270.aspx?CategoryID=54#close). 2014  
42  
43 48. Galobardes B, Shaw M, Lawlor DA, Lynch JW, Smith GD. Indicators of socioeconomic position  
44 (part 1). *Journal of epidemiology and community health* 2006;**60**(1):7-12  
45  
46 49. Kelly Y, Sacker A, Gray R, Kelly J, Wolke D, Quigley MA. Light drinking in pregnancy, a risk for  
47 behavioural problems and cognitive deficits at 3 years of age? *Int J Epidemiol*  
48 2009;**38**(1):129-40 doi: <http://dx.doi.org/10.1093/ije/dyn230>[published  
49 Online First: Epub  
50 Date]].  
51  
52 50. Bradley RH, Corwyn RF. Socioeconomic status and child development. *Annual review of*  
53 *psychology* 2002;**53**(1):371-99  
54  
55 51. Phung H, Bauman A, Nguyen T, Young L, Tran M, Hillman K. Risk factors for low birth weight in a  
56 socio-economically disadvantaged population: parity, marital status, ethnicity and cigarette  
57 smoking. *Eur J Epidemiol* 2003;**18**(3):235-43  
58  
59 52. Morrison A, Polisena J, Husereau D, et al. The effect of English-language restriction on systematic  
60 review-based meta-analyses: a systematic review of empirical studies. *International journal of  
technology assessment in health care* 2012;**28**(02):138-44  
61  
62 53. Moher D, Pham B, Lawson M, Klassen T. The inclusion of reports of randomised trials published  
63 in languages other than English in systematic reviews. *Health Technol Assess* 2003;**7**(41):1-  
64 90  
65  
66 54. Klassen TP, Lawson ML, Moher D. Language of publication restrictions in systematic reviews gave  
67 different results depending on whether the intervention was conventional or  
68 complementary. *Journal of clinical epidemiology* 2005;**58**(8):769-76. e2  
69  
70 55. Jüni P, Holenstein F, Sterne J, Bartlett C, Egger M. Direction and impact of language bias in meta-  
71 analyses of controlled trials: empirical study. *Int J Epidemiol* 2002;**31**(1):115-23

- 1  
2  
3 56. Richmond RC, Al-Amin A, Smith GD, Relton CL. Approaches for drawing causal inferences from  
4 epidemiological birth cohorts: a review. *Early human development* 2014;**90**(11):769-80 doi:  
5 10.1016/j.earlhumdev.2014.08.023[published Online First: Epub Date]].  
6  
7 57. Burgess S, Davies NM, Thompson SG. Instrumental variable analysis with a nonlinear exposure-  
8 outcome relationship. *Epidemiology* 2014;**25**(6):877-85 doi:  
9 10.1097/ede.000000000000161[published Online First: Epub Date]].  
10  
11 58. Ades A, Sutton A. Multiparameter evidence synthesis in epidemiology and medical decision-  
12 making: current approaches. *Journal of the Royal Statistical Society: Series A (Statistics in*  
13 *Society)* 2006;**169**(1):5-35  
14  
15 59. O'Keeffe LM, Kearney PM, McCarthy FP, et al. Prevalence and predictors of alcohol use during  
16 pregnancy: findings from international multicentre cohort studies. *BMJ open*  
17 2015;**5**(7):e006323  
18  
19 60. Mather M, Wiles K, O'Brien P. Should women abstain from alcohol throughout pregnancy? 2015  
20  
21 61. Shah NR, Bracken MB. A systematic review and meta-analysis of prospective studies on the  
22 association between maternal cigarette smoking and preterm delivery. *American journal of*  
23 *obstetrics and gynecology* 2000;**182**(2):465-72  
24  
25  
26  
27  
28  
29  
30  
31  
32  
33  
34  
35  
36  
37  
38  
39  
40  
41  
42  
43  
44  
45  
46  
47  
48  
49  
50  
51  
52  
53  
54  
55  
56  
57  
58  
59  
60

peer review only

1  
2  
3 **Figure 1.** Flowchart of search strategy including primary reasons for article exclusion.  
4

5 **Figure 2.** Pooled mean difference for birthweight comparing low alcohol consumption (up to  
6 32g/week) with no alcohol consumption (7 studies). 'Adjusted' refers to adjusted for both smoking  
7 and a measure of socio-economic status. CI: Confidence intervals.  
8

9 **Figure 3a)** Odd Ratios for preterm birth comparing low alcohol consumption (up to 32g/week) with  
10 no alcohol consumption (9 studies); **3b)** Odd Ratios for small for gestational age comparing low  
11 alcohol consumption (up to 32g/week) with no alcohol consumption (7 studies) **3c)** Odd Ratios for  
12 low birthweight comparing low alcohol consumption (up to 32g/week) with no alcohol consumption  
13 (6 studies). OR: Odds ratio, CI: Confidence intervals. Pooled OR includes both adjusted and  
14 unadjusted estimates from studies, 'Adjusted' refers to adjusted for both smoking and a measure of  
15 socio-economic status.  
16  
17  
18

19 **Supplementary figure 1a)** Odds ratios for externalising behaviour comparing low alcohol  
20 consumption (up to 32g/week) with no alcohol consumption (3 studies); **1b)** Odds ratios for  
21 internalising behaviour comparing low alcohol consumption (up to 32g/week) with no alcohol  
22 consumption (2 studies); OR: Odds ratio, CI: Confidence intervals.  
23  
24  
25  
26  
27  
28  
29  
30  
31  
32  
33  
34  
35  
36  
37  
38  
39  
40  
41  
42  
43  
44  
45  
46  
47  
48  
49  
50  
51  
52  
53  
54  
55  
56  
57  
58  
59  
60

1  
2  
3  
4  
5  
6  
7  
8  
9  
10  
11  
12  
13  
14  
15  
16  
17  
18  
19  
20  
21  
22  
23  
24  
25  
26  
27  
28  
29  
30  
31  
32  
33  
34  
35  
36  
37  
38  
39  
40  
41  
42  
43  
44  
45  
46  
47  
48  
49  
50  
51  
52  
53  
54  
55  
56  
57  
58  
59  
60

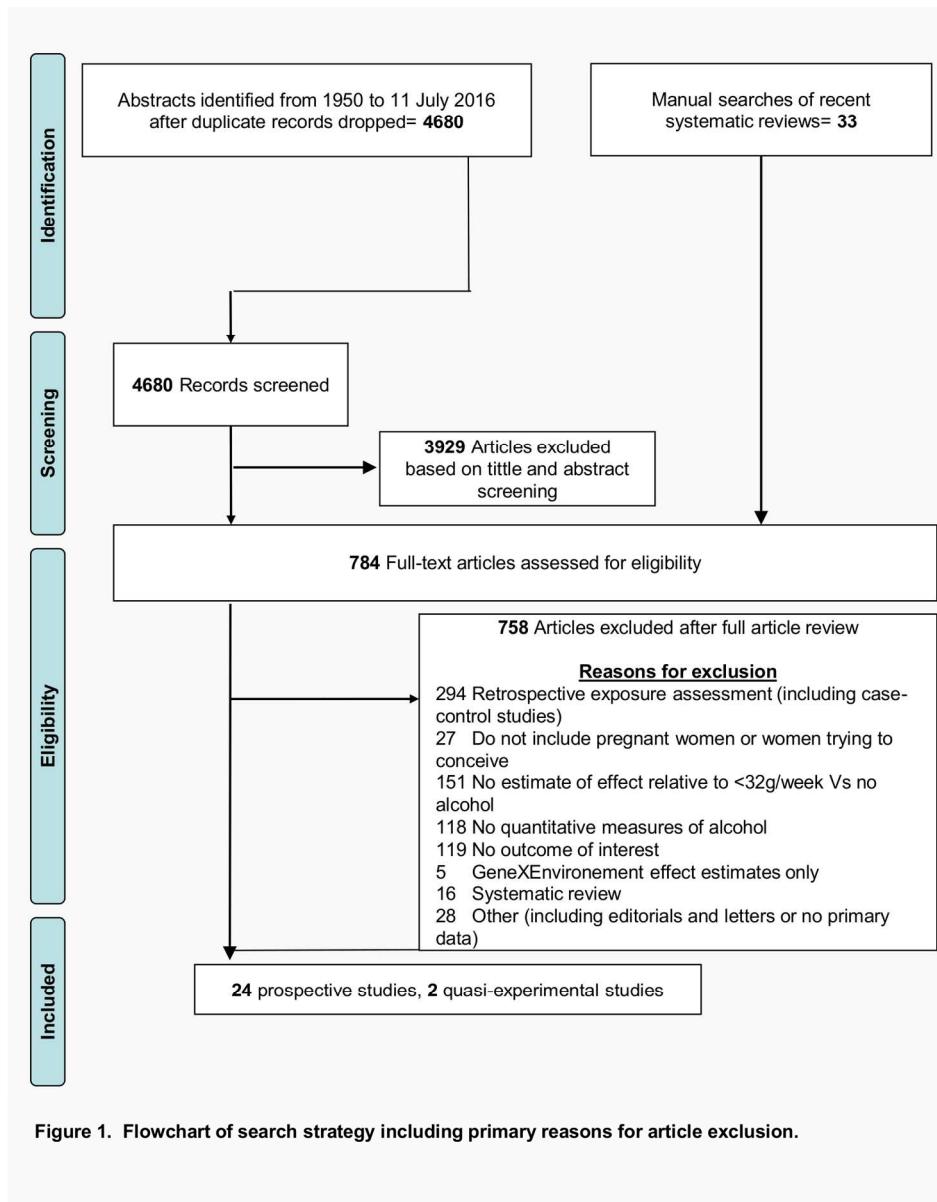

Figure 1. Flowchart of search strategy including primary reasons for article exclusion.

Figure 1. Flowchart of search strategy including primary reasons for article exclusion.

143x183mm (300 x 300 DPI)

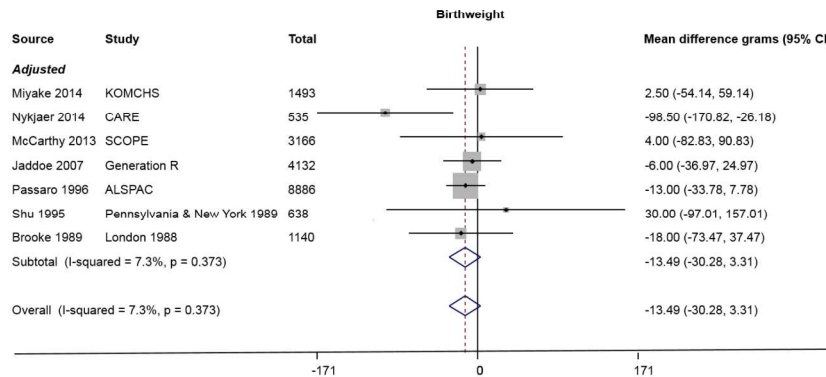

Figure 2. Pooled mean difference for birthweight comparing low alcohol consumption (up to 32g/week) with no alcohol consumption (7 studies). 'Adjusted' refers to adjusted for both smoking and a measure of socio-economic status. CI: Confidence intervals.

Figure 2. Pooled mean difference for birthweight comparing low alcohol consumption (up to 32g/week) with no alcohol consumption (7 studies). 'Adjusted' refers to adjusted for both smoking and a measure of socio-economic status. CI: Confidence intervals.

297x209mm (300 x 300 DPI)



Figure 3a) Odd Ratios for preterm birth comparing low alcohol consumption (up to 32g/week) with no alcohol consumption (9 studies); 3b) Odd Ratios for small for gestational age comparing low alcohol consumption (up to 32g/week) with no alcohol consumption (7 studies) 3c) Odd Ratios for low birthweight comparing low alcohol consumption (up to 32g/week) with no alcohol consumption (6 studies). OR: Odds ratio, CI: Confidence intervals. Pooled OR includes both adjusted and unadjusted estimates from studies, 'Adjusted' refers to adjusted for both smoking and a measure of socio-economic status.

Figure 3a) Odd Ratios for preterm birth comparing low alcohol consumption (up to 32g/week) with no alcohol consumption (9 studies); 3b) Odd Ratios for small for gestational age comparing low alcohol consumption (up to 32g/week) with no alcohol consumption (7 studies) 3c) Odd Ratios for low birthweight comparing low alcohol consumption (up to 32g/week) with no alcohol consumption (6 studies). OR: Odds ratio, CI: Confidence intervals. Pooled OR includes both adjusted and unadjusted estimates from studies, 'Adjusted' refers to adjusted for both smoking and a measure of socio-economic status.

297x209mm (300 x 300 DPI)

## PROSPERO International prospective register of systematic reviews

### Systematic review of the effects of low-moderate prenatal alcohol exposure on pregnancy and childhood outcomes

Loubaba Mamluk, Luisa Zuccolo, Theresa Moore, Alison Richards

#### Citation

Loubaba Mamluk, Luisa Zuccolo, Theresa Moore, Alison Richards. Systematic review of the effects of low-moderate prenatal alcohol exposure on pregnancy and childhood outcomes. PROSPERO 2015:CRD42015015941 Available from [http://www.crd.york.ac.uk/PROSPERO\\_REBRANDING/display\\_record.asp?ID=CRD42015015941](http://www.crd.york.ac.uk/PROSPERO_REBRANDING/display_record.asp?ID=CRD42015015941)

#### Review question(s)

To determine what is known about the effects of prenatal alcohol exposure, corresponding to low-to-moderate levels of maternal consumption, on pregnancy outcomes. These include pregnancy complications, delivery outcomes and Fetal Alcohol Syndrome (FAS) features. This will include the assessment of systematic reviews and meta-analyses. A particular focus will be placed on identifying practical and meaningful outcomes of alcohol toxicity during pregnancy.

#### Searches

Publications will be identified by searching the following major relevant databases: Medline, Embase, web of science and Psycinfo. All databases will be searched from inception. Internet searches will be carried out using Google Scholar. Attempts to identify further studies will be made by examining the reference lists of included studies and of previous reviews. All studies to be restricted to those published in the English language only.

#### Types of study to be included

1) Prospective studies and systematic reviews/meta-analyses of prospective studies (cohort or case-control studies nested in a cohort). 2) Natural experiments / studies using instrumental variables to improve casual inference, including Mendelian Randomization (MR) studies 3) Sibling comparison studies 4) Parental comparisons

#### Condition or domain being studied

Pregnancy and delivery outcomes as well as offspring outcomes (from the domains affected by Fetal Alcohol Syndrome (FAS))

#### Participants/ population

Pregnant women or women who are trying to become pregnant sampled from the general population. Cohorts of pregnant women with alcohol abuse/dependency will be excluded.

#### Intervention(s), exposure(s)

Inclusion: low-to-moderate levels of prenatal alcohol consumption (up to 10.4 UK units or 83 g/week).

Exclusion: studies will be excluded if there was no quantitative measure of alcohol consumption that could be converted to UK standard units or grams of alcohol and if there was insufficient data for an (adjusted and/or crude) effect measure of low-moderate consumption to be extracted. Cohorts of pregnant women with alcohol abuse/dependency will be excluded.

#### Comparator(s)/ control

women with no or very sporadic alcohol consumption in pregnancy.

#### Outcome(s)

##### Primary outcomes

Outcomes: (in both children and adults)

1  
2  
3 1) Pregnancy complications

- 4 - Intra uterine growth restrictions (IUGR)  
5  
6  
7 - Miscarriage  
8  
9 - Premature labour and birth- Gestational age  
10  
11 - Preeclampsia and gestational hypertension  
12  
13 - Low amniotic fluid (oligohydramnios)  
14  
15 - Gestational diabetes  
16  
17 - Placenta previa

18  
19 2) Delivery outcomes

- 20 - Birth weight/ low birth weight/ small for gestational age (SGA)  
21  
22 - Still birth  
23  
24 - Delivery intervention (including vacuum extraction, forceps delivery,  
25  
26 Caesarean section)  
27  
28 - Apgar score  
29

30 3) FAS features

- 31  
32 - Facial malformation  
33  
34 - Growth restrictions (height- measurements of growth restriction)  
35  
36 - Cranium size/ head circumference  
37  
38 - Developmental delays  
39  
40 - Behaviour complications  
41  
42 - Cognitive impairment / IQ  
43  
44 - Attention scores / Attention deficit and hyperactivity disorder (ADHD)

45 **Secondary outcomes**

46 none  
47

48 **Data extraction, (selection and coding)**

49 Selection of studies:

50  
51 Titles and abstracts will be screened independently by one reviewer (a random selection of 20% will also be screened  
52 by a second reviewer independently) with inclusion/exclusion being decided according to prespecified criteria.  
53 Discrepancies will be discussed and disagreements resolved through consensus. The full-text of each of the articles  
54 identified through screening of titles and abstracts will be obtained in order to determine their inclusion in the review.  
55  
56

57 Data extraction:  
58  
59  
60



Data extraction will be carried out using Microsoft Access. This will be piloted on a small selection of studies and adjusted as necessary. Relevant data will be documented from each identified study including information on study design and location, population characteristics, exposures studied (including timing of exposure), methods used to ascertain exposures, outcomes studied, method of outcome ascertainment (including person reporting the outcome, whether parent, teacher, health professional, researcher, child...), study results (from both unadjusted and fully adjusted regressions), statistical adjustments etc. Data extraction will be carried out independently by one reviewer and a random selection of 20% will be checked by a second reviewer. Discrepancies will be resolved through discussion or referral to a third reviewer. Where necessary, authors will be contacted for additional information.

### **Risk of bias (quality) assessment**

Studies that did not adjust for smoking and maternal education/social class as potential confounders in their final model will be considered to be of low evidence quality.

### **Strategy for data synthesis**

The impact of low-to-moderate alcohol use on pregnancy and related outcomes will be investigated using high-low methods of meta-analysis techniques; however, due to anticipated low number of studies for some outcomes, a formal meta-analysis may not be appropriate for some of the outcomes. Where meta-analysis is not possible, a narrative summary of findings will be carried out. Random-effect meta-analysis will be performed alongside fixed-effect in the presence of high levels of between-studies heterogeneity (measured through I<sup>2</sup>). Item response theory (IRT) will be used to combining results from different scales if required. The likelihood of small study bias deriving from publication bias will further be assessed through drawing funnel plots.

### **Analysis of subgroups or subsets**

Where the included number of studies in the meta-analysis is large enough, sub-group analyses will be performed for 1) studies adjusting for smoking and maternal education/social class; 2) studies reporting separately on the effects of alcohol use in different gestational periods; 3) studies using different exposure/outcome assessments.

### **Dissemination plans**

We anticipate dissemination to regional and national public health directors

### **Contact details for further information**

Dr Mamluk

MRC Integrative Epidemiology Unit

School of Social and Community Medicine

University of Bristol

Oakfield House

Oakfield Grove

Bristol BS8 2BN

United Kingdom

l.mamluk@bristol.ac.uk

### **Organisational affiliation of the review**

none

### **Review team**

Dr Loubaba Mamluk, University of Bristol, UK

Dr Luisa Zuccolo, University of Bristol, UK

Ms Theresa Moore, University of Bristol, UK

Ms Alison Richards, University of Bristol, UK

### Collaborators

Dr Luisa Zuccolo, University of Bristol, UK  
Dr Sarah Lewis, University of Bristol, UK  
Dr Abi Fraser, University of Bristol, UK  
Professor Jenny Donovan, University of Bristol, UK  
Professor George Davey Smith, University of Bristol, UK

### Anticipated or actual start date

12 January 2015

### Anticipated completion date

01 September 2015

### Funding sources/sponsors

National Institute of Health Research, Medical Research Council, University of Bristol. UK

### Conflicts of interest

None known

### Language

English

### Country

England

### Subject index terms status

Subject indexing assigned by CRD

### Subject index terms

Alcohol Drinking; Humans; Pregnancy Outcome; Prenatal Exposure Delayed Effects

### Stage of review

Ongoing

### Date of registration in PROSPERO

19 January 2015

### Date of publication of this revision

25 February 2015

### DOI

10.15124/CRD42015015941

### Stage of review at time of this submission

|                                                                 | Started | Completed |
|-----------------------------------------------------------------|---------|-----------|
| Preliminary searches                                            | No      | Yes       |
| Piloting of the study selection process                         | No      | Yes       |
| Formal screening of search results against eligibility criteria | No      | No        |
| Data extraction                                                 | No      | No        |
| Risk of bias (quality) assessment                               | No      | No        |
| Data analysis                                                   | No      | No        |

**PROSPERO**

**International prospective register of systematic reviews**

The information in this record has been provided by the named contact for this review. CRD has accepted this information in good faith and registered the review in PROSPERO. CRD bears no responsibility or liability for the content of this registration record, any associated files or external websites.

---

For peer review only

1  
2  
3  
4  
5  
6  
7  
8  
9  
10  
11  
12  
13  
14  
15  
16  
17  
18  
19  
20  
21  
22  
23  
24  
25  
26  
27  
28  
29  
30  
31  
32  
33  
34  
35  
36  
37  
38  
39  
40  
41  
42  
43  
44  
45  
46  
47  
48  
49  
50  
51  
52  
53  
54  
55  
56  
57  
58  
59  
60

**Supplementary Table 1.** Search Strategy 1950 to 11-07-2016. MEDLINE, PsycINFO, EMBASE on Ovid; the Cochrane Library including CENTRAL (the Cochrane Central Database of Controlled Trials) on Wiley Interscience; and Science Citation Index, Social Science Citation Index, on Web of Science.

---

- 1 exp pregnancy/ (719661)
- 2 Pregnant Women/ (5199)
- 3 preconception care/ or prenatal care/ (21644)
- 4 exp "embryonic and fetal development"/ (212127)
- 5 Fetus/ (68424)
- 6 exp Pregnancy Complications/ (343999)
- 7 (prepregnan\$ or conception or preconception or pregnan\$ or prenatal\$ or pre-natal\$ or f?etal or f?etus or in utero).ti,ab. (588557)
- 8 Maternal exposure/ (5534)
- 9 or/1-8 (1079283)
- 10 Ethanol/ (73449)
- 11 Alcohol dehydrogenase/ (5809)
- 12 Aldehyde Oxidoreductases/ (3672)
- 13 exp Drinking Behavior/ (57821)
- 14 Temperance/ (2430)
- 15 alcohol\$.ti. (106954)
- 16 (alcohol dehydrogenase or acetaldehyde dehydrogenase).ti,ab. (8557)
- 17 ((alcohol or alcoholic) adj3 (drink\$ or exposure or consumption or consume\$ or consuming or low or light or moderat\$ or abstin\$ or abstain\$)).ti,ab. (49470)
- 18 ((low or light or moderate or abstin\$ or abstain\$ or pattern\$ or behavior\$) adj3 drink\$).ti,ab. (10558)
- 19 (ADH1B\$ or teetotal\$ or temperance or nondrink\$ or non-drink\$).ti,ab. (3093)
- 20 Genome-Wide Association Study/ or Linkage Disequilibrium/ or genotype/ or phenotype/ or polymorphism, genetic/ or (polymorphism\$ or ((gene or genes or genetic or genotyp\$) adj3 (instrument\$ or variant\$ or variable\$ or variability or variabilities or variance\$))).ti,ab. (494904)
- 21 \*Alcohols/ or exp \*Alcohol-Related Disorders/ or (alcohol adj3 (misuse or "use" or abuse or addict\$ or dependence or response\$ or susceptibility)).ti,ab. (110843)
- 22 20 and 21 (3108)
- 23 or/10-19,22 (213050)

1  
2  
3 24 9 and 23 (11403)  
4 25 letter/ (861500)  
5 26 editorial/ (368458)  
6 27 news/ (166329)  
7 28 exp historical article/ (325965)  
8 29 Anecdotes as topic/ (4586)  
9 30 comment/ (610211)  
10 31 case report/ (1708277)  
11 32 (letter or comment\$.ti. (100442)  
12 33 or/25-32 (3417468)  
13 34 randomized controlled trial/ or Randomized Controlled Trials as Topic/ or random\$.ti,ab. (888907)  
14 35 33 not 34 (3386180)  
15 36 animals/ not humans/ (3889478)  
16 37 exp Animals, Laboratory/ (730783)  
17 38 exp Animal Experimentation/ (6477)  
18 39 exp Models, Animal/ not humans/ (310115)  
19 40 exp rodentia/ (2688128)  
20 41 (rat or rats or mouse or mice).ti. (1123907)  
21 42 or/35-41 (7849766)  
22 43 24 not 42 (6498)  
23 44 meta-analysis/ (52850)  
24 45 meta-analysis as topic/ (13933)  
25 46 (meta analy\$ or metaanaly\$ or metanaly\$ or meta regression).ti,ab. (72390)  
26 47 ((systematic\$ or evidence\$ or realist or narrative or literature) adj2 (review\$ or overview\$)).ti,ab.  
27 (171877)  
28 48 "review of reviews".ti,ab. (211)  
29 49 (reference list\$ or bibliograph\$ or hand search\$ or manual search\$ or relevant journals).ab.  
30 (27094)  
31 50 (search strategy or search criteria or systematic search or study selection or data extraction).ab.  
32 (28877)  
33 51 (search\$ adj4 literature).ab. (30686)  
34  
35  
36  
37  
38  
39  
40  
41  
42  
43  
44  
45  
46  
47

1  
2  
3 52 (medline or pubmed or cochrane or embase or psychlit or psyclit or psychinfo or cinahl or science  
4 Citation index or bids or cancerlit).ab. (95294)  
5  
6 53 cochrane.jw. (11053)  
7  
8 54 ((multiple treatment\$ or indirect or mixed) adj2 comparison).ti,ab. (991)  
9  
10 55 or/44-54 (293491)  
11  
12 56 43 and 55 (201)  
13  
14 57 epidemiologic studies/ (6077)  
15  
16 58 ep.fs. (1223653)  
17  
18 59 exp case control studies/ (691899)  
19  
20 60 exp cohort studies/ (1394149)  
21  
22 61 cross-sectional studies/ (185407)  
23  
24 62 Mendelian Randomization Analysis/ (229)  
25  
26 63 (case control or negative control).ti,ab. (93097)  
27  
28 64 (cohort adj (study or studies or analys\$)).ti,ab. (98537)  
29  
30 65 ((follow up or observational) adj (study or studies)).ti,ab. (87771)  
31  
32 66 ((longitudinal\$ or retrospectiv\$ or prospectiv\$) and (study or studies or studied or review\$ or  
33 analys\$ or cohort\$)).ti,ab. (870699)  
34  
35 67 cross sectional.ti,ab. (183479)  
36  
37 68 (mendel\$ or natural experiment\$).ti,ab. (11082)  
38  
39 69 ((family or sibling or population) adj3 (study or studies)).ti,ab. (115245)  
40  
41 70 or/57-69 (2937160)  
42  
43 71 exp guideline/ (25834)  
44  
45 72 guidelines as topic/ or practice guidelines as topic/ (114690)  
46  
47 73 guideline\$.mp. (291621)  
74 or/71-73 (291621)  
75 55 or 70 or 74 (3362878)  
76 43 and 75 (3349)  
77 limit 76 to english language (3096)  
78 ((smok\$ or drug\$ or tobacco or nicotine or cigarette\$ or substance\$ or methamphetamine\$  
or amphetamine\$ or cocaine\$ or heroin or cannabis or marijuana) not (alcohol or alcoholic or drink\$)).ti.  
(489662)

For peer review only

1  
2  
3  
4  
5  
6  
7  
8  
9  
10  
11  
12  
13  
14  
15  
16  
17  
18  
19  
20  
21  
22  
23  
24  
25  
26  
27  
28  
29  
30  
31  
32  
33  
34  
35  
36  
37  
38  
39  
40  
41  
42  
43  
44  
45  
46  
47

| Supplementary Table 2. Lists of confounders adjusted for by each study |                                                                                                                                                                                                                                                                                                                                                                                                                                                                                                                                                                                                                                                                    |
|------------------------------------------------------------------------|--------------------------------------------------------------------------------------------------------------------------------------------------------------------------------------------------------------------------------------------------------------------------------------------------------------------------------------------------------------------------------------------------------------------------------------------------------------------------------------------------------------------------------------------------------------------------------------------------------------------------------------------------------------------|
| Study (year)                                                           | Confounders                                                                                                                                                                                                                                                                                                                                                                                                                                                                                                                                                                                                                                                        |
| [26] Lundsberg (2015)                                                  | Parity, maternal age, education, BMI, marital status, ethnicity, caffeine, smoking, exercise, work, prenatal and multivitamin use, passive smoke exposure, marijuana use, cocaine use, study cohort, preterm labour, respiratory problem, infant gender, bleeding, nausea/vomiting, hypertension, incompetent cervix, placental problems, sexually transmitted disease, induction/augmentation, maternal asthma, gestational diabetes.                                                                                                                                                                                                                             |
| [27] Nykjaer (2014)                                                    | Maternal pre-pregnancy weight, height, age, parity, ethnicity, salivary cotinine levels, caffeine intake, education, energy intake, gestation and baby's sex                                                                                                                                                                                                                                                                                                                                                                                                                                                                                                       |
| [28] Niclasen (2014)                                                   | Parental smoking, parental education, parental pre-pregnancy psychiatric diagnoses, and maternal psychological well-being in pregnancy.                                                                                                                                                                                                                                                                                                                                                                                                                                                                                                                            |
| [29] Miyake (2014)                                                     | Low birth weight, preterm birth: maternal age, region of residence, number of children, family structure, maternal education, maternal employment, body mass index, maternal smoking during pregnancy, and baby's gender.<br>Small for gestational age: maternal age, region of residence, number of children, family structure, maternal education, maternal employment, body mass index, maternal smoking during pregnancy, gestational age, and baby's gender.                                                                                                                                                                                                  |
| [45] Faeco Larsen (2013)                                               | Sex, gestational age, intrauterine growth restriction, maternal age, mother's occupational status, maternal smoking (ever) in first trimester, amount of maternal smoking and alcohol consumption in first trimester.                                                                                                                                                                                                                                                                                                                                                                                                                                              |
| [22] Sayal (2013)                                                      | Maternal age, parity, highest level of maternal education, daily frequency of smoking, use of cannabis and/or other illicit drugs during the first trimester, homeownership, whether currently married, high scores (>12) on the Edinburgh Postnatal Depression Scale, and child gestational age, birth weight and gender.                                                                                                                                                                                                                                                                                                                                         |
| [30] McCarthy (2013)                                                   | Maternal age, smoking, years of schooling, ethnicity, body mass index, infant sex, maternal status, family income, and drug use during pregnancy. Adjusted for clustering. Birthweight adjusted for gestational age at delivery.                                                                                                                                                                                                                                                                                                                                                                                                                                   |
| [40] Andersen (2012)                                                   | Number of previous abortions, coffee consumption, changes in alcohol consumption since prior to pregnancy and smoking. Effect of coffee consumption and smoking was stratified according to period. The model is stratified according to maternal age and parity.                                                                                                                                                                                                                                                                                                                                                                                                  |
| [21] Salihi (2011)                                                     | Maternal age, parity, race, smoking, education, marital status, adequacy of prenatal care, maternal height, gender of the infant, and year of birth                                                                                                                                                                                                                                                                                                                                                                                                                                                                                                                |
| [31] Robinson (2010)                                                   | Maternal age, maternal education, presence of the biological father in the family home, family income, stress in pregnancy, child's age at follow up (and child's age at follow-up squared), and maternal cigarette smoking.                                                                                                                                                                                                                                                                                                                                                                                                                                       |
| [32] Jaddoe (2007)                                                     | Controlled for maternal body mass index, smoking, educational level, height, ethnicity, parity and age and infant gender; birth weight and low birth weight models also controlled for gestational age.                                                                                                                                                                                                                                                                                                                                                                                                                                                            |
| [43] Bille (2007)                                                      | Parental age and social class.                                                                                                                                                                                                                                                                                                                                                                                                                                                                                                                                                                                                                                     |
| [33] Sayal (2007)                                                      | Gender, smoking, cannabis use and use of illicit drugs in the first trimester, highest level of maternal education, home ownership, marital status, parity, maternal age group, high EPDS score, child ethnicity, gestational age group, and birth weight.                                                                                                                                                                                                                                                                                                                                                                                                         |
| [34] Albertsen (2004)                                                  | Type 1 diabetes, age, previous preterm delivery, smoking during pregnancy, coffee consumption during pregnancy, occupational status in the household, parity, and total alcohol consumption during pregnancy.                                                                                                                                                                                                                                                                                                                                                                                                                                                      |
| [35] Lundsberg (1997)                                                  | Small for gestational age: smoking in month 7, ethnicity, weight, height, infant sex, parity, bleeding during pregnancy, high blood pressure, and preeclampsia/eclampsia. Low birthweight: smoking in month 7, height, weight, ethnicity, infant sex, parity, coffee use in month 7, exercise in third trimester, employment, bleeding during pregnancy, high blood pressure, pre-eclampsia/eclampsia, anomalies, and placental problems. Preterm delivery: smoking in month 7, height, parity, age, caffeine use in month 7, exercise first 16 weeks, bleeding during pregnancy, high blood pressure, pre-eclampsia/eclampsia, anomalies, and placental problems. |
| [41] Windham (1997)                                                    | Maternal age, prior spontaneous abortion, gestational age at interview, and cigarette and caffeine consumption in week before interview.                                                                                                                                                                                                                                                                                                                                                                                                                                                                                                                           |
| [36] Passaro (1996)                                                    | Gestational age, infant sex, parity, maternal smoking, and maternal body mass index.                                                                                                                                                                                                                                                                                                                                                                                                                                                                                                                                                                               |
| [37] Shu (1995)                                                        | Gestational age, parity, smoking and income.                                                                                                                                                                                                                                                                                                                                                                                                                                                                                                                                                                                                                       |
| [20] Peacock (1995)                                                    | Unadjusted                                                                                                                                                                                                                                                                                                                                                                                                                                                                                                                                                                                                                                                         |
| [38] Olsen (1991)                                                      | Age, school education, parity, alcohol and smoking entered the model as "dummy variables".                                                                                                                                                                                                                                                                                                                                                                                                                                                                                                                                                                         |
| [42] Ogston (1992)                                                     | Gestational age at birth, sex, mother's age, parity and smoking.                                                                                                                                                                                                                                                                                                                                                                                                                                                                                                                                                                                                   |
| [46] Parry (1992)                                                      | Gestational age at birth, sex, mother's age, parity and smoking.                                                                                                                                                                                                                                                                                                                                                                                                                                                                                                                                                                                                   |
| [39] Brooke (1989)                                                     | Gestational age, sex, maternal height, and parity                                                                                                                                                                                                                                                                                                                                                                                                                                                                                                                                                                                                                  |
| [44] Ernhart (1989)                                                    | Parity, smoking, race and year of study.                                                                                                                                                                                                                                                                                                                                                                                                                                                                                                                                                                                                                           |



Supplementary Table 3. Assessment of studies using the The Newcastle-Ottawa Scale (NOS)

| Risk of bias questions  | Representativeness of the exposed cohort | Selection of the non-exposed cohort | Ascertainment of exposure | Outcome of interest was not present at start of study | Comparability of cohorts on the basis of the design/analysis | Assessment of outcome blind/record linkage | Follow-up long enough for outcome to occur | Adequacy of follow up of cohorts |
|-------------------------|------------------------------------------|-------------------------------------|---------------------------|-------------------------------------------------------|--------------------------------------------------------------|--------------------------------------------|--------------------------------------------|----------------------------------|
| Study ID                |                                          |                                     |                           |                                                       |                                                              |                                            |                                            |                                  |
| Albertson 2003          | ✓                                        | ✓                                   | ✓                         | ✓                                                     | ✓                                                            | ✓                                          | ✓                                          | ✓                                |
| Anderson 2012           | ✓                                        | ✓                                   | ✓                         | ✓                                                     | ✓                                                            | ✓                                          | ✓                                          | ✓                                |
| Bille 2007              | ✓                                        | ✓                                   | ✓                         | ✓                                                     | ✓                                                            | ✓                                          | ✓                                          | ?                                |
| Brooke 1989             | ✓                                        | ✓                                   | ✓                         | ✓                                                     | ✓                                                            | ✓                                          | ✓                                          | ✓                                |
| Erhart                  | x                                        | ✓                                   | ✓                         | ✓                                                     | ?                                                            | ✓                                          | ✓                                          | x                                |
| Jaddoe 2007             | ✓                                        | ✓                                   | x                         | ✓                                                     | ✓                                                            | ✓                                          | ✓                                          | ✓                                |
| Larsen 2013             | ✓                                        | ✓                                   | ✓                         | ✓                                                     | ✓                                                            | x                                          | ✓                                          | x                                |
| Lundsberg (Lisbet) 2015 | ?                                        | ✓                                   | ✓                         | ✓                                                     | ✓                                                            | ✓                                          | ✓                                          | ✓                                |
| Lundsberg (Lisbet) 1997 | ?                                        | ✓                                   | ✓                         | ✓                                                     | ✓                                                            | ✓                                          | ✓                                          | ✓                                |
| McCarthy 2013           | ✓                                        | ✓                                   | ✓                         | ✓                                                     | ✓                                                            | ✓                                          | ✓                                          | ✓                                |
| Miyake 2014             | ?                                        | ✓                                   | x                         | ✓                                                     | ✓                                                            | ✓                                          | ✓                                          | ✓                                |

1  
2  
3  
4  
5  
6  
7  
8  
9  
10  
11  
12  
13  
14  
15  
16  
17  
18  
19  
20  
21  
22  
23  
24  
25  
26  
27  
28  
29  
30  
31  
32  
33  
34  
35  
36  
37  
38  
39  
40  
41  
42  
43  
44  
45  
46  
47

|               |   |   |   |   |   |   |   |   |
|---------------|---|---|---|---|---|---|---|---|
| Niclasen 2013 | ? | ✓ | ? | ✓ | x | x | ✓ | ? |
| Nykjaer 2014  | x | ✓ | x | ✓ | ✓ | ✓ | ✓ | ✓ |
| Ogston 1992   | ? | ✓ | ✓ | ✓ | x | ✓ | ✓ | ✓ |
| Olsen 1991    | ? | ✓ | x | ✓ | ✓ | ✓ | ✓ | ✓ |
| Parry 1992    | ? | ✓ | ✓ | ✓ | ✓ | x | ✓ | x |
| Passaro 1996  | ? | ✓ | x | ✓ | ✓ | ✓ | ✓ | ✓ |
| Peacock 1995  | ? | ✓ | ✓ | ✓ | x | ? | ✓ | ✓ |
| Robinson 2010 | ? | ✓ | x | ✓ | ✓ | x | ✓ | ✓ |
| Salihu 2011   | ? | ✓ | x | ✓ | ✓ | ? | ✓ | ✓ |
| Sayal 2012    | ✓ | ✓ | x | ✓ | ✓ | ? | ✓ | ✓ |
| Sayal 2006    | ✓ | ✓ | x | ✓ | ✓ | x | ✓ | ✓ |
| Shu 1995      | ✓ | ✓ | ✓ | ✓ | x | ✓ | ✓ | ✓ |
| Windham 1997  | x | ✓ | ✓ | ✓ | ✓ | ✓ | ✓ | ✓ |



Supplementary figure 1a) Odds ratios for externalising behaviour comparing low alcohol consumption (up to 32g/week) with no alcohol consumption (3 studies); 1b) Odds ratios for internalising behaviour comparing low alcohol consumption (up to 32g/week) with no alcohol consumption (2 studies); OR: Odds ratio, CI: Confidence intervals.

Supplementary figure 1a) Odds ratios for externalising behaviour comparing low alcohol consumption (up to 32g/week) with no alcohol consumption (3 studies); 1b) Odds ratios for internalising behaviour comparing low alcohol consumption (up to 32g/week) with no alcohol consumption (2 studies); OR: Odds ratio, CI: Confidence intervals.

297x209mm (300 x 300 DPI)

### MOOSE Checklist for Meta-analyses of Observational Studies

| Item No                                     | Recommendation                                                                                             | Reported on Page No   |
|---------------------------------------------|------------------------------------------------------------------------------------------------------------|-----------------------|
| Reporting of background should include      |                                                                                                            |                       |
| 1                                           | Problem definition                                                                                         | 1                     |
| 2                                           | Hypothesis statement                                                                                       | 4                     |
| 3                                           | Description of study outcome(s)                                                                            | 6&7                   |
| 4                                           | Type of exposure or intervention used                                                                      | 6                     |
| 5                                           | Type of study designs used                                                                                 | 6                     |
| 6                                           | Study population                                                                                           | 7                     |
| Reporting of search strategy should include |                                                                                                            |                       |
| 7                                           | Qualifications of searchers (eg, librarians and investigators)                                             | 7                     |
| 8                                           | Search strategy, including time period included in the synthesis and key words                             | supplementary table 1 |
| 9                                           | Effort to include all available studies, including contact with authors                                    | 7                     |
| 10                                          | Databases and registries searched                                                                          | 7                     |
| 11                                          | Search software used, name and version, including special features used (eg, explosion)                    | supplementary table 1 |
| 12                                          | Use of hand searching (eg, reference lists of obtained articles)                                           | 7                     |
| 13                                          | List of citations located and those excluded, including justification                                      | Figure 1              |
| 14                                          | Method of addressing articles published in languages other than English                                    | 13                    |
| 15                                          | Method of handling abstracts and unpublished studies                                                       | 6                     |
| 16                                          | Description of any contact with authors                                                                    | 6                     |
| Reporting of methods should include         |                                                                                                            |                       |
| 17                                          | Description of relevance or appropriateness of studies assembled for assessing the hypothesis to be tested | 6                     |

|                                     |                                                                                                                                                                                                                                                                              |                           |
|-------------------------------------|------------------------------------------------------------------------------------------------------------------------------------------------------------------------------------------------------------------------------------------------------------------------------|---------------------------|
| 18                                  | Rationale for the selection and coding of data (eg, sound clinical principles or convenience)                                                                                                                                                                                | 7                         |
| 19                                  | Documentation of how data were classified and coded (eg, multiple raters, blinding and interrater reliability)                                                                                                                                                               | 7&8                       |
| 20                                  | Assessment of confounding (eg, comparability of cases and controls in studies where appropriate)                                                                                                                                                                             | supplementary table 2 & 8 |
| 21                                  | Assessment of study quality, including blinding of quality assessors, stratification or regression on possible predictors of study results                                                                                                                                   | 8                         |
| 22                                  | Assessment of heterogeneity                                                                                                                                                                                                                                                  | Figures 2&3               |
| 23                                  | Description of statistical methods (eg, complete description of fixed or random effects models, justification of whether the chosen models account for predictors of study results, dose-response models, or cumulative meta-analysis) in sufficient detail to be replicated | 9&10                      |
| 24                                  | Provision of appropriate tables and graphics                                                                                                                                                                                                                                 | 27-36                     |
| Reporting of results should include |                                                                                                                                                                                                                                                                              |                           |
| 25                                  | Graphic summarizing individual study estimates and overall estimate                                                                                                                                                                                                          | Figures 2&3               |
| 26                                  | Table giving descriptive information for each study included                                                                                                                                                                                                                 | Table 1-3                 |
| 27                                  | Results of sensitivity testing (eg, subgroup analysis)                                                                                                                                                                                                                       | Figures 2&3               |
| 28                                  | Indication of statistical uncertainty of findings                                                                                                                                                                                                                            | 19                        |

1  
2  
3  
4  
5  
6  
7  
8  
9  
10  
11  
12  
13  
14  
15  
16  
17  
18  
19  
20  
21  
22  
23  
24  
25  
26  
27  
28  
29  
30  
31  
32  
33  
34  
35  
36  
37  
38  
39  
40  
41  
42  
43  
44  
45  
46  
47  
48  
49

**PRISMA 2009 Checklist**

| Section/topic             | #  | Checklist item                                                                                                                                                                                                                                                                                              | Reported on page # |
|---------------------------|----|-------------------------------------------------------------------------------------------------------------------------------------------------------------------------------------------------------------------------------------------------------------------------------------------------------------|--------------------|
| <b>TITLE</b>              |    |                                                                                                                                                                                                                                                                                                             |                    |
| Title                     | 1  | Identify the report as a systematic review, meta-analysis, or both.                                                                                                                                                                                                                                         | 1                  |
| <b>ABSTRACT</b>           |    |                                                                                                                                                                                                                                                                                                             |                    |
| Structured summary        | 2  | Provide a structured summary including, as applicable: background; objectives; data sources; study eligibility criteria, participants, and interventions; study appraisal and synthesis methods; results; limitations; conclusions and implications of key findings; systematic review registration number. | 3                  |
| <b>INTRODUCTION</b>       |    |                                                                                                                                                                                                                                                                                                             |                    |
| Rationale                 | 3  | Describe the rationale for the review in the context of what is already known.                                                                                                                                                                                                                              | 4                  |
| Objectives                | 4  | Provide an explicit statement of questions being addressed with reference to participants, interventions, comparisons, outcomes, and study design (PICOS).                                                                                                                                                  | 5&6                |
| <b>METHODS</b>            |    |                                                                                                                                                                                                                                                                                                             |                    |
| Protocol and registration | 5  | Indicate if a review protocol exists, if and where it can be accessed (e.g., Web address), and, if available, provide registration information including registration number.                                                                                                                               | 5                  |
| Eligibility criteria      | 6  | Specify study characteristics (e.g., PICOS, length of follow-up) and report characteristics (e.g., years considered, language, publication status) used as criteria for eligibility, giving rationale.                                                                                                      | 5 & 6              |
| Information sources       | 7  | Describe all information sources (e.g., databases with dates of coverage, contact with study authors to identify additional studies) in the search and date last searched.                                                                                                                                  | 6                  |
| Search                    | 8  | Present full electronic search strategy for at least one database, including any limits used, such that it could be repeated.                                                                                                                                                                               | supTable 1         |
| Study selection           | 9  | State the process for selecting studies (i.e., screening, eligibility, included in systematic review, and, if applicable, included in the meta-analysis).                                                                                                                                                   | Figure 1           |
| Data collection process   | 10 | Describe method of data extraction from reports (e.g., piloted forms, independently, in duplicate) and any processes for obtaining and confirming data from investigators.                                                                                                                                  | 6                  |

|                                    |    |                                                                                                                                                                                                                        |                          |
|------------------------------------|----|------------------------------------------------------------------------------------------------------------------------------------------------------------------------------------------------------------------------|--------------------------|
| Data items                         | 11 | List and define all variables for which data were sought (e.g., PICOS, funding sources) and any assumptions and simplifications made.                                                                                  | 7 & 8                    |
| Risk of bias in individual studies | 12 | Describe methods used for assessing risk of bias of individual studies (including specification of whether this was done at the study or outcome level), and how this information is to be used in any data synthesis. | 6 & 7                    |
| Summary measures                   | 13 | State the principal summary measures (e.g., risk ratio, difference in means).                                                                                                                                          | Figure 2&3<br>supfigure1 |
| Synthesis of results               | 14 | Describe the methods of handling data and combining results of studies, if done, including measures of consistency (e.g., $I^2$ ) for each meta-analysis.                                                              | Figure 2&3<br>supfigure1 |
| Risk of bias across studies        | 15 | Specify any assessment of risk of bias that may affect the cumulative evidence (e.g., publication bias, selective reporting within studies).                                                                           | 7                        |
| Additional analyses                | 16 | Describe methods of additional analyses (e.g., sensitivity or subgroup analyses, meta-regression), if done, indicating which were pre-specified.                                                                       | 8                        |
| <b>RESULTS</b>                     |    |                                                                                                                                                                                                                        |                          |
| Study selection                    | 17 | Give numbers of studies screened, assessed for eligibility, and included in the review, with reasons for exclusions at each stage, ideally with a flow diagram.                                                        | Figure 1                 |
| Study characteristics              | 18 | For each study, present characteristics for which data were extracted (e.g., study size, PICOS, follow-up period) and provide the citations.                                                                           | Table 1-3                |
| Risk of bias within studies        | 19 | Present data on risk of bias of each study and, if available, any outcome level assessment (see item 12).                                                                                                              | 7                        |
| Results of individual studies      | 20 | For all outcomes considered (benefits or harms), present, for each study: (a) simple summary data for each intervention group (b) effect estimates and confidence intervals, ideally with a forest plot.               | Figure 2&3<br>supfigure1 |
| Synthesis of results               | 21 | Present results of each meta-analysis done, including confidence intervals and measures of consistency.                                                                                                                | Figure 2&3<br>supfigure1 |
| Risk of bias across studies        | 22 | Present results of any assessment of risk of bias across studies (see Item 15).                                                                                                                                        | 13-14                    |
| Additional analysis                | 23 | Give results of additional analyses, if done (e.g., sensitivity or subgroup analyses, meta-regression [see Item 16]).                                                                                                  | Figure 2&3               |

1  
2  
3  
4  
5  
6  
7  
8  
9  
10  
11  
12  
13  
14  
15  
16  
17  
18  
19  
20  
21  
22  
23  
24  
25  
26  
27  
28  
29  
30  
31  
32  
33  
34  
35  
36  
37  
38  
39  
40  
41  
42  
43  
44  
45  
46  
47  
48  
49

|                     |    |                                                                                                                                                                                      |            |
|---------------------|----|--------------------------------------------------------------------------------------------------------------------------------------------------------------------------------------|------------|
|                     |    |                                                                                                                                                                                      | supfigure1 |
| <b>DISCUSSION</b>   |    |                                                                                                                                                                                      |            |
| Summary of evidence | 24 | Summarize the main findings including the strength of evidence for each main outcome; consider their relevance to key groups (e.g., healthcare providers, users, and policy makers). | 13&14      |
| Limitations         | 25 | Discuss limitations at study and outcome level (e.g., risk of bias), and at review-level (e.g., incomplete retrieval of identified research, reporting bias).                        | 13 & 14    |
| Conclusions         | 26 | Provide a general interpretation of the results in the context of other evidence, and implications for future research.                                                              | 13         |
| <b>FUNDING</b>      |    |                                                                                                                                                                                      |            |
| Funding             | 27 | Describe sources of funding for the systematic review and other support (e.g., supply of data); role of funders for the systematic review.                                           | 17         |
