# Supplementary material for: Low alcohol consumption and pregnancy and childhood outcomes: time to change guidelines indicating apparently ‘safe’ levels of alcohol during pregnancy? A systematic review and meta-analyses
Source: PubMed Central journal article supplement — BMJ Open. 2017 Aug 3;7(7):e015410. doi: 10.1136/bmjopen-2016-015410 (PMC5642770; doi:10.1136/bmjopen-2016-015410), 2017-08-03
Supplement: bmjopen-2016-015410supp002.pdf [file bmjopen-2016-015410supp002.pdf]

**Supplementary Table 1.** Search Strategy 1950 to 11-07-2016. MEDLINE, PsycINFO, EMBASE on Ovid; the Cochrane Library including CENTRAL (the Cochrane Central Database of Controlled Trials) on Wiley Interscience; and Science Citation Index, Social Science Citation Index, on Web of Science.

---

- 1 exp pregnancy/ (719661)
- 2 Pregnant Women/ (5199)
- 3 preconception care/ or prenatal care/ (21644)
- 4 exp "embryonic and fetal development"/ (212127)
- 5 Fetus/ (68424)
- 6 exp Pregnancy Complications/ (343999)
- 7 (prepregnan\$ or conception or preconception or pregnan\$ or prenatal\$ or pre-natal\$ or f?etal or f?etus or in utero).ti,ab. (588557)
- 8 Maternal exposure/ (5534)
- 9 or/1-8 (1079283)
- 10 Ethanol/ (73449)
- 11 Alcohol dehydrogenase/ (5809)
- 12 Aldehyde Oxidoreductases/ (3672)
- 13 exp Drinking Behavior/ (57821)
- 14 Temperance/ (2430)
- 15 alcohol\$.ti. (106954)
- 16 (alcohol dehydrogenase or acetaldehyde dehydrogenase).ti,ab. (8557)
- 17 ((alcohol or alcoholic) adj3 (drink\$ or exposure or consumption or consume\$ or consuming or low or light or moderat\$ or abstin\$ or abstain\$)).ti,ab. (49470)
- 18 ((low or light or moderate or abstin\$ or abstain\$ or pattern\$ or behavior\$r\$) adj3 drink\$).ti,ab. (10558)
- 19 (ADH1B\$ or teetotal\$ or temperance or nondrink\$ or non-drink\$).ti,ab. (3093)
- 20 Genome-Wide Association Study/ or Linkage Disequilibrium/ or genotype/ or phenotype/ or polymorphism, genetic/ or (polymorphism\$ or ((gene or genes or genetic or genotyp\$) adj3 (instrument\$ or variant\$ or variable\$ or variability or variabilities or variance\$))).ti,ab. (494904)
- 21 \*Alcohols/ or exp \*Alcohol-Related Disorders/ or (alcohol adj3 (misuse or "use" or abuse or addict\$ or dependence or response\$ or susceptibility)).ti,ab. (110843)
- 22 20 and 21 (3108)
- 23 or/10-19,22 (213050)

24 9 and 23 (11403)  
25 letter/ (861500)  
26 editorial/ (368458)  
27 news/ (166329)  
28 exp historical article/ (325965)  
29 Anecdotes as topic/ (4586)  
30 comment/ (610211)  
31 case report/ (1708277)  
32 (letter or comment\$.ti. (100442)  
33 or/25-32 (3417468)  
34 randomized controlled trial/ or Randomized Controlled Trials as Topic/ or random\$.ti,ab. (888907)  
35 33 not 34 (3386180)  
36 animals/ not humans/ (3889478)  
37 exp Animals, Laboratory/ (730783)  
38 exp Animal Experimentation/ (6477)  
39 exp Models, Animal/ not humans/ (310115)  
40 exp rodentia/ (2688128)  
41 (rat or rats or mouse or mice).ti. (1123907)  
42 or/35-41 (7849766)  
43 24 not 42 (6498)  
44 meta-analysis/ (52850)  
45 meta-analysis as topic/ (13933)  
46 (meta analy\$ or metaanaly\$ or metanaly\$ or meta regression).ti,ab. (72390)  
47 ((systematic\$ or evidence\$ or realist or narrative or literature) adj2 (review\$ or overview\$)).ti,ab.  
(171877)  
48 "review of reviews".ti,ab. (211)  
49 (reference list\$ or bibliograph\$ or hand search\$ or manual search\$ or relevant journals).ab.  
(27094)  
50 (search strategy or search criteria or systematic search or study selection or data extraction).ab.  
(28877)  
51 (search\$ adj4 literature).ab. (30686)

52 (medline or pubmed or cochrane or embase or psychlit or psyclit or psychinfo or cinahl or science Citation index or bids or cancerlit).ab. (95294)

53 cochrane.jw. (11053)

54 ((multiple treatment\$ or indirect or mixed) adj2 comparison).ti,ab. (991)

55 or/44-54 (293491)

56 43 and 55 (201)

57 epidemiologic studies/ (6077)

58 ep.fs. (1223653)

59 exp case control studies/ (691899)

60 exp cohort studies/ (1394149)

61 cross-sectional studies/ (185407)

62 Mendelian Randomization Analysis/ (229)

63 (case control or negative control).ti,ab. (93097)

64 (cohort adj (study or studies or analys\$)).ti,ab. (98537)

65 ((follow up or observational) adj (study or studies)).ti,ab. (87771)

66 ((longitudinal\$ or retrospectiv\$ or prospectiv\$) and (study or studies or studied or review\$ or analys\$ or cohort\$)).ti,ab. (870699)

67 cross sectional.ti,ab. (183479)

68 (mendel\$ or natural experiment\$).ti,ab. (11082)

69 ((family or sibling or population) adj3 (study or studies)).ti,ab. (115245)

70 or/57-69 (2937160)

71 exp guideline/ (25834)

72 guidelines as topic/ or practice guidelines as topic/ (114690)

73 guideline\$.mp. (291621)

74 or/71-73 (291621)

75 55 or 70 or 74 (3362878)

76 43 and 75 (3349)

77 limit 76 to english language (3096)

78 ((smok\$ or drug\$ or tobacco or nicotine or cigarette\$ or substance\$ or methamphetamine\$ or amphetamine\$ or cocaine\$ or heroin or cannabis or marijuana) not (alcohol or alcoholic or drink\$)).ti. (489662)
