# Supplementary material for: Low alcohol consumption and pregnancy and childhood outcomes: time to change guidelines indicating apparently ‘safe’ levels of alcohol during pregnancy? A systematic review and meta-analyses
Source: PubMed Central journal article supplement — BMJ Open. 2017 Aug 3;7(7):e015410. doi: 10.1136/bmjopen-2016-015410 (PMC5642770; doi:10.1136/bmjopen-2016-015410), 2017-08-03
Supplement: bmjopen-2016-015410supp003.pdf [file bmjopen-2016-015410supp003.pdf]

**Supplementary Table 2. Assessment of studies using the The Newcastle-Ottawa Scale (NOS)**

| <b>Risk of bias questions</b>  | <b>Representativeness of the exposed cohort</b> | <b>Selection of the non-exposed cohort</b> | <b>Ascertainment of exposure</b> | <b>Outcome of interest was not present at start of study</b> | <b>Comparability of cohorts on the basis of the design/analysis</b> | <b>Assessment of outcome blind/record linkage</b> | <b>Follow-up long enough for outcome to occur</b> | <b>Adequacy of follow up of cohorts</b> |
|--------------------------------|-------------------------------------------------|--------------------------------------------|----------------------------------|--------------------------------------------------------------|---------------------------------------------------------------------|---------------------------------------------------|---------------------------------------------------|-----------------------------------------|
| <b>Study ID</b>                |                                                 |                                            |                                  |                                                              |                                                                     |                                                   |                                                   |                                         |
| <b>Albertson 2003</b>          | ✓                                               | ✓                                          | ✓                                | ✓                                                            | ✓                                                                   | ✓                                                 | ✓                                                 | ✓                                       |
| <b>Anderson 2012</b>           | ✓                                               | ✓                                          | ✓                                | ✓                                                            | ✓                                                                   | ✓                                                 | ✓                                                 | ✓                                       |
| <b>Bille 2007</b>              | ✓                                               | ✓                                          | ✓                                | ✓                                                            | ✓                                                                   | ✓                                                 | ✓                                                 | ?                                       |
| <b>Brooke 1989</b>             | ✓                                               | ✓                                          | ✓                                | ✓                                                            | ✓                                                                   | ✓                                                 | ✓                                                 | ✓                                       |
| <b>Erhart</b>                  | x                                               | ✓                                          | ✓                                | ✓                                                            | ?                                                                   | ✓                                                 | ✓                                                 | x                                       |
| <b>Jaddoe 2007</b>             | ✓                                               | ✓                                          | x                                | ✓                                                            | ✓                                                                   | ✓                                                 | ✓                                                 | ✓                                       |
| <b>Larsen 2013</b>             | ✓                                               | ✓                                          | ✓                                | ✓                                                            | ✓                                                                   | x                                                 | ✓                                                 | x                                       |
| <b>Lundsberg (Lisbet) 2015</b> | ?                                               | ✓                                          | ✓                                | ✓                                                            | ✓                                                                   | ✓                                                 | ✓                                                 | ✓                                       |
| <b>Lundsberg (Lisbet) 1997</b> | ?                                               | ✓                                          | ✓                                | ✓                                                            | ✓                                                                   | ✓                                                 | ✓                                                 | ✓                                       |
| <b>McCarthy 2013</b>           | ✓                                               | ✓                                          | ✓                                | ✓                                                            | ✓                                                                   | ✓                                                 | ✓                                                 | ✓                                       |
| <b>Miyake 2014</b>             | ?                                               | ✓                                          | x                                | ✓                                                            | ✓                                                                   | ✓                                                 | ✓                                                 | ✓                                       |

|                      |   |   |   |   |   |   |   |   |
|----------------------|---|---|---|---|---|---|---|---|
| <b>Niclasen 2013</b> | ? | ✓ | ? | ✓ | x | x | ✓ | ? |
| <b>Nykjaer 2014</b>  | x | ✓ | x | ✓ | ✓ | ✓ | ✓ | ✓ |
| <b>Ogston 1992</b>   | ? | ✓ | ✓ | ✓ | x | ✓ | ✓ | ✓ |
| <b>Olsen 1991</b>    | ? | ✓ | x | ✓ | ✓ | ✓ | ✓ | ✓ |
| <b>Parry 1992</b>    | ? | ✓ | ✓ | ✓ | ✓ | x | ✓ | x |
| <b>Passaro 1996</b>  | ? | ✓ | x | ✓ | ✓ | ✓ | ✓ | ✓ |
| <b>Peacock 1995</b>  | ? | ✓ | ✓ | ✓ | x | ? | ✓ | ✓ |
| <b>Robinson 2010</b> | ? | ✓ | x | ✓ | ✓ | x | ✓ | ✓ |
| <b>Salihu 2011</b>   | ? | ✓ | x | ✓ | ✓ | ? | ✓ | ✓ |
| <b>Sayal 2012</b>    | ✓ | ✓ | x | ✓ | ✓ | ? | ✓ | ✓ |
| <b>Sayal 2006</b>    | ✓ | ✓ | x | ✓ | ✓ | x | ✓ | ✓ |
| <b>Shu 1995</b>      | ✓ | ✓ | ✓ | ✓ | x | ✓ | ✓ | ✓ |
| <b>Windham 1997</b>  | x | ✓ | ✓ | ✓ | ✓ | ✓ | ✓ | ✓ |
